# Supplementary material
Source: publisher figshare collection journal article supplement (https://acs.figshare.com/ndownloader/files/4268812)
Supplement: Supplementary file 1 [file 4268812]

# Iminium ion cascade reaction in the total synthesis of (+)-Vincadifformine

*Ganesh Pandey\* and Prasanna Kumara C*

Division of Organic Chemistry,  
National Chemical Laboratory, Pune-411008, India

E mail: [gp.pandey@ncl.res.in](mailto:gp.pandey@ncl.res.in)

## Supporting information available

### I) Experimental Section

#### II) $^1\text{H}$ and $^{13}\text{C}$ spectra of compounds

### I) Experimental Section

**General Procedures:** All moisture-sensitive reactions were performed under an atmosphere of argon and glass wares were dried in an oven at 125 °C prior to use. Dry tetrahydrofuran (THF) and diethyl ether ( $\text{Et}_2\text{O}$ ) were obtained by passing commercially available pre-dried, oxygen-free formulations through activated alumina columns and dried by distillation over sodium/benzophenone. Toluene, dimethylformamide (DMF) and dichloromethane (DCM) were distilled from calcium hydride and stored over 4Å molecular sieves. Pyridine and triethyl amine (TEA) were distilled over potassium hydroxide. Solvents used for chromatography were distilled at respective boiling points using known procedures.

All commercial reagents were obtained from Sigma-Aldrich Chemical Co and S. D. Fine Chemical Co. India. Reactions were monitored by thin layer chromatography (TLC, 0.25 mm E. Merck silica gel plates, 60F<sub>254</sub>) and visualized by using UV light, ethanolic solution of phosphomolybdic acid and iodine. Column chromatography was performed on silica gel 60-120/ 100-200/ 230-400 mesh obtained from S. D. Fine Chemical Co. India or SRL India. Typical syringe and cannula techniques were used to transfer air and moisture sensitive reagents.

All melting points were uncorrected in degree Celsius and were recorded on a Thermo-nik melting point apparatus. IR spectra were recorded on a Perkin-Elmer infrared spectrometer model 599-B and model 1620 FT-IR.  $^1\text{H}$  NMR spectra were recorded on Bruker AC-200, Bruker AV-400 and Bruker DRX500 instruments using deuteriated solvent. Chemical shifts are reported in ppm. Proton coupling constants ( $J$ ) are reported as absolute values in Hz and multiplicity (br, broadened; s, singlet; d, doublet; t, triplet; dd, doublet of doublet; dt, doublet of triplet; td, triplet of doublet; m, multiplet).  $^{13}\text{C}$  NMR spectra were recorded on Bruker AC-200, AV-400 and Bruker DRX500 instruments operating at 50MHz, 100MHz and 125MHz respectively.  $^{13}\text{C}$  NMR chemical shifts are reported in ppm relative to the central line of  $\text{CDCl}_3$  ( $\delta$  77.0). Electro spray ionization (ESI) mass spectrometry (MS) experiments were performed on a Finnigan Mat-1020 spectrometer. High resolution mass spectrometric data were obtained using MSI Concept through direct insertion probe. Optical rotations were measured on a JASCO P-1030 polarimeter.

**(S)- 2-Chloropyridin-3-yl) (2-(hydroxymethyl) pyrrolidin-1-yl)nicotinamide (II):**

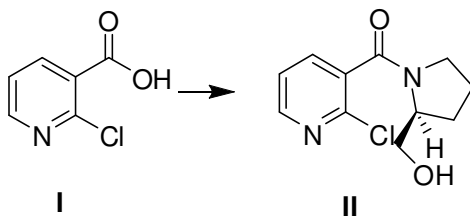

To a stirred solution of 2-chloronicotinic acid (2.15 g, 13.667 mmol) and triethylamine (2.1 mL, 15.04 mmol) in anhydrous dichloromethane (65 mL) at  $-5\text{ }^{\circ}\text{C}$  was added ethyl chloroformate (1.30 mL, 13.66 mmol). The resulting mixture was stirred at  $-5\text{ }^{\circ}\text{C}$  for 45 minutes and (S) - Prolinol (1.52 g, 15.04 mmol) was added into it. The reaction mixture was allowed to warm to room temperature and stirred for additional 4 h, concentrated, purified by column chromatography ( $\text{SiO}_2$ , acetone-petroleum ether, 1:5 $\rightarrow$ 2:5) to afford **II** (3.22 g, 98%) as a colorless viscous oil which got crystallized from ethyl acetate/ petroleum ether as a colorless solid (mp =  $61\text{--}62\text{ }^{\circ}\text{C}$ );  $R_f = 0.3$  ( $\text{SiO}_2$ , acetone-petroleum ether, 3:7);  $[\alpha]_D^{26} = -78.023$  ( $\text{CHCl}_3$ ,  $c = 0.85$ );

**IR** (film) $\nu_{\text{max}} = 3397, 2977, 1622, 1074\text{ cm}^{-1}$ ;

**$^1\text{H}$  NMR** (500 MHz,  $\text{CDCl}_3/\text{D}_2\text{O}$ ) = 8.44 (dd,  $J = 1.9, 4.9\text{ Hz}$ , 1H), 7.69 (dd,  $J = 1.9, 7.4\text{ Hz}$ , 1H), 7.32 (dd,  $J = 4.9, 7.7\text{ Hz}$ , 1H), 4.52-4.35 (m, 2H), 3.83-3.72 (m, 2H), 3.33-3.27 (m, 2H), 2.21-2.15 (m, 1H), 1.94-1.89 (m, 1H), 1.85-1.81 (m, 1H), 1.75-1.68 (m, 1H);

$^{13}\text{C}$  NMR (50 MHz,  $\text{CDCl}_3$ ) = 166.7, 150.1, 146.4, 136.4, 132.9, 122.7, 65.3, 61.1, 49.1, 28.1 24.2;

HR-MS (EI): calcd for  $\text{C}_{11}\text{H}_{13}\text{ClN}_2\text{O}_2$ : 240.06656. Found: 240.06084.

**1,2,3,10,11,11a,(S)-Hexahydro-5H-pyrrolo[2,1-c]pyrido-[3,2-f][1,4]oxazepin-5-one(8):**

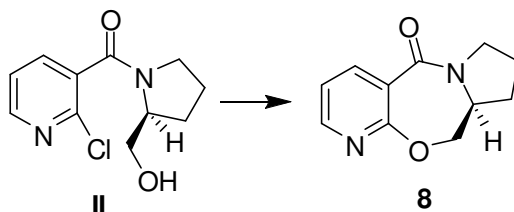

A mixture of **II** (1.2 g, 4.98 mmol) and sodium hydride (0.131 g, 5.48 mmol) in 60 mL of anhydrous THF was refluxed under nitrogen for 16 h. Sodium chloride and unreacted NaH were removed by filtration, solvent evaporation and crystallization (ethyl acetate) afford analytically pure **8** as white crystals (1.0 g, 99%); mp = 146-147 °C;  $[\alpha]_{\text{D}}^{25} = +230.96^\circ$  ( $\text{CHCl}_3$ ,  $c = 1.55$ );

IR (film) $\nu_{\text{max}}$  = 3003, 1624, 1590, 1463, 1433, 1383, 1215  $\text{cm}^{-1}$ ;

$^1\text{H}$  NMR (200 MHz,  $\text{CDCl}_3$ ) = 8.61 (dd,  $J = 2.0, 7.8$  Hz, 1H), 8.36 (dd,  $J = 2.0, 4.5$  Hz, 1H), 7.10 (dd,  $J = 4.6, 7.8$  Hz, 1H), 4.6 (d,  $J = 11.5$  Hz, 1H), 4.16-3.93 (m, 2H), 3.85-3.63 (m, 2H), 2.33-2.19 (m, 1H), 2.09-1.81 (m, 2H), 1.76-1.57 (m, 1H);

$^{13}\text{C}$  NMR (50 MHz,  $\text{CDCl}_3$ ) = 162.5, 160.4, 151.2, 143.5, 118.1, 115.8, 73.2, 57.2, 48.1, 29.2, 23.3;

HR-MS (EI): calcd for  $\text{C}_{11}\text{H}_{12}\text{N}_2\text{O}_2$ : 204.08988. Found: 204.08954.

**(4aS, 9aS)-4a-Allyl-4a, 7, 8, 9, 9a, 10-hexahydropyrido [3, 2-f] pyrrolo [2, 1-c] [1, 4] oxazepin-5(2H)-one (9):**

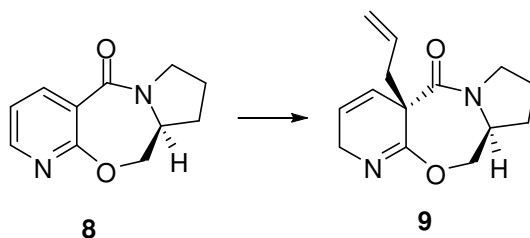

To a stirred solution of finely powdered **8** (0.25 g, 1.23 mmol) and *tert*-butyl alcohol (0.09 g, 0.11 mL, 1.23 mmol) in THF (2.5 mL) and ammonia (30 mL) was added sodium (0.104 g, 4.56 mmol) in small pieces at -78 °C. After 50 minutes, isoprene (few drops) was added until the blue coloration dissipated and a dark yellow solution resulted. Allyl bromide (3.2 mL, 36.99 mmol) was added into the flask in one portion. The resulting solution was vigorously stirred at -78 °C

for 3 h, quenched with water (5 mL). The reaction mixture was allowed to warm to room temperature while ammonia got evaporated. Extracted with dichloromethane (30 mL  $\times$  3), dried over Na<sub>2</sub>SO<sub>4</sub> and concentrated. Purification by column chromatography (acetone-petroleum ether 2:8 $\rightarrow$ 3:7) afforded **9** as brown colored thick liquid (0.139 g, 46% yield and 97.9% de). Diastereomeric ratio was determined by HPLC analysis (Atlantis RP-18 (250  $\times$  4.6mm) column, acetonitrile-water (40:60) as an eluent, 1.0 mL/min,  $\lambda$  = 224nm, 25 °C). The retention times of major isomer and minor isomer were 5.33 and 6.19 minutes, respectively. This compound upon crystallization with dichloromethane - *n*-pentane gave single diastereomer as colorless crystals.

(R<sub>f</sub> = 0.3 acetone: petroleum ether 3:7) mp = 105.5-106.5 °C; [ $\alpha$ ]<sub>D</sub><sup>25</sup> = + 133.746° (*c* = 2.6, CHCl<sub>3</sub>);

IR (film)  $\nu_{\max}$  = 1688, 1630, 1412, 1352 cm<sup>-1</sup>;

<sup>1</sup>H NMR (400 MHz, CDCl<sub>3</sub>) = 5.87-5.79 (m, 2H), 5.66-5.55 (m, 1H), 5.1-5.02 (m, 2H), 4.28 (dd, *J* = 10.8, 2.2 Hz, 1H), 4.2-4.07 (m, 3H), 3.9 (t, *J* = 10.5 Hz, 1H), 3.62-3.48 (m, 2H), 2.66 (d, *J* = 7.5 Hz, 2H), 2.11-2.03 (m, 1H), 1.90-1.73 (m, 2H), 1.6-1.51 (m, 1H);

<sup>13</sup>C NMR (100 MHz, CDCl<sub>3</sub>) = 169.5, 161.6 132.1, 126.9, 125.1, 119.2, 72.7, 54.9, 52.1, 49.5, 48.1, 42.0, 29.2, 22.3;

HR-MS (EI): calcd for C<sub>14</sub>H<sub>18</sub>N<sub>2</sub>O<sub>2</sub>: 246.13683. Found: 246.13783.

#### **X-ray Crystal Structure Analysis For 9** (C<sub>14</sub>H<sub>18</sub>N<sub>2</sub>O<sub>2</sub>) (CCDC-783953)

**Crystal Data:** Single crystals of the compound were grown by slow evaporation of compound **9** in dichloromethane and *n*-pentane. Colourless crystal of approximate size 0.30 x 0.26 x 0.14 mm, was used for data collection on *Bruker SMART APEX* CCD diffractometer using Mo K $\alpha$  radiation with fine focus tube with 50kV and 30mA. Crystal to detector distance 6.05 cm, 512 x 512 pixels / frame, hemisphere data acquisition. Total frames = 1271, Oscillation / frame -0.3°, exposure / frame = 5.0 sec / frame, maximum detector swing angle = -30.0°, beam center = (260.2, 252.5), in plane spot width = 1.24, SAINT integration,  $\theta$  range = 2.09 to 25.0°, completeness to  $\theta$  of 25.0° is 100.0%. SADABS correction applied, C<sub>14</sub>H<sub>18</sub>N<sub>2</sub>O<sub>2</sub>, *M* = 246.30. Crystals belong to Tetragonal, space group P4<sub>3</sub>2<sub>1</sub>2, *a* = 11.0581(5), *b* = 11.0581(5), *c* = 20.481(4) Å, *V* = 2504.5(5) Å<sup>3</sup>, *Z* = 8, *D*<sub>c</sub> = 1.306 g /cc,  $\mu$  (MoK $\alpha$ ) = 0.088 mm<sup>-1</sup>, *T* = 150(2) K, 17820 reflections measured, 2210 unique [*I* > 2 $\sigma$ (*I*)], *R* value 0.0309, *wR*<sub>2</sub> = 0.0815. All the data were corrected for Lorentzian, polarisation and absorption effects. SHELX-97 (ShelxTL)<sup>ref</sup> was used for structure solution and full matrix least squares refinement on *F*<sup>2</sup>. Hydrogen atoms were

included in the refinement as per the riding model. X-ray analysis revealed the relative conformation of the molecule at C4a and C9a as *S* and *S* configuration.

The disordered atoms C13 and C14 have been refined with the split occupancies, C13 and C13<sup>1</sup> have 0.5 occupancies, while C14 has 0.6 and C14<sup>1</sup> has 0.4 occupancies respectively.

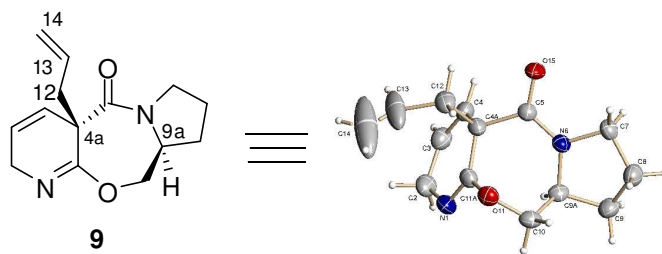

**Figure 1:** ORTEP diagram of **9**. Ellipsoids are drawn at 50% probability.

**(S)-Methyl 3-allyl-2-oxo-1, 2, 3, 6-tetrahydropyridine-3-carboxylate (**11**):**

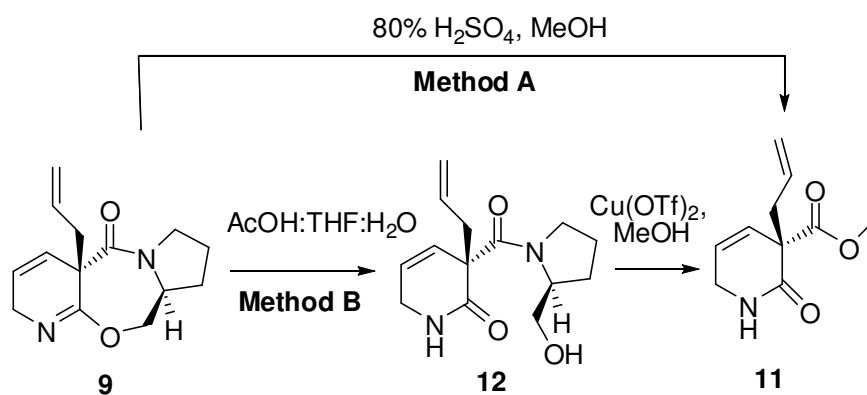

**Method A:** A solution of **9** (0.39 g, 1.59 mmol) in methanol (8 mL) and 80% sulfuric acid (1 mL) was stirred at room temperature for 75 h. The methanol was evaporated under reduced pressure and the residue was basified with the saturated sodium bicarbonate solution, stirred for ten minutes. The mixture was extracted with dichloromethane (3 × 20 mL) and the combined organic extracts were dried over Na<sub>2</sub>SO<sub>4</sub> and concentrated in vacuo. Purification by column chromatography (SiO<sub>2</sub>, ethyl acetate:petroleum ether, 2:3→3:2) afforded **11** (0.14 g) as a white solid (45% yield and 19% enantiomeric excess). Enantiomeric excess was determined by HPLC analysis {Chiralcel OD-H (250 × 4.6mm) column, isopropanol–petroleum ether (10:90) as an eluent}, 0.5 mL/min (265psi), λ = 220nm, 25 °C, the retention times of (+) - isomer and (–) - isomer being 27.36 and 52.35 minutes, respectively.

**Method B:** To a stirred solution of **9** ( 0.5 g, 2.03 mmol) in THF (8 mL) was added glacial acetic acid (1 mL) and water (1 mL) at room temperature. After stirring for 20 h, it was neutralized with

saturated NaHCO<sub>3</sub> solution, extracted with dichloromethane (3 × 25 mL), dried over sodium sulfate, filtered, and concentrated under reduced pressure. The residue was purified by silica gel column chromatography (acetone-petroleum ether 1:1) to afford pure **12** (0.477 g, 89%). mp = 141-142 °C; (R<sub>f</sub> = 0.34 acetone: petroleum ether 7:3); [ $\alpha$ ]<sup>26</sup><sub>D</sub> = + 28.82° (CHCl<sub>3</sub>, c = 3.254);

**IR** (film)  $\nu_{\max}$  = 3401, 1679, 1658, 1412 cm<sup>-1</sup>;

**<sup>1</sup>H NMR** (200 MHz, CDCl<sub>3</sub>)  $\delta_{\text{H}}$  = 7.13 (bs, 1H), 5.96 (td, *J* = 2.9, 9.9 Hz, 1H), 5.82-5.58 (m, 2H), 5.12-5.01 (m, 2H), 4.52 (bs, 1H), 3.96 (bs, 2H), 3.59-3.5 (m, 2H), 3.42 (t, *J* = 6.6 Hz, 2H), 2.9 (dd, *J* = 7.8, 13.7 Hz, 1H), 2.6 (dd, *J* = 7, 13.8 Hz, 1H), 2.02-1.74 (m, 3H), 1.62-1.49 (m, 1H);

**<sup>13</sup>C NMR** (50 MHz, CDCl<sub>3</sub>)  $\delta_{\text{C}}$  = 170.3, 169.9, 132.4, 125.4, 122.2, 119.0, 65.8, 61.7, 54.4, 46.7, 43.6, 41.9, 27.1, 24.5;

**HR-MS** (EI): calcd for C<sub>14</sub>H<sub>20</sub>N<sub>2</sub>O<sub>3</sub>: 264.14739. Found: 264.13514.

To a stirred solution of **12** (0.21 g, 0.8 mmol) in anhydrous methanol (20 mL) was added copper (II) triflate (0.29 g, 0.8 mmol) at room temperature, stirred for 48 h, concentrated and basified with saturated sodium bicarbonate solution. The aqueous layer was extracted with dichloromethane, dried over sodium sulfate, concentrated and purified by column chromatography (SiO<sub>2</sub>, ethyl acetate: petroleum ether, 2:3→3:2) to afford **11** as a white solid (0.136 g, 87% yield as single enantiomer). Enantiomeric excess was determined by HPLC analysis {(Chiralcel OD-H (250×4.6mm) column, isopropanol- petroleum ether (10:90) as an eluent, 0.5 mL/min (265psi),  $\lambda$  = 220nm, 25 °C, the retention times of (+) - isomer being at 27.89 minutes}; mp = 88-91 °C; R<sub>f</sub> = 0.4 (SiO<sub>2</sub>, ethyl acetate:petroleum ether 4:1); [ $\alpha$ ]<sup>23</sup><sub>D</sub> = + 82.812 (CHCl<sub>3</sub>, c = 1.1);

**IR** (film)  $\nu_{\max}$  = 3226, 3078, 2952, 1731, 1660, 1236, 923 cm<sup>-1</sup>;

**<sup>1</sup>H NMR** (200 MHz, CDCl<sub>3</sub>) = 6.67 (bs, 1H), 6.0-5.92 (m, 1H), 5.76-5.55 (m, 2H), 5.18-5.04 (m, 2H), 4.12-3.85 (m, 2H), 3.71 (s, 3H), 2.98 (dd, *J* = 7.3, 13.7 Hz), 2.61 (dd, *J* = 7.2, 13.7 Hz), 2.0 (bs, 1H);

**<sup>13</sup>C NMR** (50 MHz, CDCl<sub>3</sub>) = 171.0, 168.8, 132.4, 125.5, 123.1, 119.1, 54.1, 52.8, 43.4, 39.5;

**HR-MS** (EI): calcd for C<sub>10</sub>H<sub>13</sub>NO<sub>3</sub>: 195.08954. Found: 195.08821.

**(S)-Methyl-2-oxo-3-(2-oxoethyl)-1, 2, 3, 6-tetrahydropyridine-3-carboxylate (11a):**

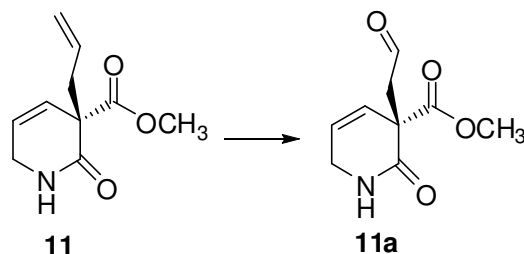

To a solution of **11** (0.15 g, 0.799 mmol) in dioxane-water (3:1, 8 mL) was added 2,6-lutidine (0.27 mL, 2.397 mmol), OsO<sub>4</sub> (2.14 % in 2-methyl-2-propanol, 4 mg, 0.0159 mmol), and NaIO<sub>4</sub> (0.683 g, 3.19 mmol). The reaction was stirred at 25 °C for 4 h and diluted with water (20 mL), extracted with CH<sub>2</sub>Cl<sub>2</sub> (25 mL × 3). The combined organic layers were washed with brine and dried over Na<sub>2</sub>SO<sub>4</sub>, concentrated and purification by column chromatography (SiO<sub>2</sub>, ethyl acetate- petroleum ether, 8:2→10:0) to obtain **11a** (0.11 g, 70%) as a colorless liquid. R<sub>f</sub> = 0.3 (SiO<sub>2</sub>, ethyl acetate-petroleum ether 6:4); [ $\alpha$ ]<sub>D</sub><sup>23</sup> = + 3.88 (*c* = 1.15, CHCl<sub>3</sub>);

**IR** (neat)  $\nu_{\text{max}}$  = 3319, 2955, 1726, 1682, 1660, 1487, 1334, 1235 cm<sup>-1</sup>;

**<sup>1</sup>H NMR** (400 MHz, CDCl<sub>3</sub>) = 9.72 (d, *J* = 1.6 Hz, 1H), 6.72 (bs, 1H), 6.01-5.97 (m, 1H), 5.68 (dt, *J* = 2.1, 9.9 Hz, 1H), 4.13-4.00 (m, 2H), 3.75 (s, 3H), 3.24 (d, *J* = 17.7 Hz, 1H), 3.02 (dd, *J* = 2.0, 17.7 Hz);

**<sup>13</sup>C NMR** (100 MHz, CDCl<sub>3</sub>) = 198.7, 170.1, 168.4, 124.6, 124.0, 53.14, 51.2, 48.1, 43.29;

**MS (ESI)** (*m/z*) = 220.100 (M + Na)<sup>+</sup>.

**(S)-Methyl 3-((1,3-dithian-2-yl)-2-oxo-1,2,3,6-tetrahydropyridine-3-carboxylate (11b):**

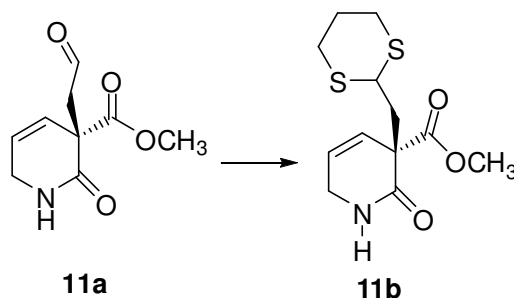

To a solution containing **11a** (0.21 g, 1.085 mmol) in anhydrous CH<sub>2</sub>Cl<sub>2</sub> (25 mL) were added 1,3-propanedithiol (0.152 g, 0.14 mL, 1.41 mmol) and boron trifluoride etherate (1.23 g, 1.1 mL, 8.68 mmol). The mixture was refluxed for 12 h, cooled to room temperature and quenched with aqueous NaHCO<sub>3</sub> (10 mL). The aqueous layer was extracted with CH<sub>2</sub>Cl<sub>2</sub>, washed with water and dried over sodium sulfate, concentrated and purified by column chromatography (SiO<sub>2</sub>,

ethyl acetate-petroleum ether, 6:4→7:3) to afford **11b** (0.251 g, 81%) as a gummy compound.  $R_f = 0.45$  (SiO<sub>2</sub>, EtOAc);  $[\alpha]_D^{26} = +102.42^\circ$  ( $c = 2.75$ , CHCl<sub>3</sub>); IR (neat)  $\nu_{\max} = 3213, 2902, 1738, 1682, 1662, 1488, 1433, 1229\text{ cm}^{-1}$ ; <sup>1</sup>H NMR (400 MHz, CDCl<sub>3</sub>) = 6.87 (bs, 1H), 6.02- 5.97 (m, 1H), 5.67 (dt,  $J = 10.0, 2.1$  Hz, 1H), 4.10-3.97 (m, 2H), 3.85 (dd  $J = 9.2, 5.5$  Hz, 1H), 3.71 (s, 3H), 2.98 (dd,  $J = 14.6, 9.2$  Hz, 1H), 2.95-2.84 (m, 2H), 2.67-2.61 (m, 1H), 2.46 (dd,  $J = 14.56, 5.40$  Hz, 1H), 2.01-1.95 (m, 1H), 1.94-1.84 (m, 1H), 1.75 (s, 1H); <sup>13</sup>C NMR (50 MHz, CDCl<sub>3</sub>) = 170.5, 168.7, 124.2, 123.8, 53.2, 52.8, 43.3, 41.7, 38.9, 28.5, 28.1, 25.1; HR-MS(ESI): calcd for C<sub>12</sub>H<sub>17</sub>NO<sub>3</sub>S<sub>2</sub>: 287.06498. Found: 287.05690.

**(S)- Methyl 3-ethyl-2-oxopiperidine-3-carboxylate (14):**

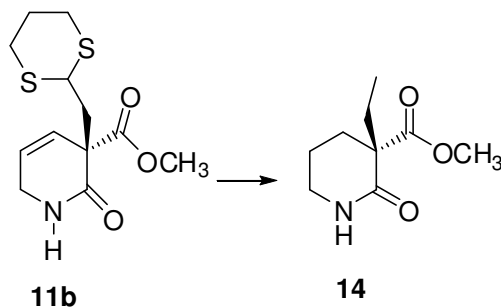

To a solution of **11b** (0.423 g, 1.47 mmol) in absolute ethanol (65 mL) was added Raney-Ni (W-2, 2 g, prewashed with absolute ethanol) followed by refluxing under a hydrogen atmosphere (1 atm) for 7 h. The reaction mixture was filtrated through celite and the filtrate was concentrated under reduced pressure, purified by column chromatography (silica gel, eluting with ethyl acetate) to obtain **14** (0.25 g, 94%) as a colorless liquid.  $R_f = 0.33$  (SiO<sub>2</sub>, ethyl acetate);  $[\alpha]_D^{27} = -48.3314$  (CHCl<sub>3</sub>,  $c = 2.45$ ); IR (neat)  $\nu_{\max} = 3300, 2953, 2880, 1732, 1666, 1491, 1449, 1247, 1199\text{ cm}^{-1}$ ; <sup>1</sup>H NMR (500 MHz, CDCl<sub>3</sub>) = 6.0 (bs, 1H), 3.74 (s, 3H), 3.37-3.28 (m, 2H), 2.2-2.16 (1H, m), 2.07-1.99 (m, 1H), 1.97-1.92 (m, 1H), 1.9-1.78 (m, 3H), 1.66(s, 1H), 0.94 (t,  $J = 7.5$  Hz, 3H); <sup>13</sup>C NMR (50 MHz, CDCl<sub>3</sub>) = 173.4, 171.1, 53.9, 52.3, 42.1, 28.8, 28.3, 19.4, 8.8; HR-MS (EI): calcd for C<sub>9</sub>H<sub>15</sub>NO<sub>3</sub>: 185.10519. Found: 185.10635.



**(R)-3-Ethyl-3-(hydroxymethyl)piperidin-2-one (14a):**

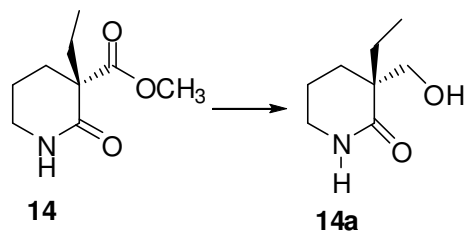

To a suspension of NaBH<sub>4</sub> (0.18 g, 4.92 mmol) and cerium chloride heptahydrate (0.252 g, 0.677 mmol) in ethanol (4 mL) was added drop wise the solution of **14** (0.08 g, 0.464 mmol) in ethanol (3 mL) for 1h. The reaction mixture was stirred for 2 days at room temperature and poured into saturated aqueous NH<sub>4</sub>Cl solution, extracted with dichloromethane (15 mL × 3). The combined organic layers were dried over Na<sub>2</sub>SO<sub>4</sub>, concentrated under reduced pressure, purified by column chromatography (SiO<sub>2</sub> acetone: petroleum ether 1:1) to afford **14a** (0.06 g, 87%) as colorless sticky liquid. R<sub>f</sub> = 0.23 (SiO<sub>2</sub>, acetone-petroleum ether 1:1); [ $\alpha$ ]<sub>D</sub><sup>27</sup> = + 13.4667 (CHCl<sub>3</sub>, *c* = 1.05);

**IR** (neat)  $\nu_{\max}$  = 3297, 2940, 2875, 1644, 1492, 1054 cm<sup>-1</sup>;

**<sup>1</sup>H NMR** (400 MHz, CDCl<sub>3</sub>) = 6.38 (bs, 1H), 3.88 (dd, *J* = 8.9, 2.5 Hz, 1H), 3.57-3.47 (m, 2H), 3.29-3.25 (m, 2H), 1.9-1.68 (m, 5H), 1.49-1.43 (m, 1H), 0.89 (t, *J* = 7.5 Hz, 3H);

**<sup>13</sup>C NMR** (125 MHz, CDCl<sub>3</sub>) = 178.2, 67.2, 45.1, 41.9, 26.6, 26.4, 19.1, 7.7;

**HR-MS** (EI): calcd for C<sub>8</sub>H<sub>15</sub>NO<sub>2</sub>: 157.11028. Found: 157.11074.

**(R)- (3-ethyl-2-oxopiperidin-3-yl)methyl 4-methylbenzenesulfonate (15):**

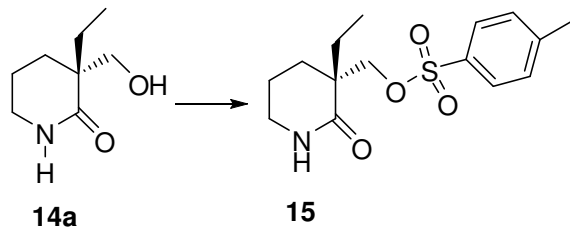

*p*-Toluenesulfonyl chloride (0.11 g, 0.601 mmol) was added in small portions to a stirred and ice-cooled solution of **14a** (0.06 g, 0.4 mmol) in anhydrous pyridine (4 mL). The reaction mixture was stirred for 48 h at ambient temperature and poured into ice water. The aqueous layer was extracted with dichloromethane, washed with saturated NaHCO<sub>3</sub> solution, dried over Na<sub>2</sub>SO<sub>4</sub>, concentrated and purified by column chromatography (SiO<sub>2</sub>, 6:4→10:0 ethyl acetate-petroleum ether) to afford **15** as white solid (0.138 g, 84%), which got crystallized from ethyl acetate-petroleum ether as colorless crystals. mp = 166-168 °C; R<sub>f</sub> = 0.45 (SiO<sub>2</sub>, EtOAc);

[ $\alpha$ ]<sub>D</sub><sup>23</sup> = - 26.7586 (CHCl<sub>3</sub>, *c* = 1.45); **IR** (neat)  $\nu_{\max}$  = 3020, 1661, 1359, 1215, 1176cm<sup>-1</sup>;

**<sup>1</sup>H NMR** (400 MHz, CDCl<sub>3</sub>) = 7.76 (d, *J* = 8.2 Hz, 1H), 7.33 (d, *J* = 8.0 Hz, 1H), 6.03 (bs, 1H), 4.18 (d, *J* = 8.9 Hz, 1H), 3.91 (d, *J* = 9.0 Hz, 1H), 3.3-3.21 (m, 2H), 2.43 (s, 3H), 1.98-1.89 (m, 1H), 1.86-1.74 (m, 3H), 1.68-1.59 (m, 1H), 1.52-1.45 (m, 1H) 0.84 (t, *J* = 7.4 Hz, 3H);  
**<sup>13</sup>C NMR** (100 MHz, CDCl<sub>3</sub>) = 173.2, 144.7, 132.4, 129.7, 127.8, 75.0, 45.3, 42.3, 28.2, 27.2, 21.5, 19.6, 8.3;

**HR-MS** (EI): calcd for C<sub>15</sub>H<sub>21</sub>NO<sub>4</sub>S: 311.11913. Found: 311.11887.

**(*R*)-tert-Butyl 3-ethyl-2-oxo-3-(tosyloxymethyl)piperidine-1-carboxylate (15a):**

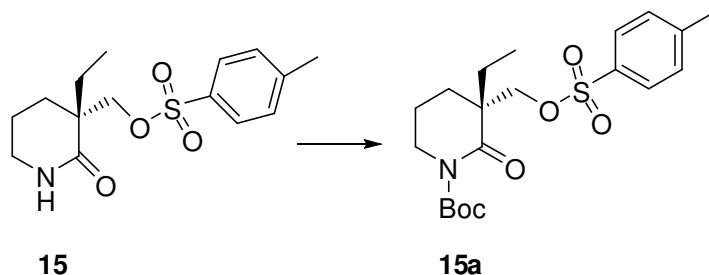

To a solution of **15** (0.64 g, 2.07 mmol) in dry dichloromethane (15 mL) was added triethylamine (0.72 mL, 5.17 mmol) and DMAP (0.025 g, 0.2 mmol). To this stirred mixture was added drop wise di-tertbutyl dicarbonate (0.7 mL, 3.1 mmol) over a period of 15 min and the mixture was stirred at ambient temperature for 12 h. The reaction mixture was concentrated under reduced pressure, purified by column chromatography (SiO<sub>2</sub>, ethyl acetate-petroleum ether 2:8) to furnish **15a** as a colorless liquid (0.81 g, 95%). *R<sub>f</sub>* = 0.27 (2:8 ethyl acetate:petroleum ether); [ $\alpha$ ]<sub>D</sub><sup>26</sup> = - 62.8914 (CHCl<sub>3</sub> *c* = 1.05);

**IR** (neat)  $\nu_{\text{max}}$  = 2976, 1765, 1717, 1367, 1177, 1150 cm<sup>-1</sup>;

**<sup>1</sup>H NMR** (200 MHz, CDCl<sub>3</sub>) = 7.75 (d, *J* = 8.28 Hz, 2H), 7.33 (d, *J* = 8.03 Hz, 2H), 4.16 (d, *J* = 9.29 Hz, 1H), 3.97 (d, *J* = 9.28 Hz, 1H), 3.65-3.54 (m, 2H), 2.43 (s, 3H), 1.98-1.89 (m, 1H), 1.88-1.75 (m, 3H), 1.64-1.54 (m, 2H), 1.48 (s, 9H), 0.81 (t, *J* = 7.53 Hz, 3H);

**<sup>13</sup>C NMR** (50 MHz, CDCl<sub>3</sub>) = 173.2, 152.8, 144.8, 132.3, 129.8, 127.8, 82.7, 74.2, 48.3, 46.9, 28.7, 28.5, 27.8, 21.5, 19.7, 8.1;

**MS** (ESI): 412.1523 (M<sup>+</sup>+H), 434.1089 (M<sup>+</sup>+Na), 450.0987 (M<sup>+</sup>+K);

**HR-MS** (EI): calcd for C<sub>20</sub>H<sub>29</sub>NO<sub>6</sub>S: 411.17156. Found: 311.11977 (-Boc).

**(3*R*)-tert-Butyl 3-ethyl-2-hydroxy-3-(tosyloxymethyl)piperidine-1-carboxylate(15b):**

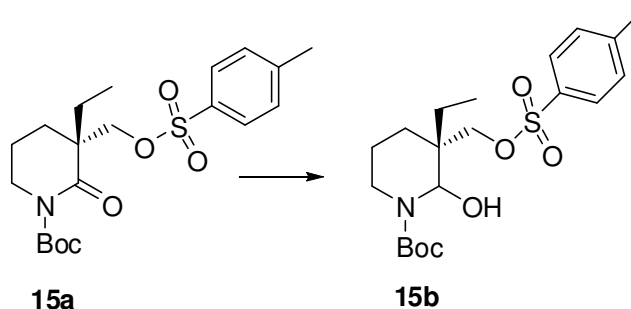

To a stirred solution of **15a** (0.137 g, 0.33 mmol) in anhydrous THF (4 mL) at -78 °C was added a solution of DIBAL-H (20 wt % solution in toluene, 0.8 mL, 0.99 mmol). After 4 h, the reaction was quenched by successive addition of saturated aqueous solution of NH<sub>4</sub>Cl (3.5 mL) and an aqueous solution of Na<sub>2</sub>CO<sub>3</sub> (10% wt/v, 2.5 mL). The mixture was extracted with dichloromethane, dried over Na<sub>2</sub>SO<sub>4</sub>, concentrated and purified by column chromatography (SiO<sub>2</sub>, ethyl acetate-petroleum ether 2.5:7.5) to afford **15b** as colorless gum (0.133 g, 97%). R<sub>f</sub> = 0.37, (2.5:7.5 ethyl acetate-petroleum ether); [ $\alpha$ ]<sub>D</sub><sup>26</sup> = - 5.3059 (CHCl<sub>3</sub> c = 1.85);

**IR** (neat)  $\nu_{\max}$  = 3414, 2972, 1673, 1366, 1176 cm<sup>-1</sup>;

**<sup>1</sup>H NMR** (400 MHz, CDCl<sub>3</sub>) = 7.77 (d, *J* = 8 Hz, 2H), 7.33 (d, *J* = 8 Hz, 2H), 5.3 (bs, 1H), 4.01-3.73 (m, 3H), 3.06-2.99 (m, 1H), 2.44(s, 3H), 1.78 (s, 1H), 1.49-1.34 (m, 15H), 0.66 (t, *J* = 7.5 Hz, 3H);

**<sup>13</sup>C NMR** (100 MHz, CDCl<sub>3</sub>) = 155.5, 144.7, 132.4, 129.7, 127.8, 80.5, 75.4 71.8, 68.5, 40.4, 28.2, 26.2, 25.3, 21.5, 20.0, 6.4;

**MS** (ESI): 436.0946 (M<sup>+</sup>+Na), 452.0846 (M<sup>+</sup>+K).

**(3-Ethyl-3, 4, 5, 6-tetrahydropyridin-3-yl) methyl 4-methylbenzenesulfonate (4):**

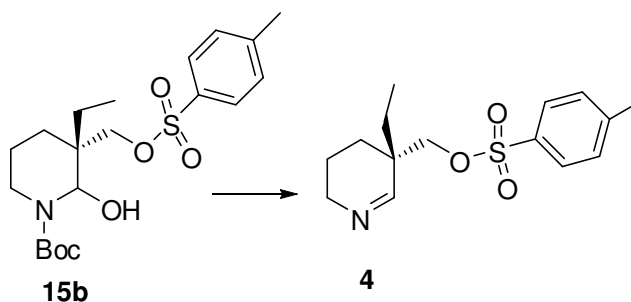

To a stirred solution of **15b** (0.11 g, 0.278 mmol) in 5 mL of dry dichloromethane was added trifluoroacetic acid (0.2 mL, 2.78 mmol) drop by drop, stirred at ambient temperature for 4 h. Concentrated, neutralized with saturated aqueous sodium hydrogen carbonate and extracted with dichloromethane. The organic layer was separated, dried over sodium sulfate, concentrated under

reduced pressure and purified by column chromatography (SiO<sub>2</sub>, ethyl acetate) to afford pure imine **4** as a colorless liquid (0.07 g, 90% yield, single enantiomer ). Enantiomeric excess was determined by HPLC analysis and compared with the racemic imine (Chiralcel OJ-H (250×4.6mm) column, Isopropanol–petroleum ether (15:85) as an eluent), 0.7 mL/min (33 Kgf), λ = 254nm, 25 °C, the retention times of (-) – isomer and (+)-isomer being 21.408 and 23.867 minutes, respectively. (R<sub>f</sub>: 0.4, ethyl acetate); [α]<sup>28.3</sup><sub>D</sub> = - 42.2220 (CHCl<sub>3</sub> c= 2.0);

**IR** (neat) ν<sub>max</sub> = 2941, 1654, 1363, 1176 cm<sup>-1</sup>;

**<sup>1</sup>H NMR** (500 MHz, CDCl<sub>3</sub>) = 7.77 (d, *J* = 8.0 Hz, 2H), 7.38 (bs, 1H), 7.34 (d, *J* = 8.0 Hz, 2H), 3.85, 3.81 (2 sets of doublet, *J* = 9.3 Hz, 2H), 3.53-3.42 (m, 2H), 2.44 (s, 3H), 1.56-1.39 (m, 6H), 0.81 (t, *J* = 7.3 Hz, 3H);

**<sup>13</sup>C NMR** (125 MHz, CDCl<sub>3</sub>) = 164.7, 145.0, 132.3, 129.8, 127.8, 127.8, 72.9, 49.1, 39.9, 27.2, 25.3, 21.6, 18.7, 7.6;

**HR-MS** (EI): calcd for C<sub>15</sub>H<sub>21</sub>NO<sub>3</sub>S: 295.12421. Found: 295.11549.

#### **Methyl 2-(3-(2-chloroethyl)-1H-indol-2-yl) acetate (**5**):**

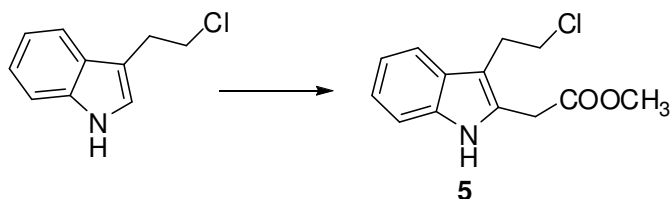

To a stirred solution of 3-(2-chloroethyl)-1H-indole (0.8 g, 4.46 mmol) and triethyl amine (0.74 mL, 5.35 mmol) in anhydrous THF (20 mL) was added drop wise *t*-BuOCl (0.63 mL, 5.35 mmol) dissolved in dry THF (2 mL) over a period of 10 minutes at -78 °C. After 40 minutes, the silylenol ether (1.9 mL, 8.92 mmol) was added followed by BF<sub>3</sub>·OEt<sub>2</sub> (1.1 mL, 8.92 mmol). The solution was warmed to ambient temperature over 6 h and stirred at the same temperature for 6 h, quenched with aqueous NaHCO<sub>3</sub> (10 mL), extracted with dichloromethane, dried over sodium sulfate and concentrated under reduced pressure. The crude residue was purified by column chromatography (SiO<sub>2</sub>, ethyl acetate-petroleum ether, 1.5:8.5) to obtain **5** (0.685 g, 61%) as a thick liquid. This compound upon crystallization with cyclohexane-ethyl acetate gave colorless crystalline solid; mp = 59-60 °C; R<sub>f</sub> = 0.42 (SiO<sub>2</sub>, ethyl acetate-petroleum ether 2.5: 7.5, Iodine/PMA);

**IR** (neat) = 3457, 3019, 1735, 1438, 1460, 1216cm<sup>-1</sup>;

**<sup>1</sup>H NMR** (200 MHz, CDCl<sub>3</sub>) = 8.65 (brs, 1H), 7.53-7.51 (m, 1H), 7.37-7.33 (m, 1H), 7.23-7.08 (m, 2H), 3.84 (s, 2H), 3.76 (s, 3H), 3.72 (t, *J* = 7.4 Hz, 2H), 3.2 (t, *J* = 7.4 Hz, 2H);

$^{13}\text{C}$  NMR (50 MHz,  $\text{CDCl}_3$ ) = 170.8, 135.5, 127.7, 127.4, 122.0, 119.5, 117.9, 110.9, 109.6, 52.3, 44.5, 31.6, 27.8;

HR-MS (EI): calcd for  $\text{C}_{13}\text{H}_{14}\text{ClNO}_2$ : 251.07131. Found: 251.05374

**(+)-Vincadifformine (1):**

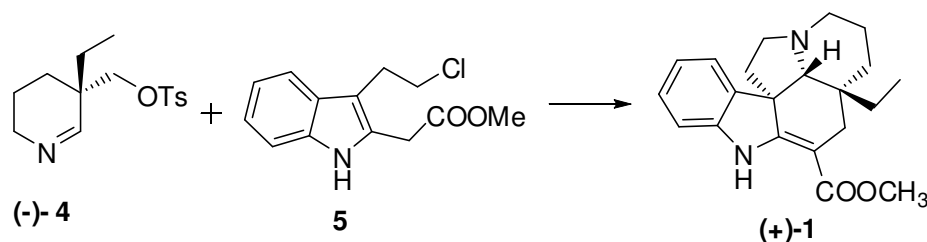

The stirred solution of methyl-2-(3-(2-chloroethyl)-1H-indol-2-yl)acetate (**5**) (0.101 g, 0.402 mmol) and potassium iodide (0.467 g, 2.81 mmol) in 4 mL of anhydrous DMF was degassed three to four times in presence of argon and heated at 90 °C for 3 h, cooled to room temperature. Imine (-)-**4** (0.119 g, 0.402 mmol) dissolved in 2 mL anhydrous DMF was added to the flask. After heating at 135 °C to 140 °C for 3 h, it was cooled to room temperature, diluted with dichloromethane, quenched with ice water. The organic layer was separated, dried over  $\text{Na}_2\text{SO}_4$ , concentrated, purified by column chromatography ( $\text{SiO}_2$ , ethyl acetate- petroleum ether 15:85) to afford vincadifformine (**1**) (0.04 g, 35%, >99% ee). Enantiomeric excess was determined by HPLC analysis by comparing with the racemic **1** (Chiralcel OD-H (250×4.6 mm) column, ethanol:petroleum ether:TFA (15:85:0.1) as an eluent), 0.5 mL/min (26 Kgf),  $\lambda = 220$  nm, 25 °C, the retention times of (+) – isomer and (-)-isomer being 14.942 and 18.983 minutes, respectively.  $R_f$ : 0.37 (1.5:8.5 ethyl acetate: petroleum ether);  $[\alpha]_D^{28} = +550.760$  (EtOH,  $c = 0.2$ );

IR (neat) = 3368, 2934, 2774, 1674, 1608, 1463, 908, 733  $\text{cm}^{-1}$ ;

$^1\text{H}$  NMR (400 MHz,  $\text{CDCl}_3$ ) = 8.89 (bs, 1H), 7.18 (d,  $J = 7.2$  Hz, 1H), 7.11 (dt,  $J = 7.5, 1.0$  Hz, 1H), 6.84 (dt,  $J = 7.3, 0.75$  Hz, 1H), 6.78 (d,  $J = 7.7$  Hz, 1H), 3.75 (s, 3H), 3.12 (br d,  $J = 9.3$  Hz, 1H), 2.91 (t,  $J = 7.2$  Hz, 1H), 2.71 (d,  $J = 15.1$  Hz, 1H), 2.58-2.52 (m, 1H), 2.45 (s, 1H), 2.43-2.35 (m, 1H), 2.26 (dd,  $J = 15.1, 1.7$  Hz, 1H), 2.08-2.01 (m, 1H), 1.88-1.81 (m, 1H), 1.80-1.75 (m, 1H), 1.69 (dd,  $J = 11.5, 4.5$  Hz, 1H), 1.56-1.50 (m, 1H), 1.27-1.20 (m, 1H), 0.96 (dd,  $J = 13.0, 6.7$  Hz, 1H), 0.62 (m, 1H), 0.56 (t,  $J = 6.8$  Hz, 3H);

$^{13}\text{C}$  NMR (100 MHz,  $\text{CDCl}_3$ ) = 169.3, 167.9, 143.4, 138.1, 127.5, 121.1, 120.6, 109.4, 92.7, 72.8, 55.6, 51.8, 51.1, 50.8, 45.4, 38.3, 33.0, 29.4, 25.6, 22.3, 7.2;

HR-MS (EI): calcd for  $\text{C}_{21}\text{H}_{26}\text{N}_2\text{O}_2$ : 338.19943. Found: 338.20066.

### Attempts towards the isolation of Spiro intermediate (7):

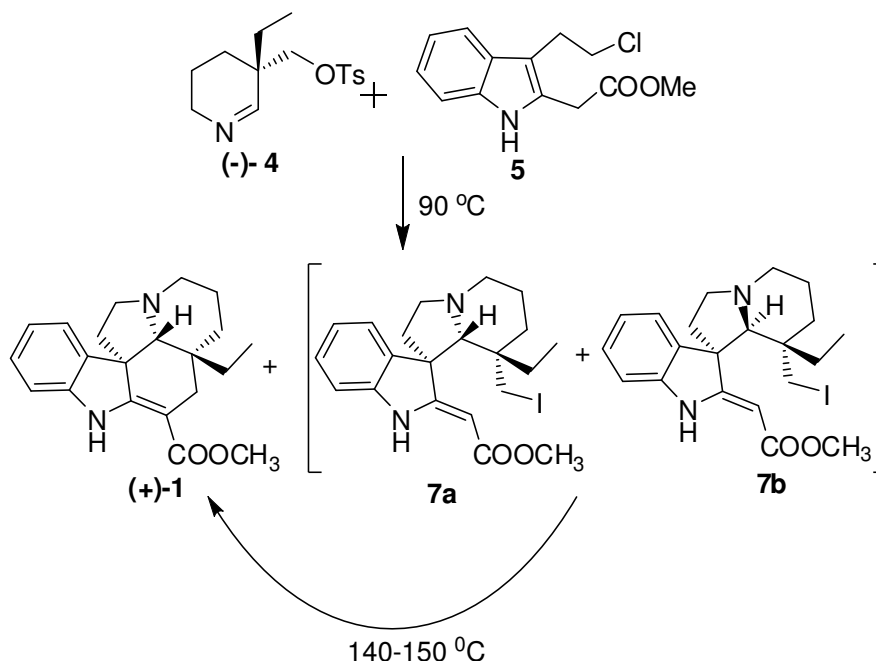

The stirred solution of methyl-2-(3-(2-chloroethyl)-1H-indol-2-yl)acetate (**5**, 0.07 g, 0.287 mmol), imine **(-)-4** (0.08 g, 0.287 mmol) and sodium iodide (0.258 g, 1.72 mmol) in 6 mL of anhydrous acetonitrile was degassed three to four times in presence of argon and refluxed for 12 h, cooled to room temperature and quenched the reaction with ice water. The aqueous layer was extracted with dichloromethane, dried over sodium sulfate and concentrated.

The isolation of the diastereomeric mixture of **7** through column chromatography by using silicagel or alumina was not successful due to their poor stability.

HPLC–LCMS analysis indicates the formation of (+)-vincadifformine (**1**), diastereomeric mixture (89:11) of (**7**) along with the indole fragment. The diastereomeric ratio of **7** was determined by HPLC analysis using Kromasil RP-18 (150×4.6mm) column, methanol:acetonitrile:triethyl ammonium acetate(0.1M. pH-7) (40:40:20) and (35:45:20) as an eluent, 1.0 mL/min (1140psi),  $\lambda = 254\text{nm}$ , 25 °C, the retention time of diastereomers being at 8.31 and 9.19 minutes.

Diastereomeric mixture of **7** was found converting to **1** by heating at 145 °C in DMF for 3 h, determined by HPLC analysis using Kromasil RP-18 (150 × 4.6 mm) column, methanol:water (85:15) as an eluent, 1.0 mL/min (1260psi),  $\lambda = 254\text{nm}$ , 25 °C, the retention time of vincadifformine and spiro compound **7** being at 7.37 and 8.27 minutes, respectively.

## HPLC and Mass spectrometric analysis of spiro intermediate 7 and Vincadifformine 1:

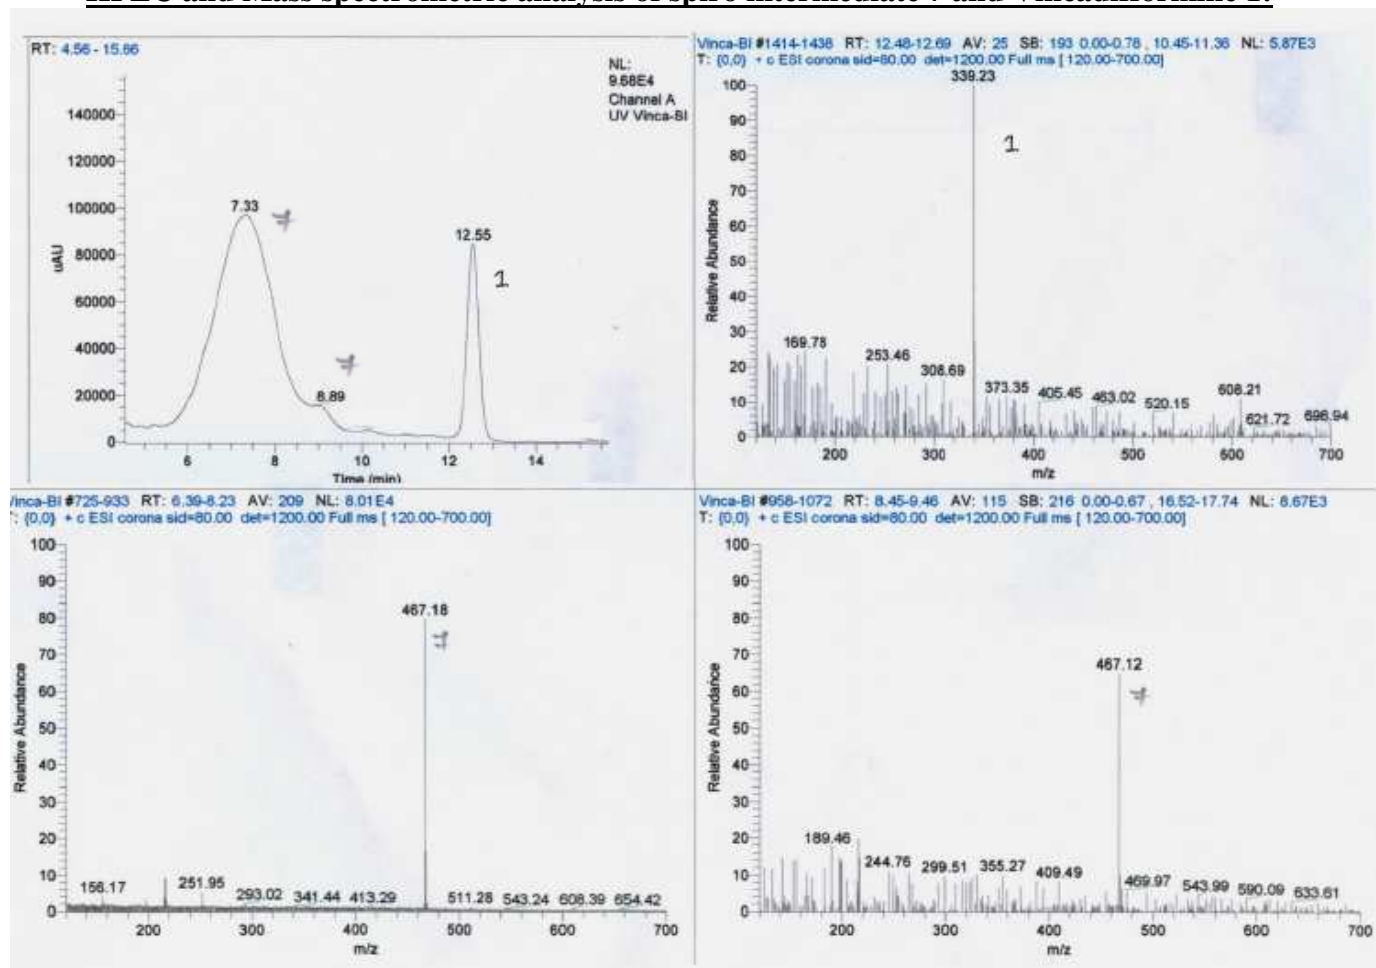

Column : Kromasil RP-18 (150×4.6mm)  
 Mobile Phase : MeOH:CH<sub>3</sub>CN:TEAA(pH-7) (35:45:20)  
 Wavelength: 254nm  
 Flow rate : 1.0 mL/min (1140psi)  
 Sample conc : 1mg/1mL (inj vol-10μL)

Chrom Type: HPLC Channel : 1

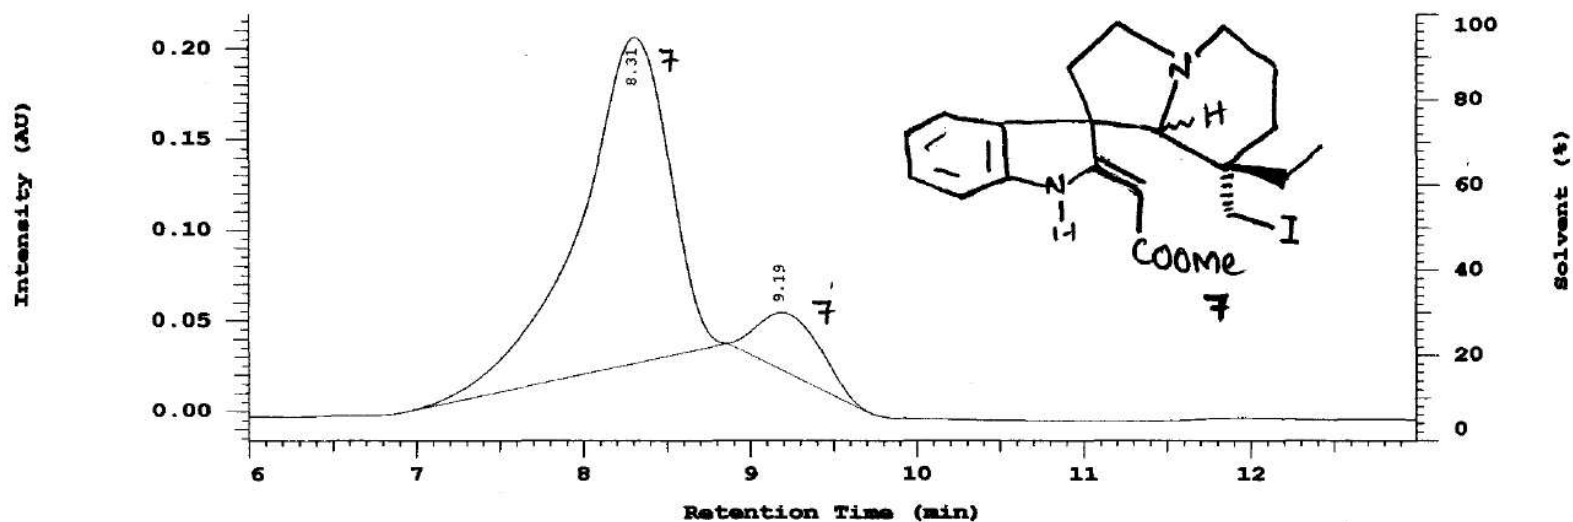

| No. | RT   | Height | Area    | Area %  |
|-----|------|--------|---------|---------|
| 1   | 8.31 | 89724  | 3356300 | 88.617  |
| 2   | 9.19 | 15882  | 431127  | 11.383  |
|     |      | 105606 | 3787427 | 100.000 |

COLUMN : -Kromasil RP-18 (150 X 4.6mm)  
 MOBILE PHASE : - MeOH:ACN:TEAA (PH-7) (40:40:20)  
 WAVELENGTH : - 254nm (D-IN)  
 FLOW RATE : - 1.0 ml/min ( 1140psi)  
 SAMPLE CONC : -1mg/1ml (Inj vol-10ul)



RT: 6.00 - 12.00

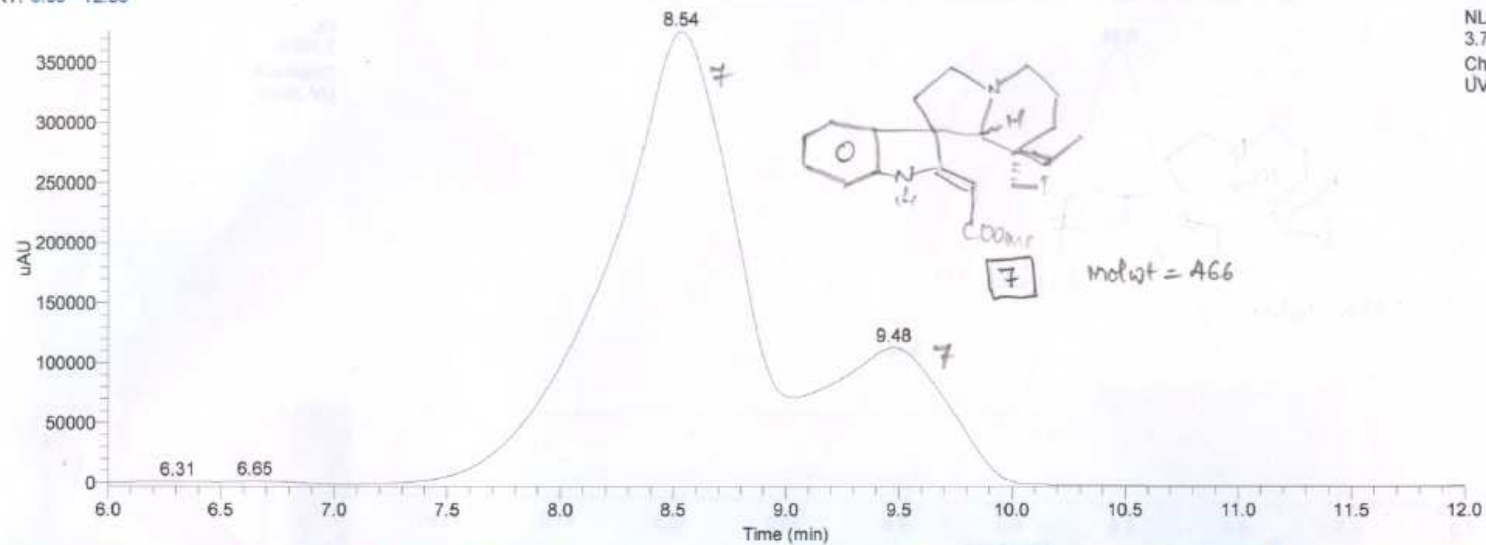

NL:  
3.76E5  
Channel A  
UV JK-04

JK-04 #938-1002 RT: 8.23-8.79 AV: 65 SB: 71 7.05-7.38, 10.46-10.73 NL: 2.41E5  
T: (0,0) + c ESI corona sid=80.00 det=1200.00 Full ms [ 300.00-700.00]

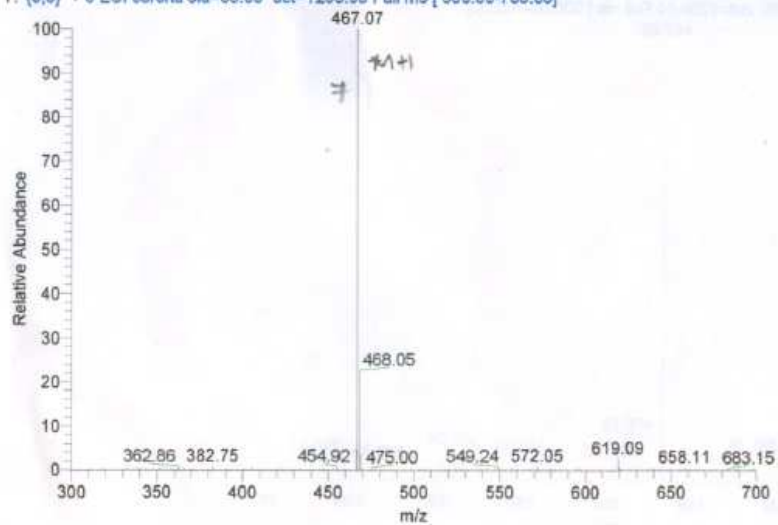

JK-04 #1043-1100 RT: 9.15-9.65 AV: 58 SB: 221 0.22-1.26, 15.11-15.99 NL: 1.50E4  
T: (0,0) + c ESI corona sid=80.00 det=1200.00 Full ms [ 300.00-700.00]

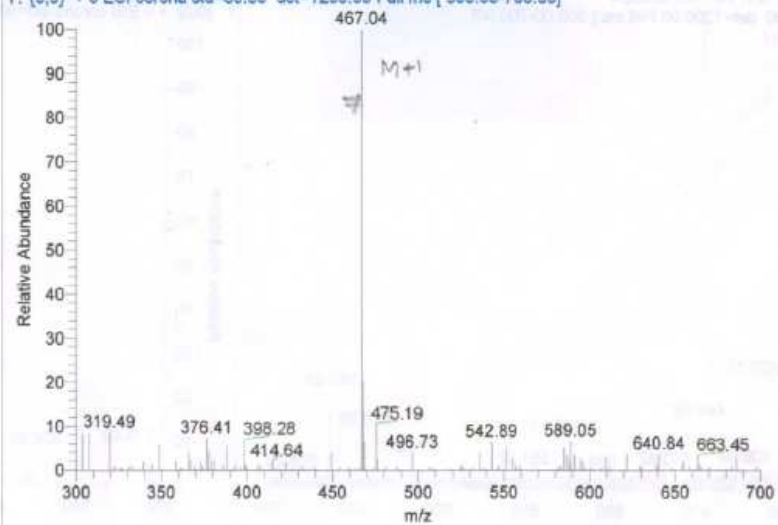

Conversion of Spiro 7 to Vincadifformine (1): HPLC and Mass spectrometric analysis of aliquots at different interval of times

Chrom Type: HPLC Channel : 1

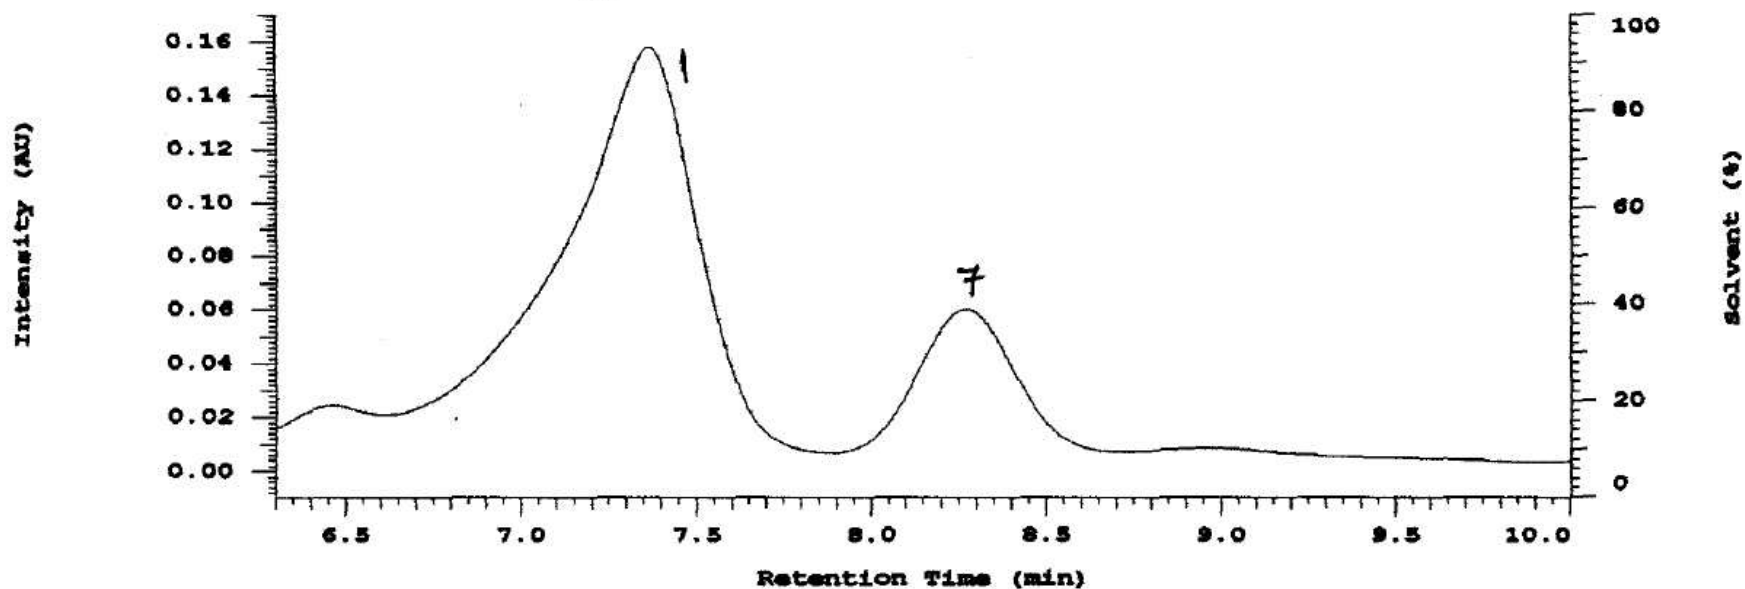

Peak Quantitation: AREA

Calculation Method: AREA%

| No. | RT   | Height | Area    | Area %  |
|-----|------|--------|---------|---------|
| 1   | 7.37 | 71759  | 1770272 | 79.151  |
| 2   | 8.27 | 25605  | 466311  | 20.849  |
|     |      | 97364  | 2236583 | 100.000 |

Chrom Type: HPLC Channel : 1

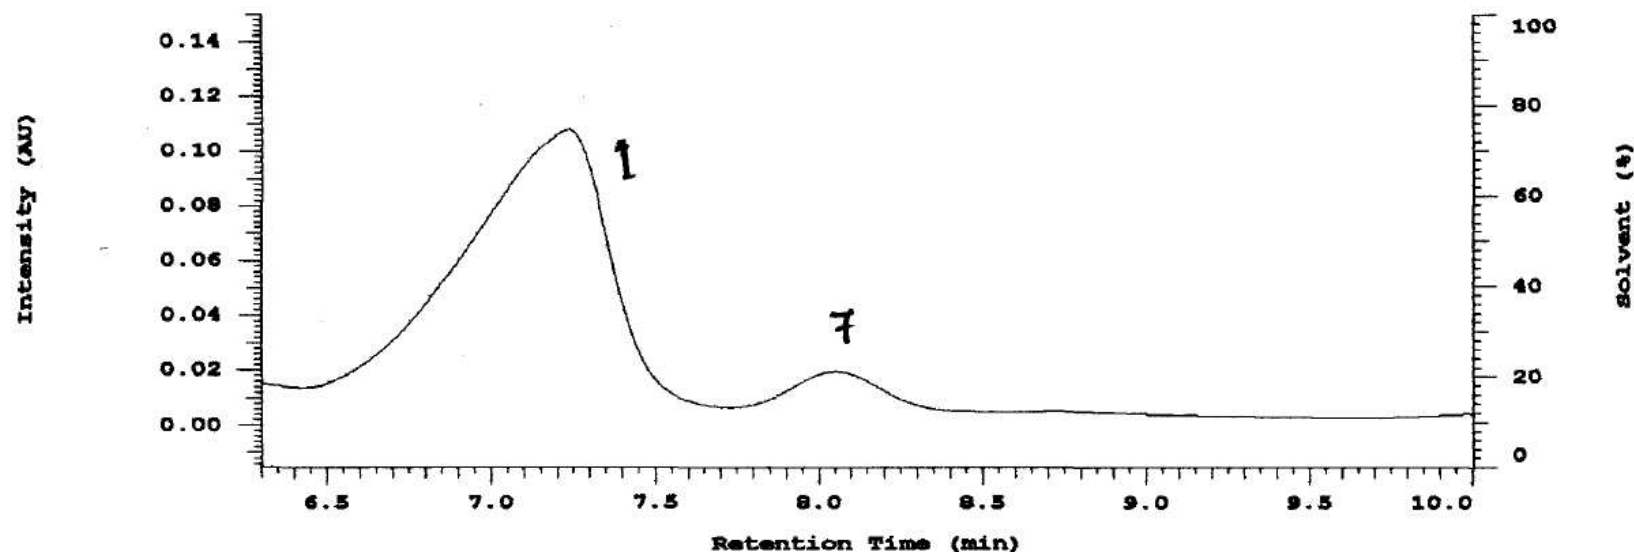

Peak Quantitation: AREA

Calculation Method: AREA%

| No. | RT   | Height | Area    | Area %  |
|-----|------|--------|---------|---------|
| 1   | 7.24 | 49011  | 1437454 | 96.315  |
| 2   | 8.05 | 4336   | 54996   | 3.685   |
|     |      | 53347  | 1492450 | 100.000 |

Chrom Type: HPLC Channel : 1

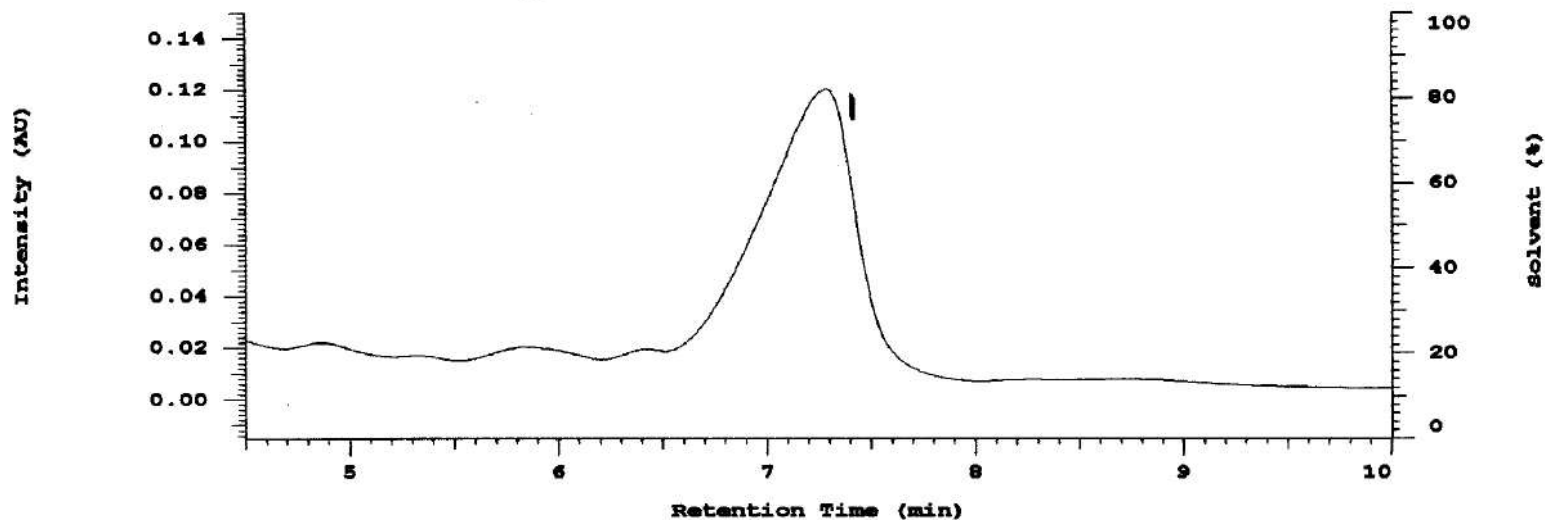

Peak Quantitation: AREA

Calculation Method: AREA%

| No. | RT   | Height | Area    | Area %  |
|-----|------|--------|---------|---------|
| 1   | 7.29 | 52165  | 1561137 | 100.000 |
|     |      | 52165  | 1561137 | 100.000 |

Group Leader :-Dr.Ganesh Pandey  
Column :Kromasil RP-18(150 X 4.6mm)  
M.P. :A)MEOH:H2O(85:15)

Flow Rate :-1.0ml/min (1260psi)  
Sample conc :x mg/0.5 ml  
Inj vol-10ul

WAVELENGTH :254nm

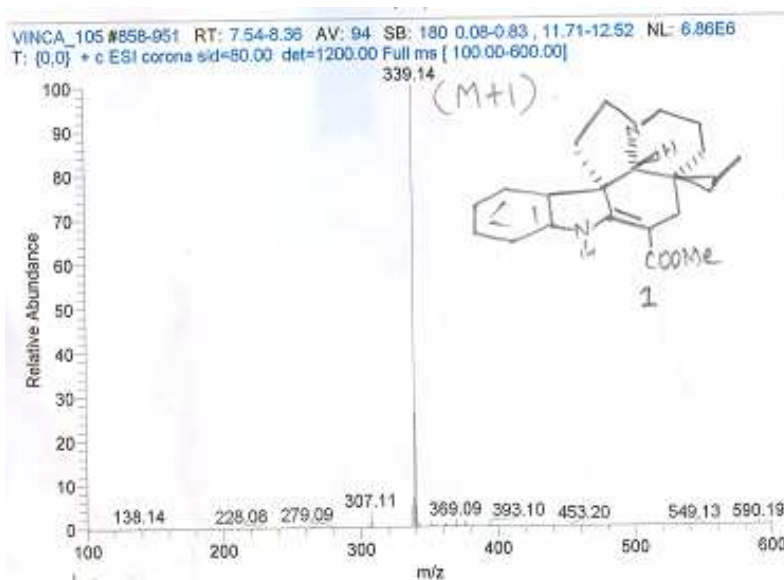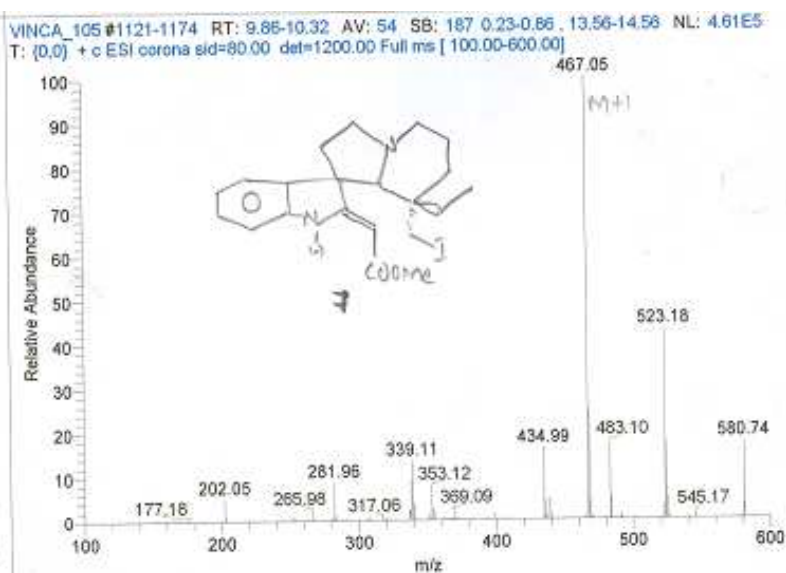

**Methyl 2-(spiro[cyclopropane-1,3'-indoline]-2'-ylidene)acetate:**

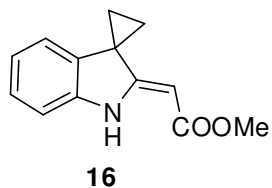

$R_f$ : 0.4 (1.5:8.5 ethyl acetate: petroleum ether); **IR** (neat) = 3403, 2925, 1655, 1456, 743 $\text{cm}^{-1}$ ;

**$^1\text{H}$  NMR** (200 MHz,  $\text{CDCl}_3$ ) = 10.0 (brs, 1H), 7.2-7.12(m, 1H), 6.95-6.87(m, 2H), 6.81-6.77(m, 1H), 4.37(s, 1H), 3.69(s, 3H), 1.7-1.63(m, 2H), 1.45-1.39(m, 2H);

**$^{13}\text{C}$  NMR** (50 MHz,  $\text{CDCl}_3$ ) = 170.4, 167.7, 143.5, 132.7, 126.9, 121.0, 118.0, 109.0, 74.2, 50.4, 23.0;

**MS** (ESI): 216.09( $\text{M}^+\text{+H}$ )

**II)  $^1\text{H}$  and  $^{13}\text{C}$  spectra:**

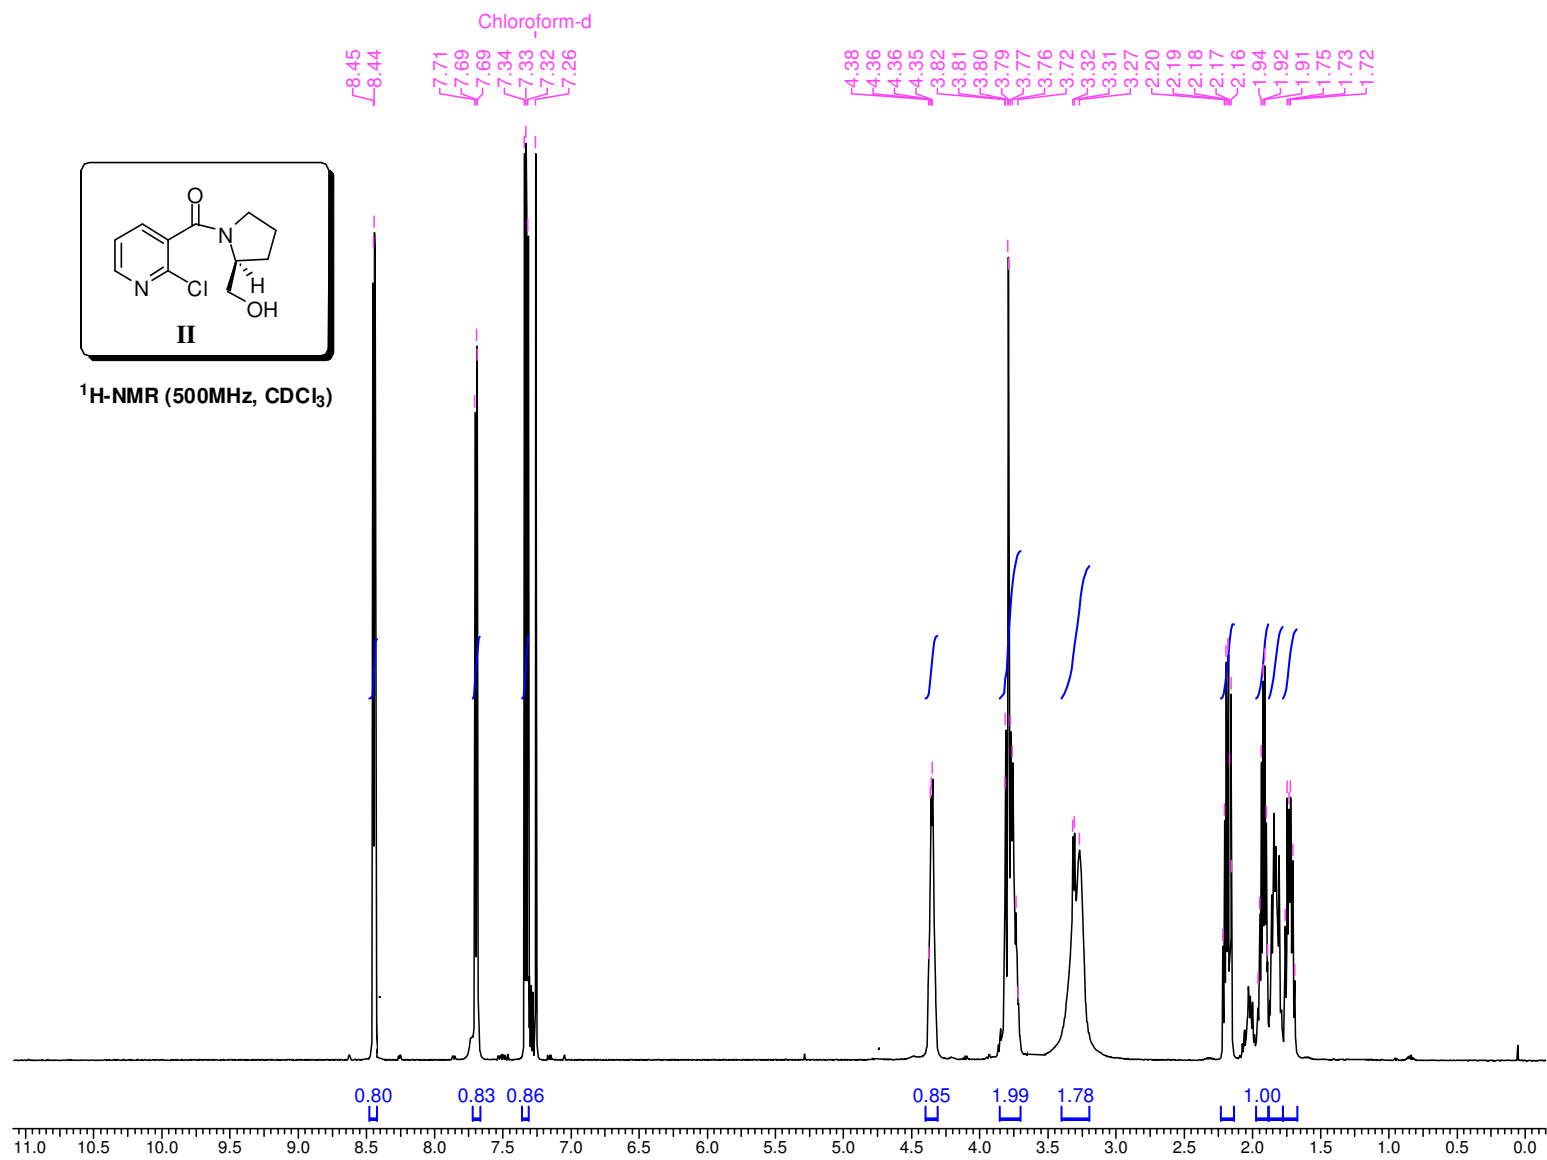

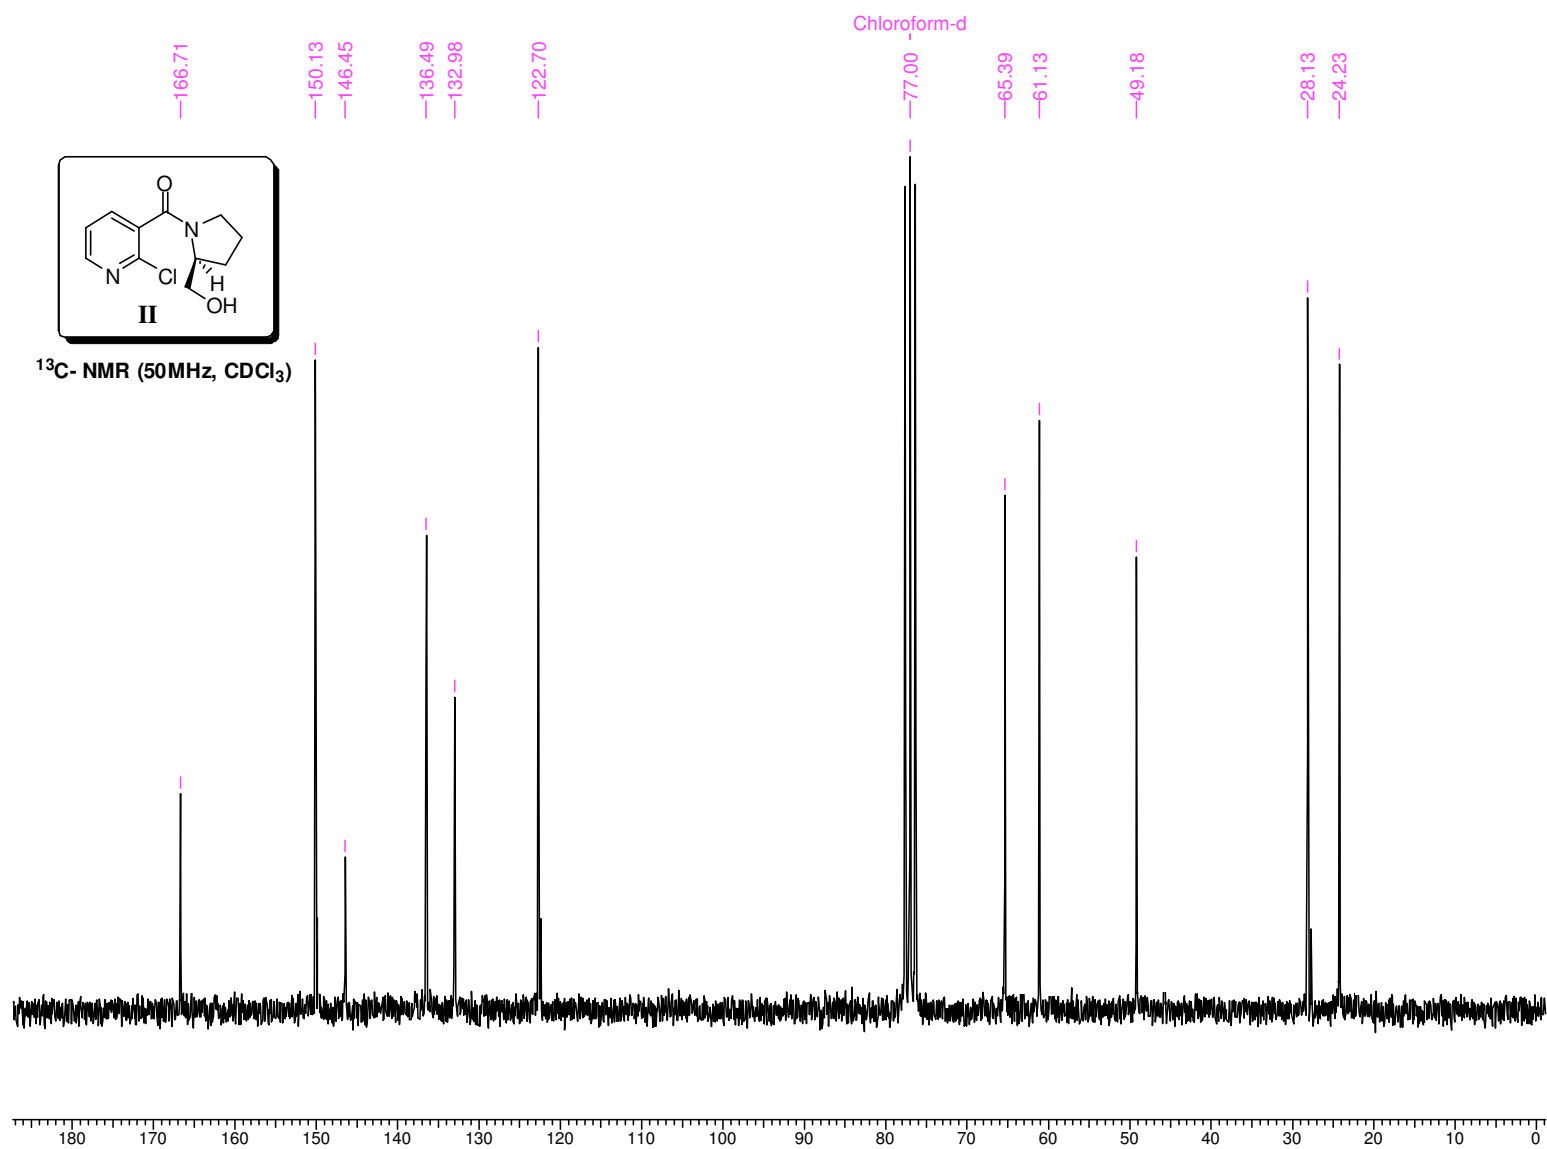

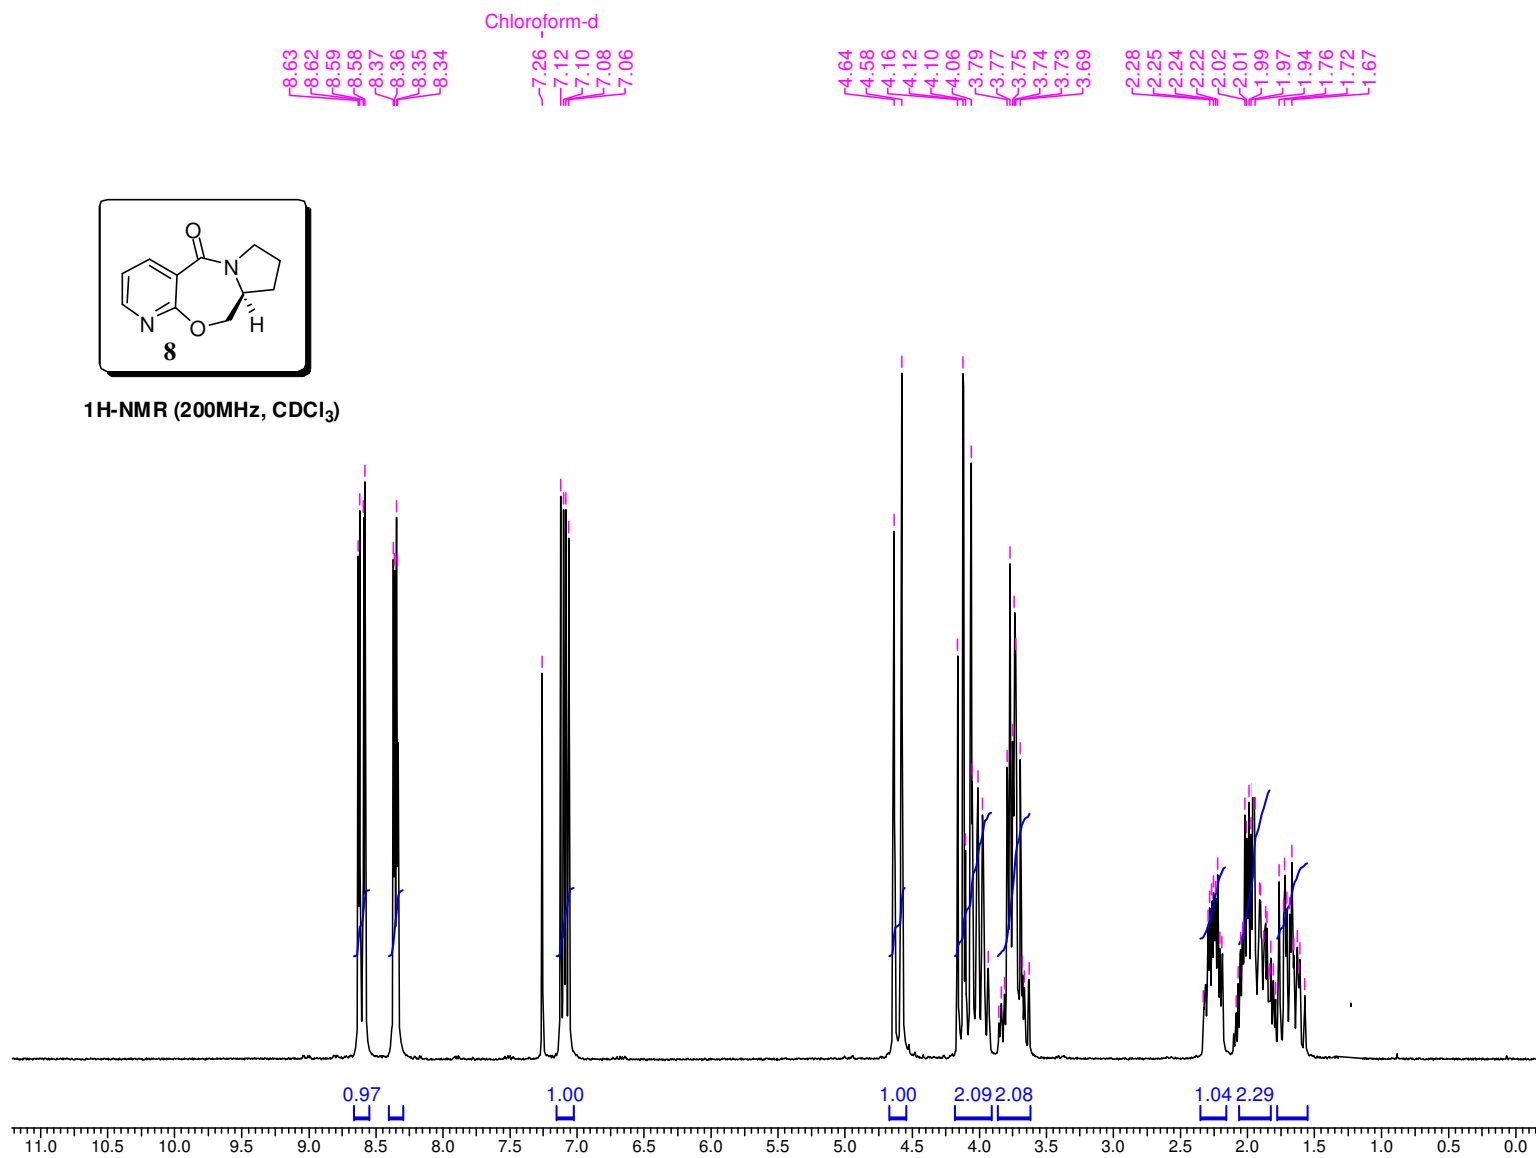



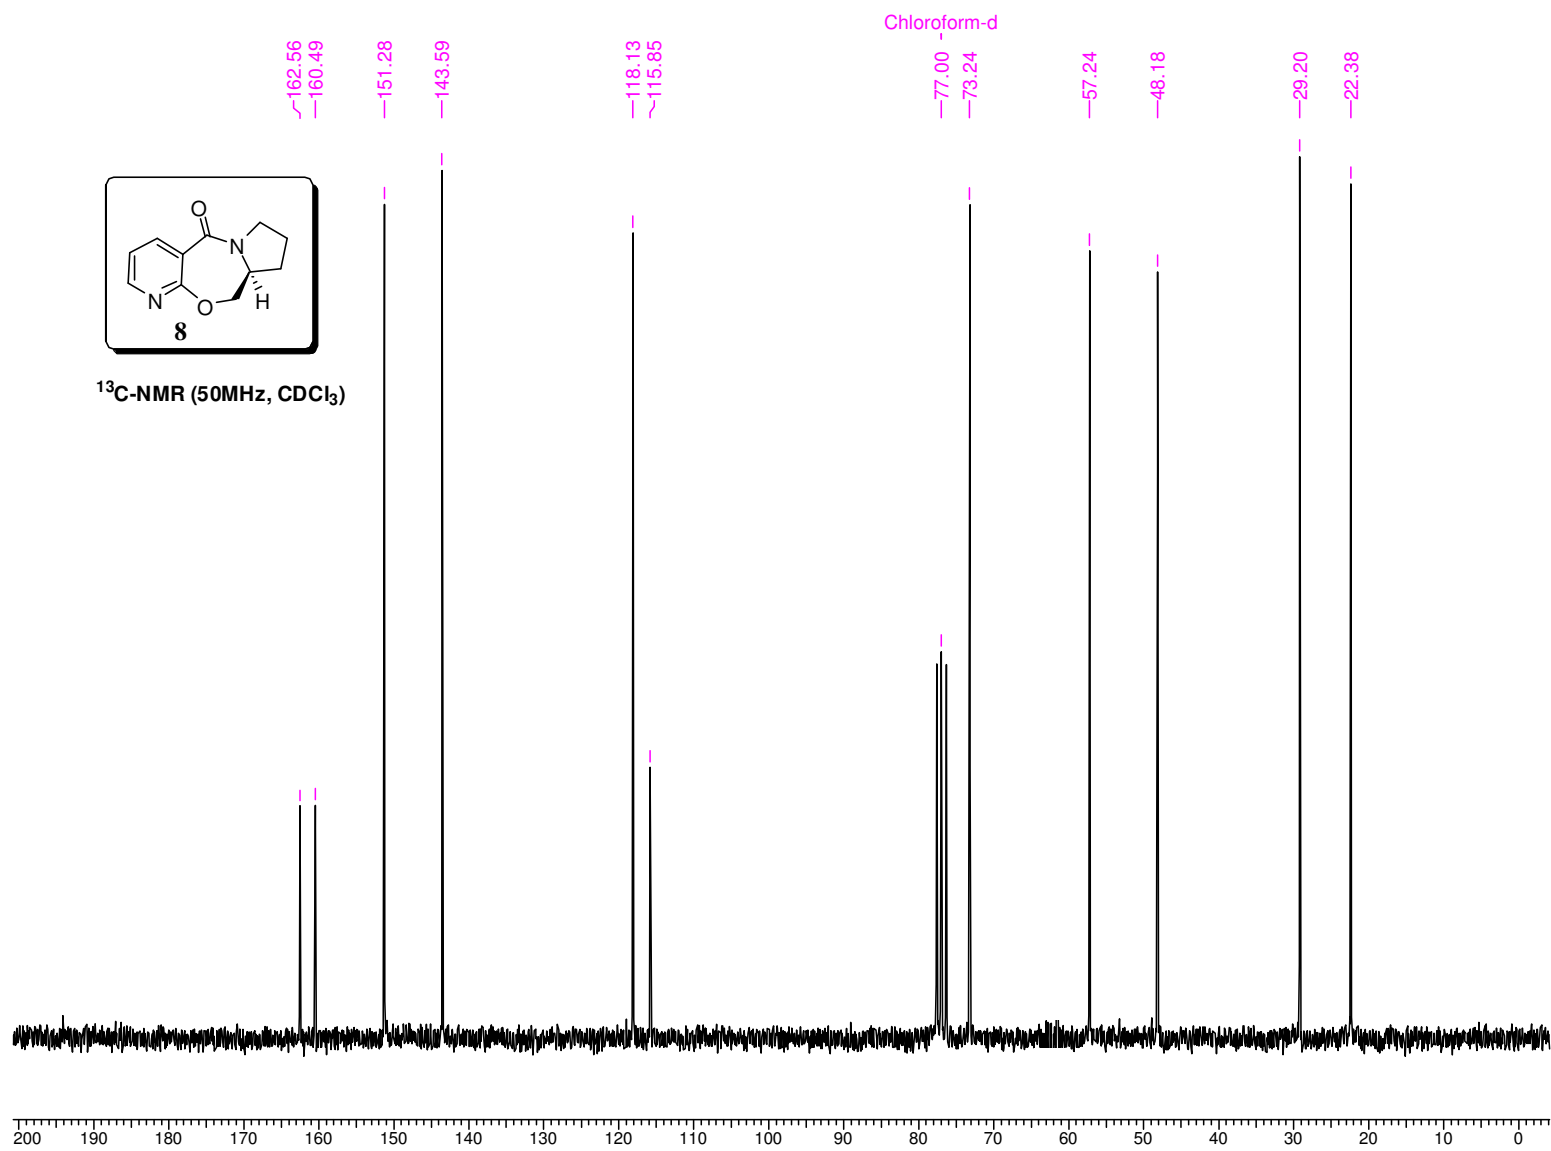

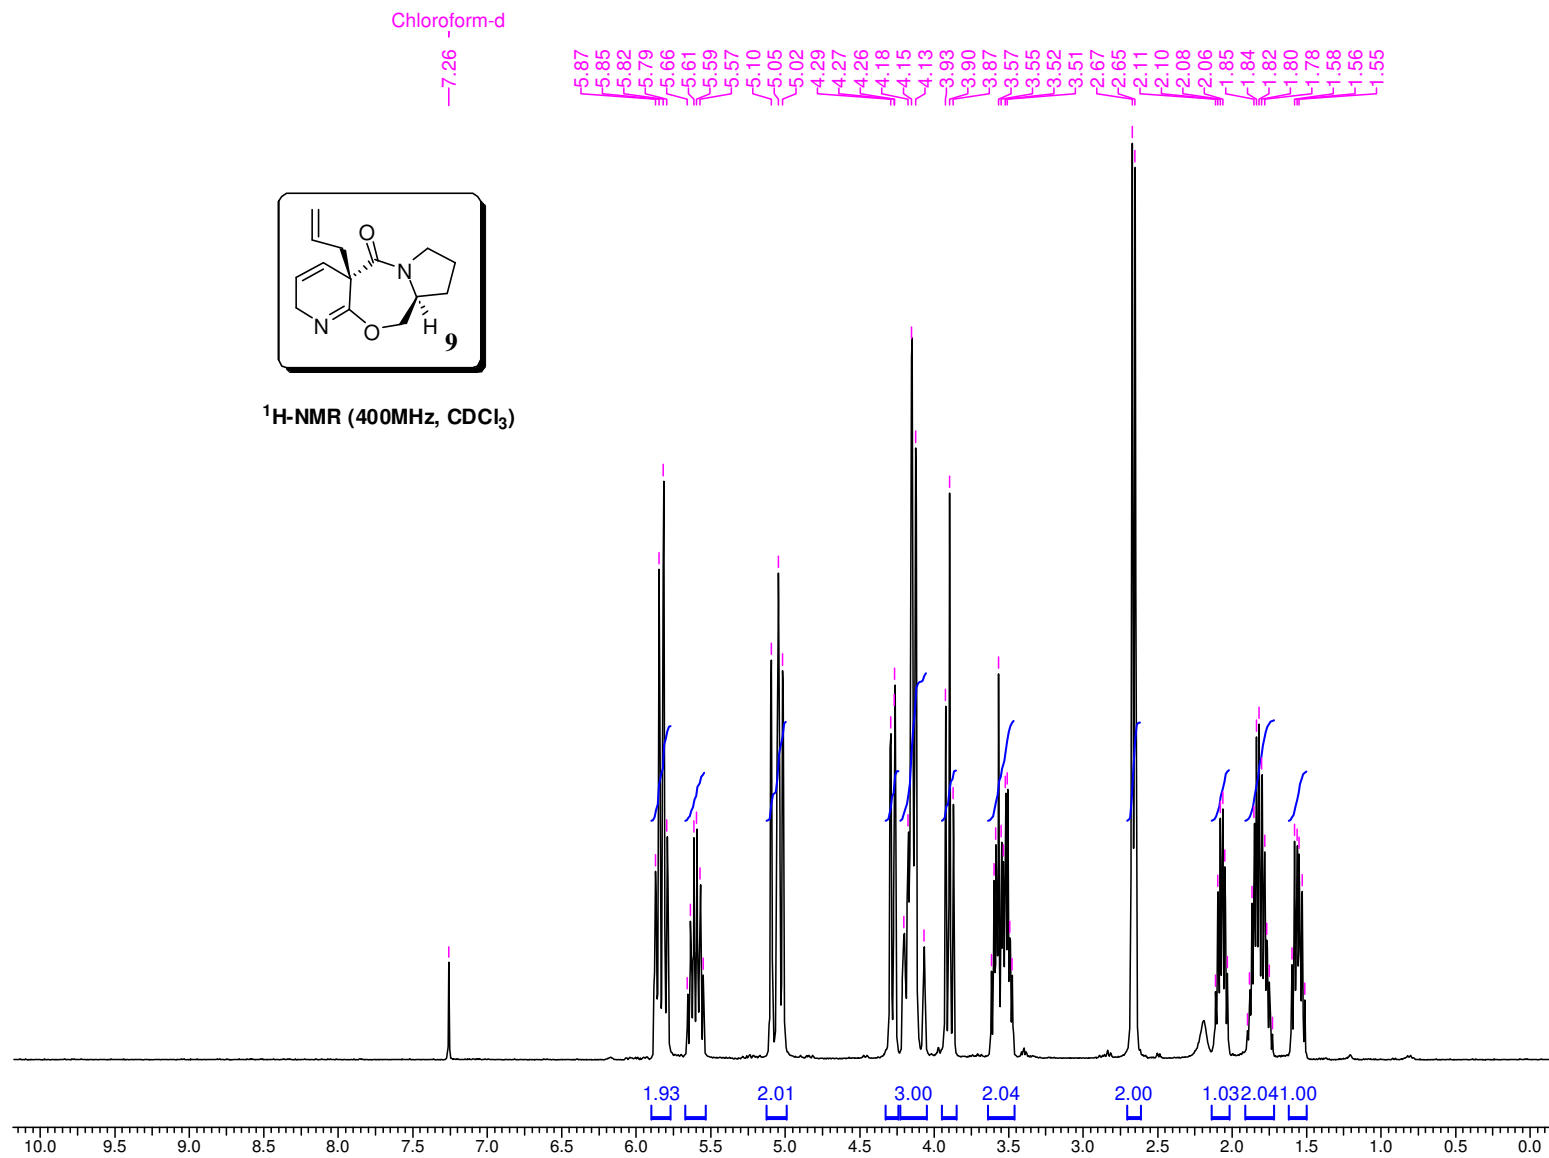

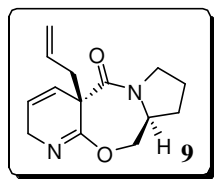

$^{13}\text{C}$ -NMR (100MHz,  $\text{CDCl}_3$ )

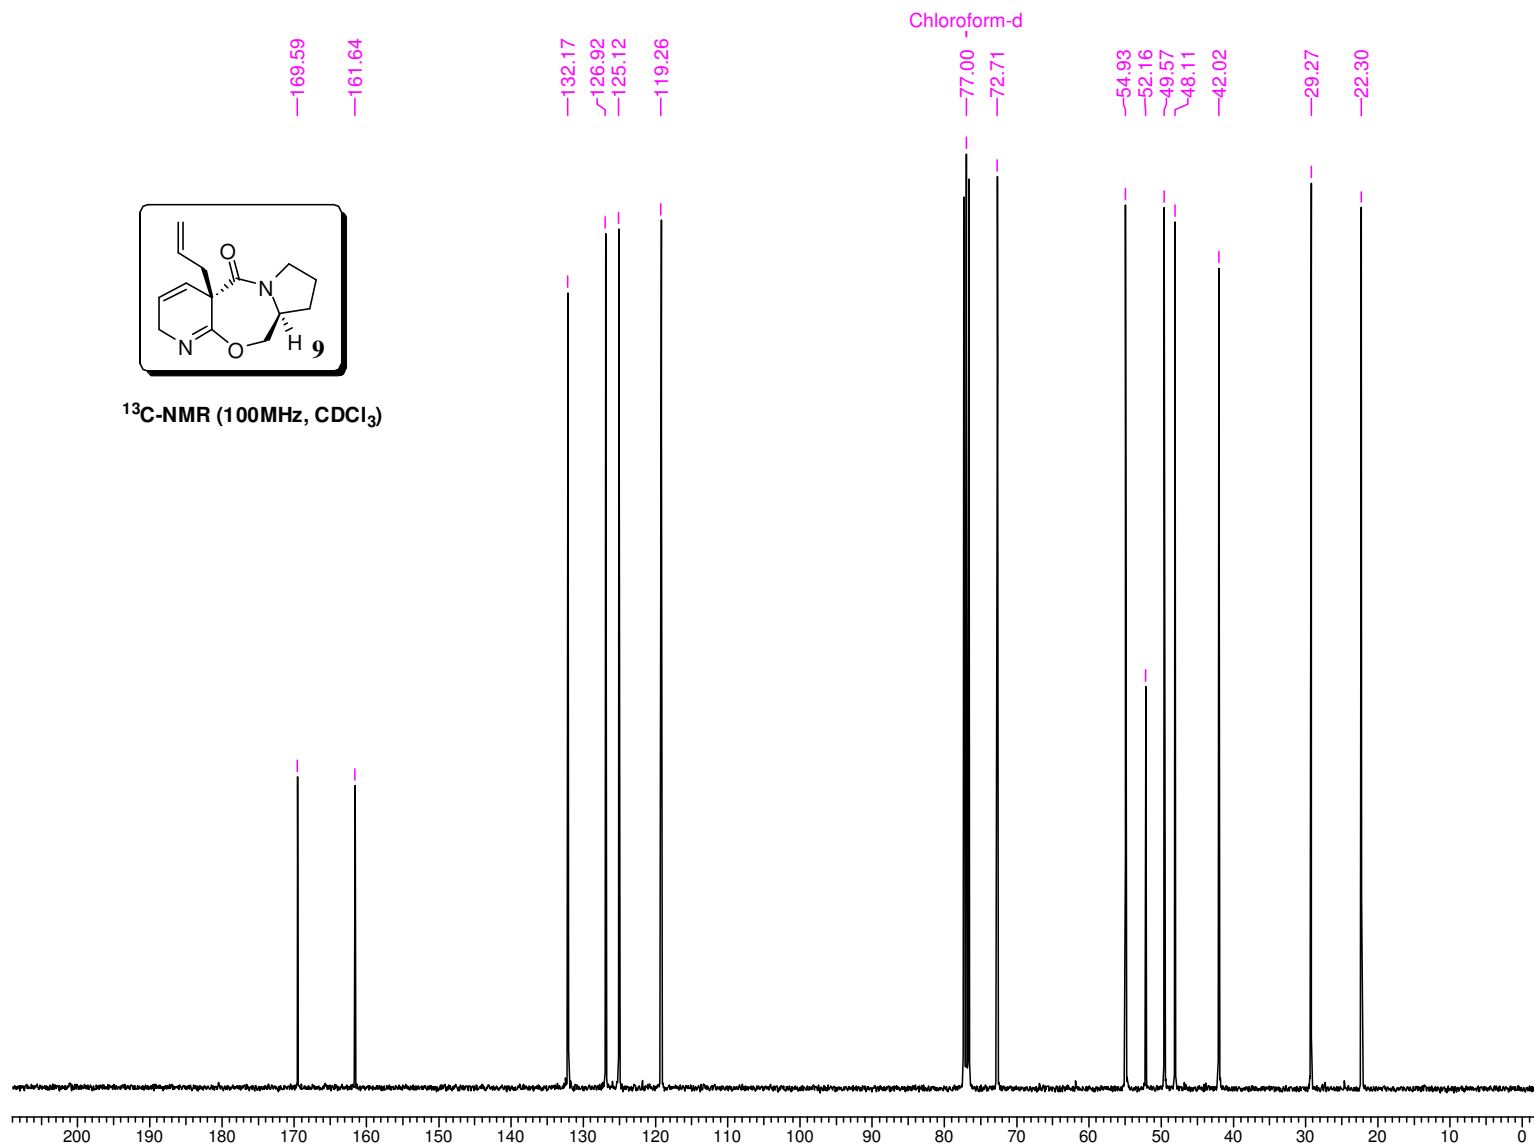

(4aS, 9aS)- 4a-Allyl-4a, 7, 8, 9a, 10-hexahydropyrido[3, 2-f] pyrrolo[2,1-c][1, 4] oxazepin-5(2H)-one: (9)

Chrom Type: HPLC Channel : 1

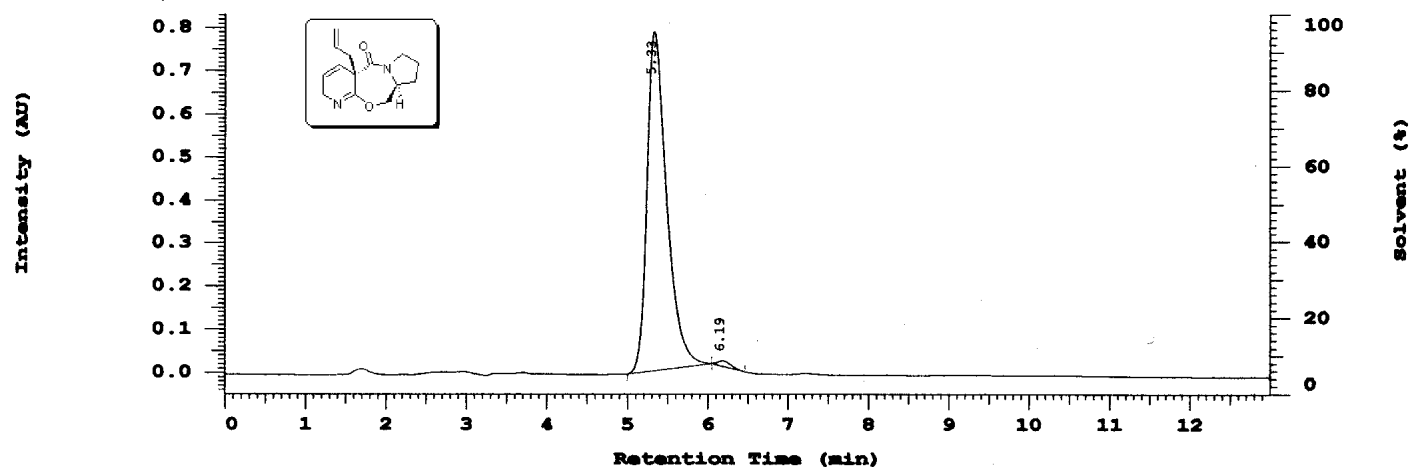

| No. | RT   | Height | Area    | Area %  |
|-----|------|--------|---------|---------|
| 1   | 5.33 | 392937 | 6709760 | 98.938  |
| 2   | 6.19 | 6155   | 72044   | 1.062   |
|     |      | 399092 | 6781804 | 100.000 |

HPLC conditions:

|              |                                |
|--------------|--------------------------------|
| Column       | : Atlantis RP-18(250×4.6mm)    |
| Mobile Phase | : Acetonitrile : Water (40:60) |
| Wavelength   | : 224nm                        |
| Flow rate    | : 1.0 mL/min (1200psi)         |
| Sample conc  | : 2mg/1mL (Inj Vol-5µl)        |

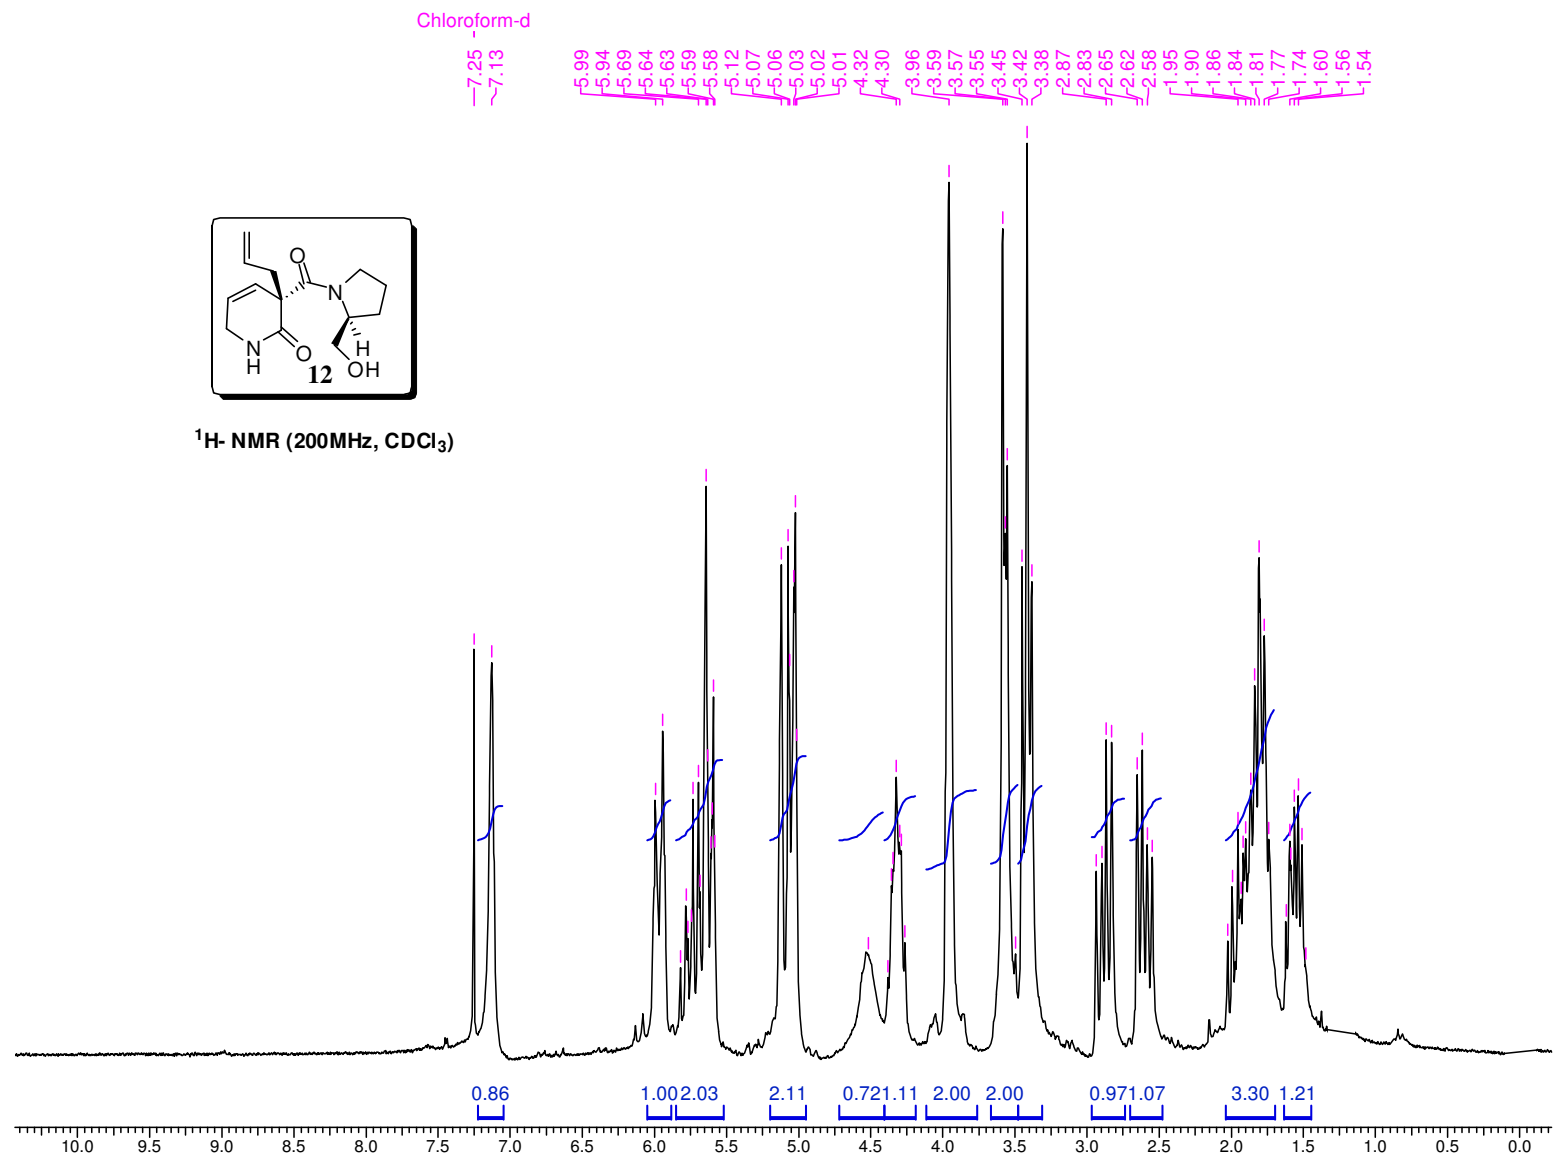

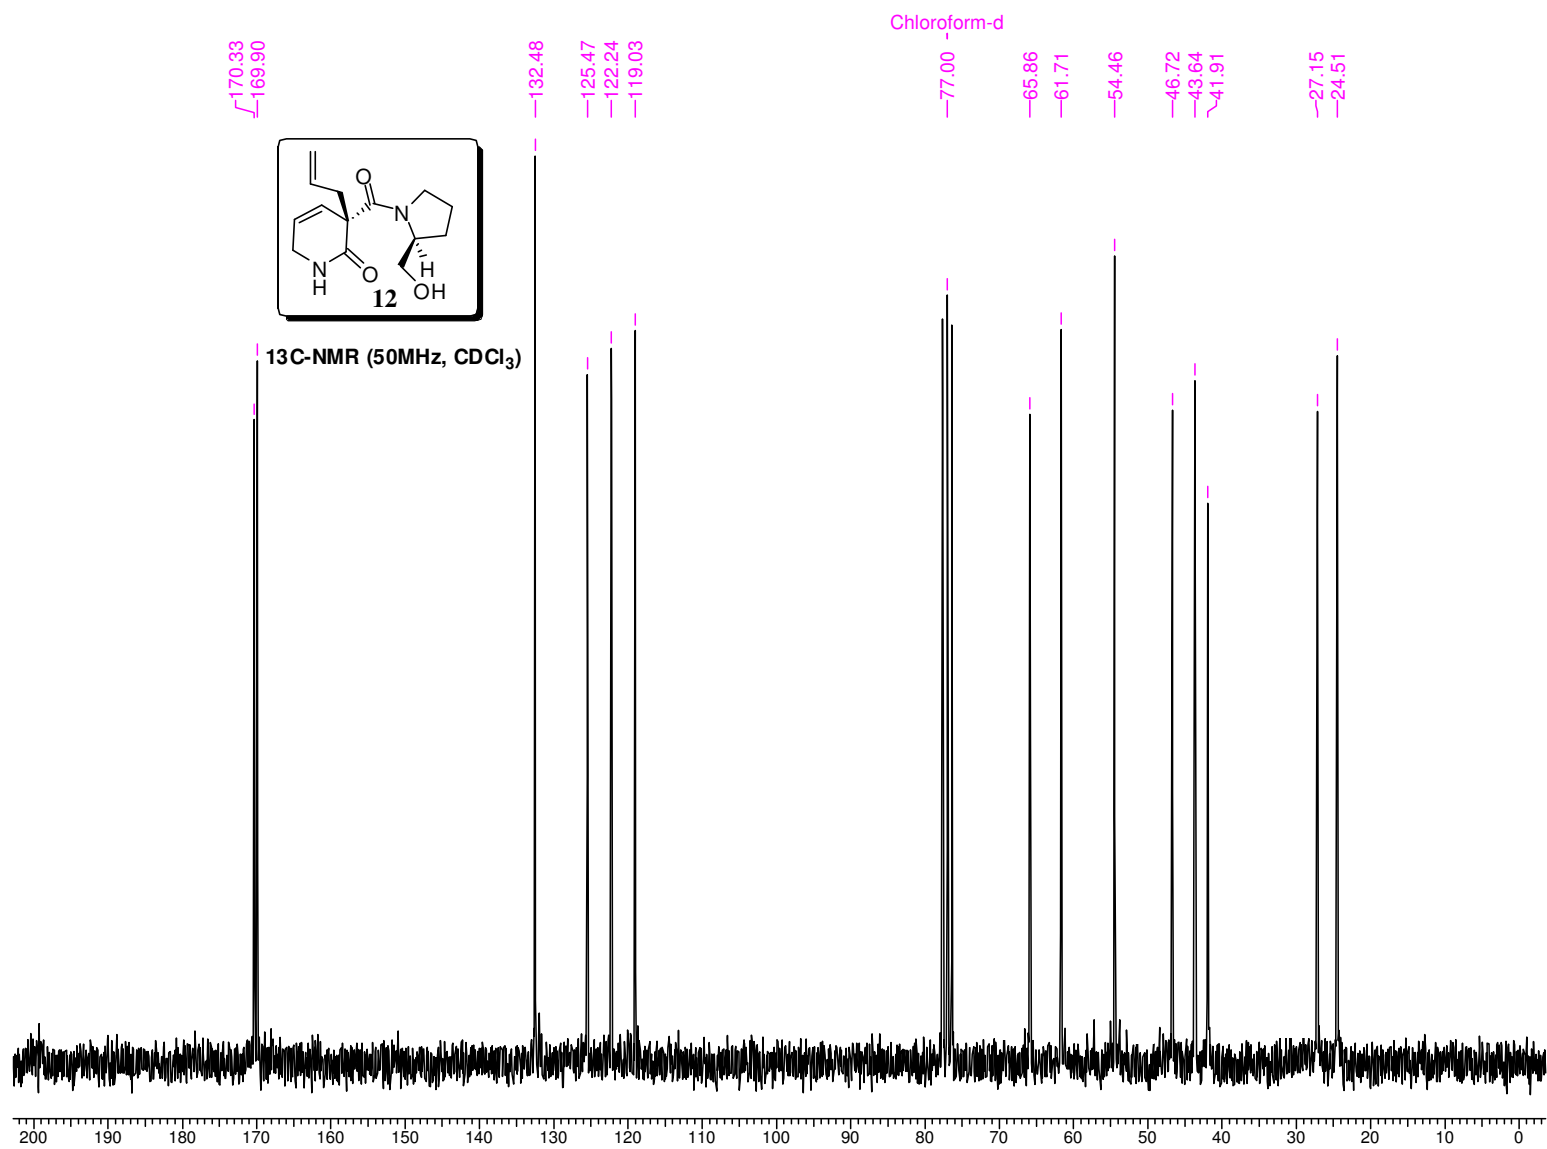

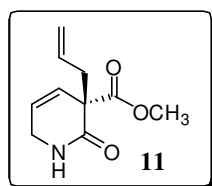

**<sup>1</sup>H-NMR (200MHz, CDCl<sub>3</sub>)**

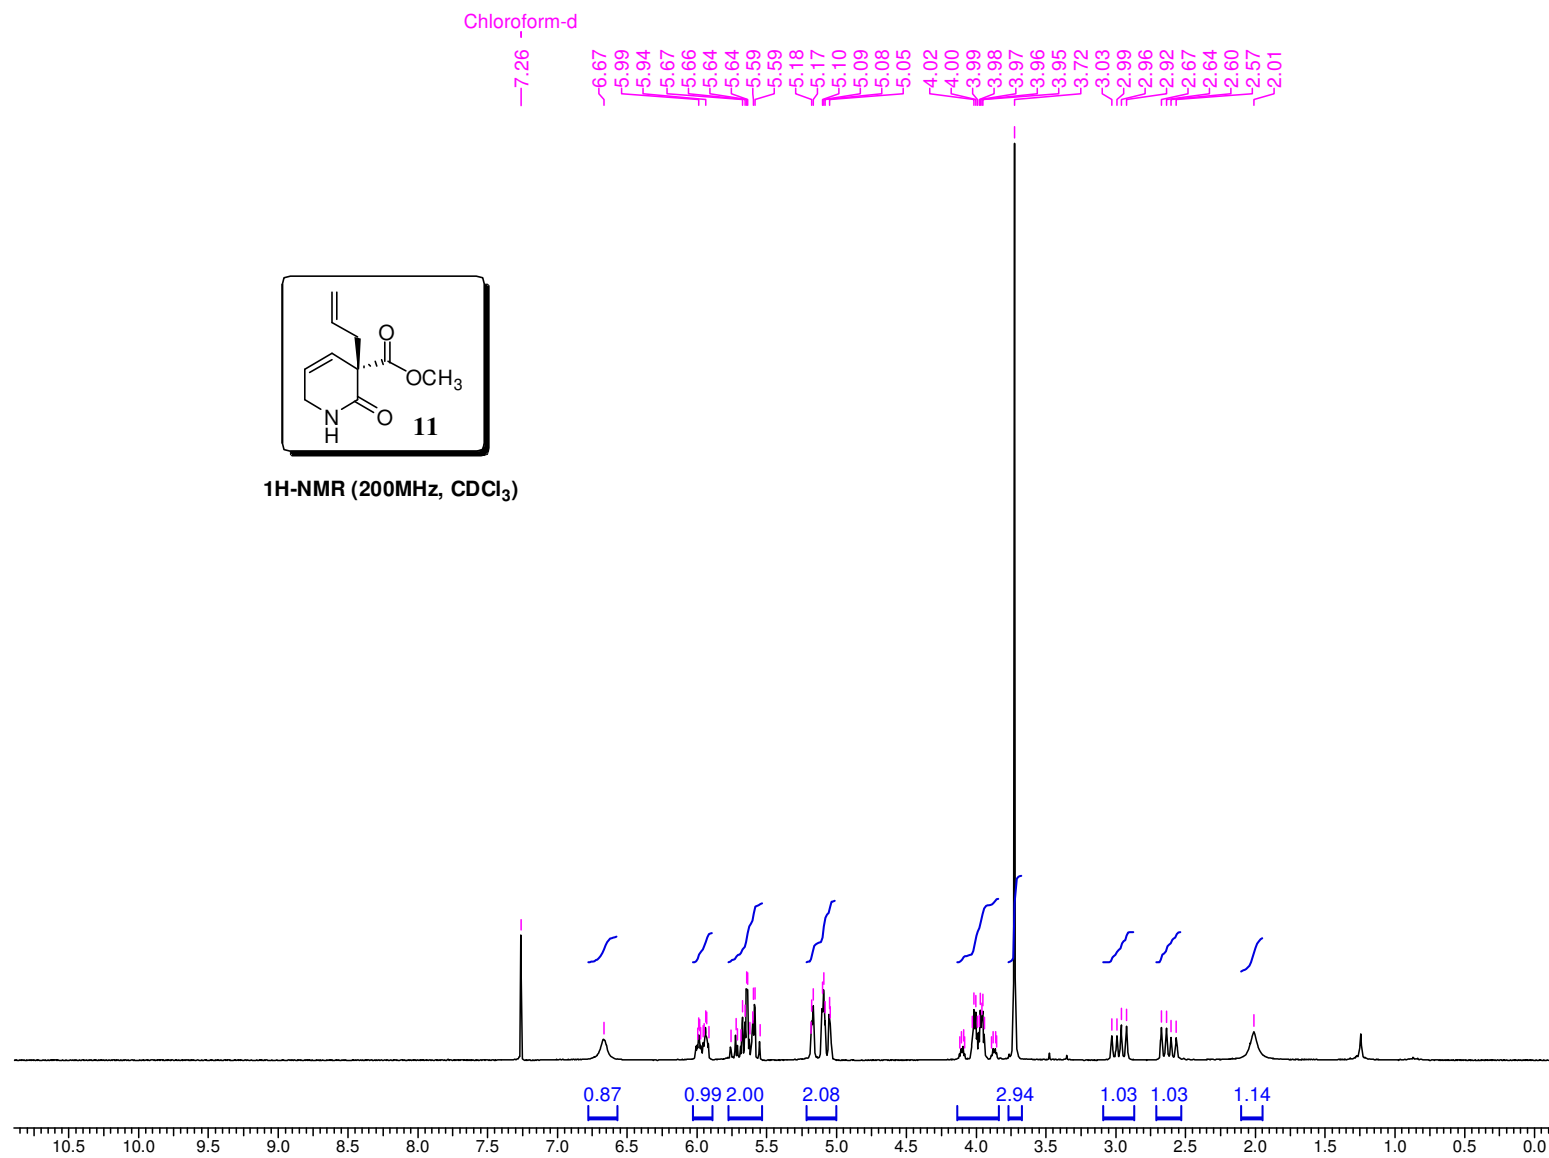

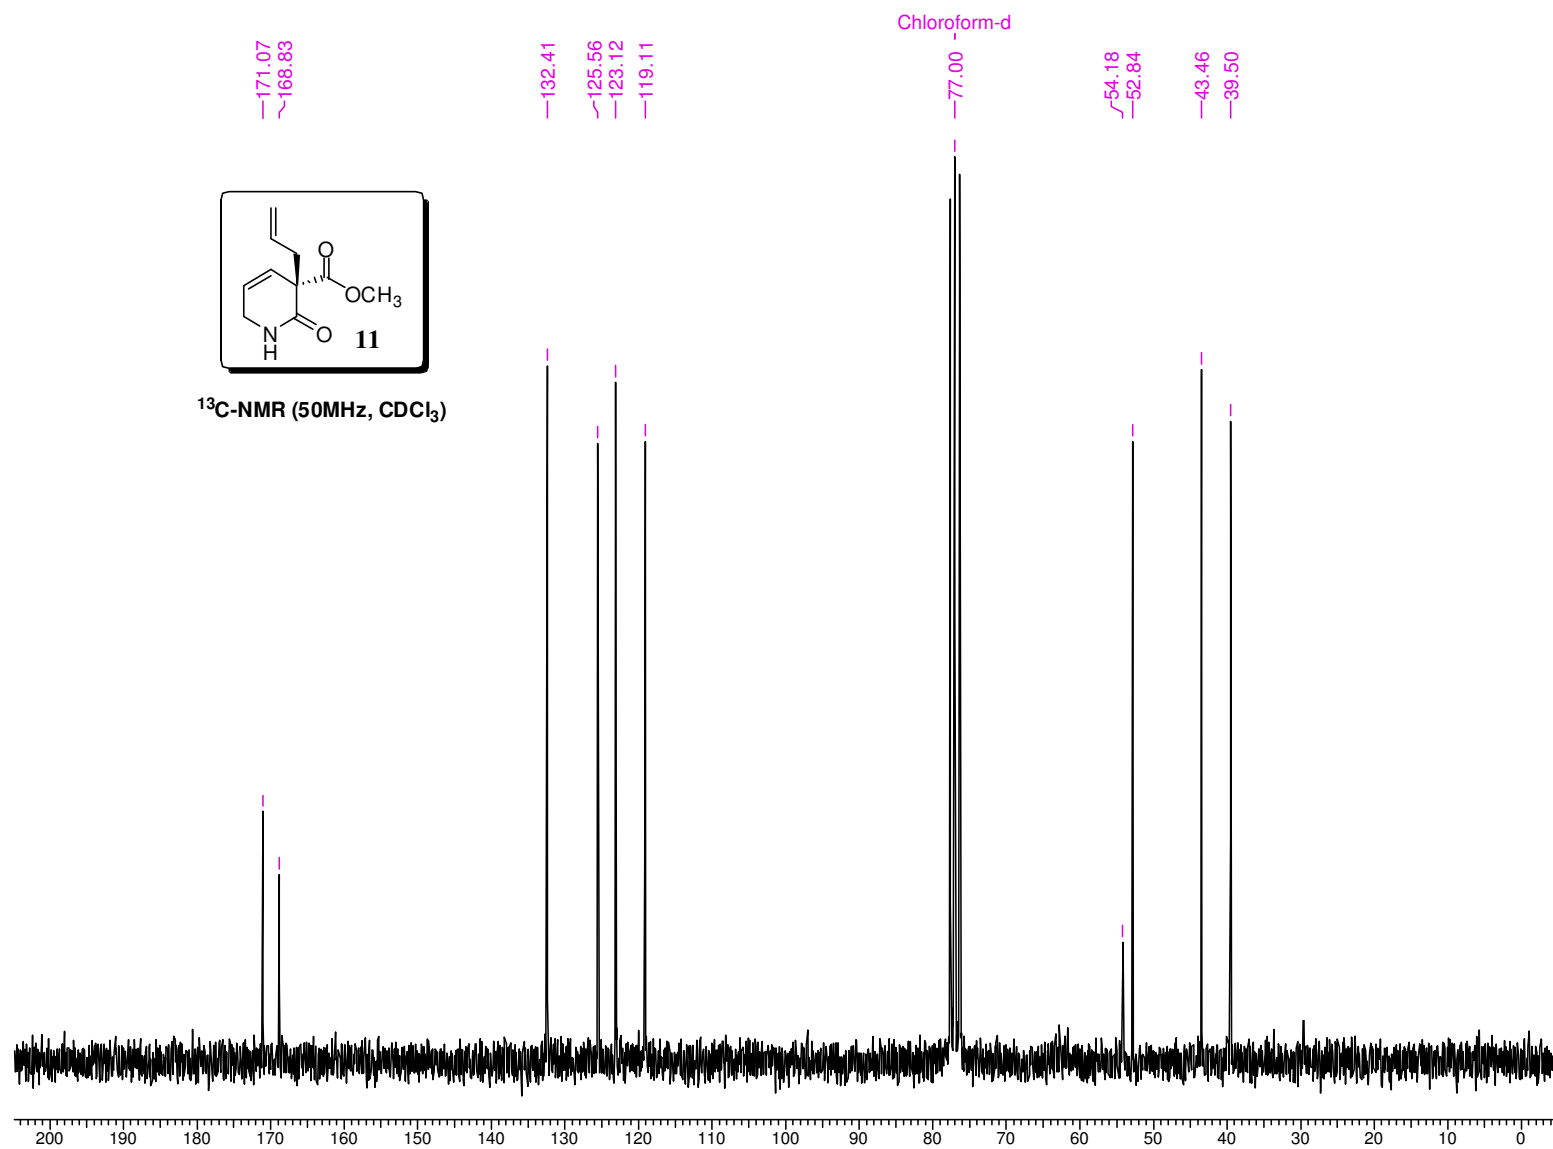



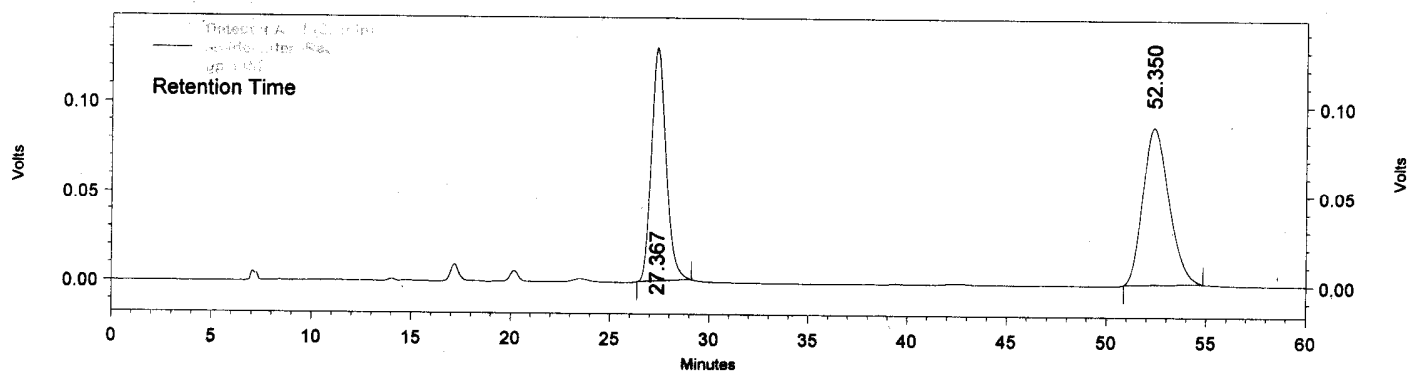

Detector A - 1  
(220nm)

| Peak # | Retention Time | Area     | Area %  | Height | Height Percent |
|--------|----------------|----------|---------|--------|----------------|
| 1      | 27.367         | 6676591  | 45.529  | 130267 | 59.72          |
| 2      | 52.350         | 7987913  | 54.471  | 87868  | 40.28          |
| Totals |                | 14664504 | 100.000 | 218135 | 100.00         |

Column :-Chiralcel OD- H(250x4.6mm)  
M.P. :IPA:P.E.(10:90)  
Wavelength :- 220 nm  
Flow :- 0.5ml/min(265psi)  
conc. :- 2mg/2 ml  
Injection vol : Inj Vol- 5ul

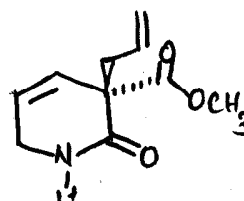

(S)-Ester (11) (19% ee)

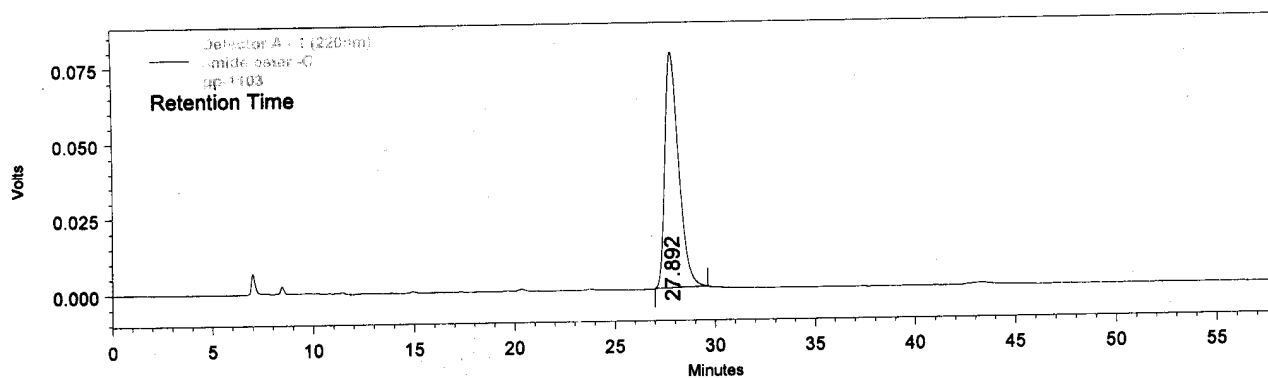

Detector A - 1  
(220nm)

| Pk #   | Retention Time | Area    | Area %  | Height | Heig |
|--------|----------------|---------|---------|--------|------|
| 1      | 27.892         | 3708490 | 100.000 | 78021  |      |
| Totals |                | 3708490 | 100.000 | 78021  |      |

Column :-Chiralcel OD- H(250x4.6mm)  
M.P. :IPA:P.E.(10:90)  
Wavelength :- 220 nm  
Flow :- 0.5ml/min(265psi)  
conc. :- 2mg/2 ml  
Injection vol : Inj Vol- 5ul

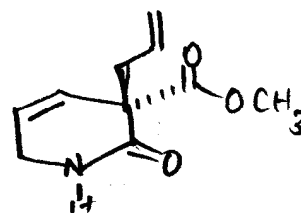

(S)-Ester (11) (>99% ee)

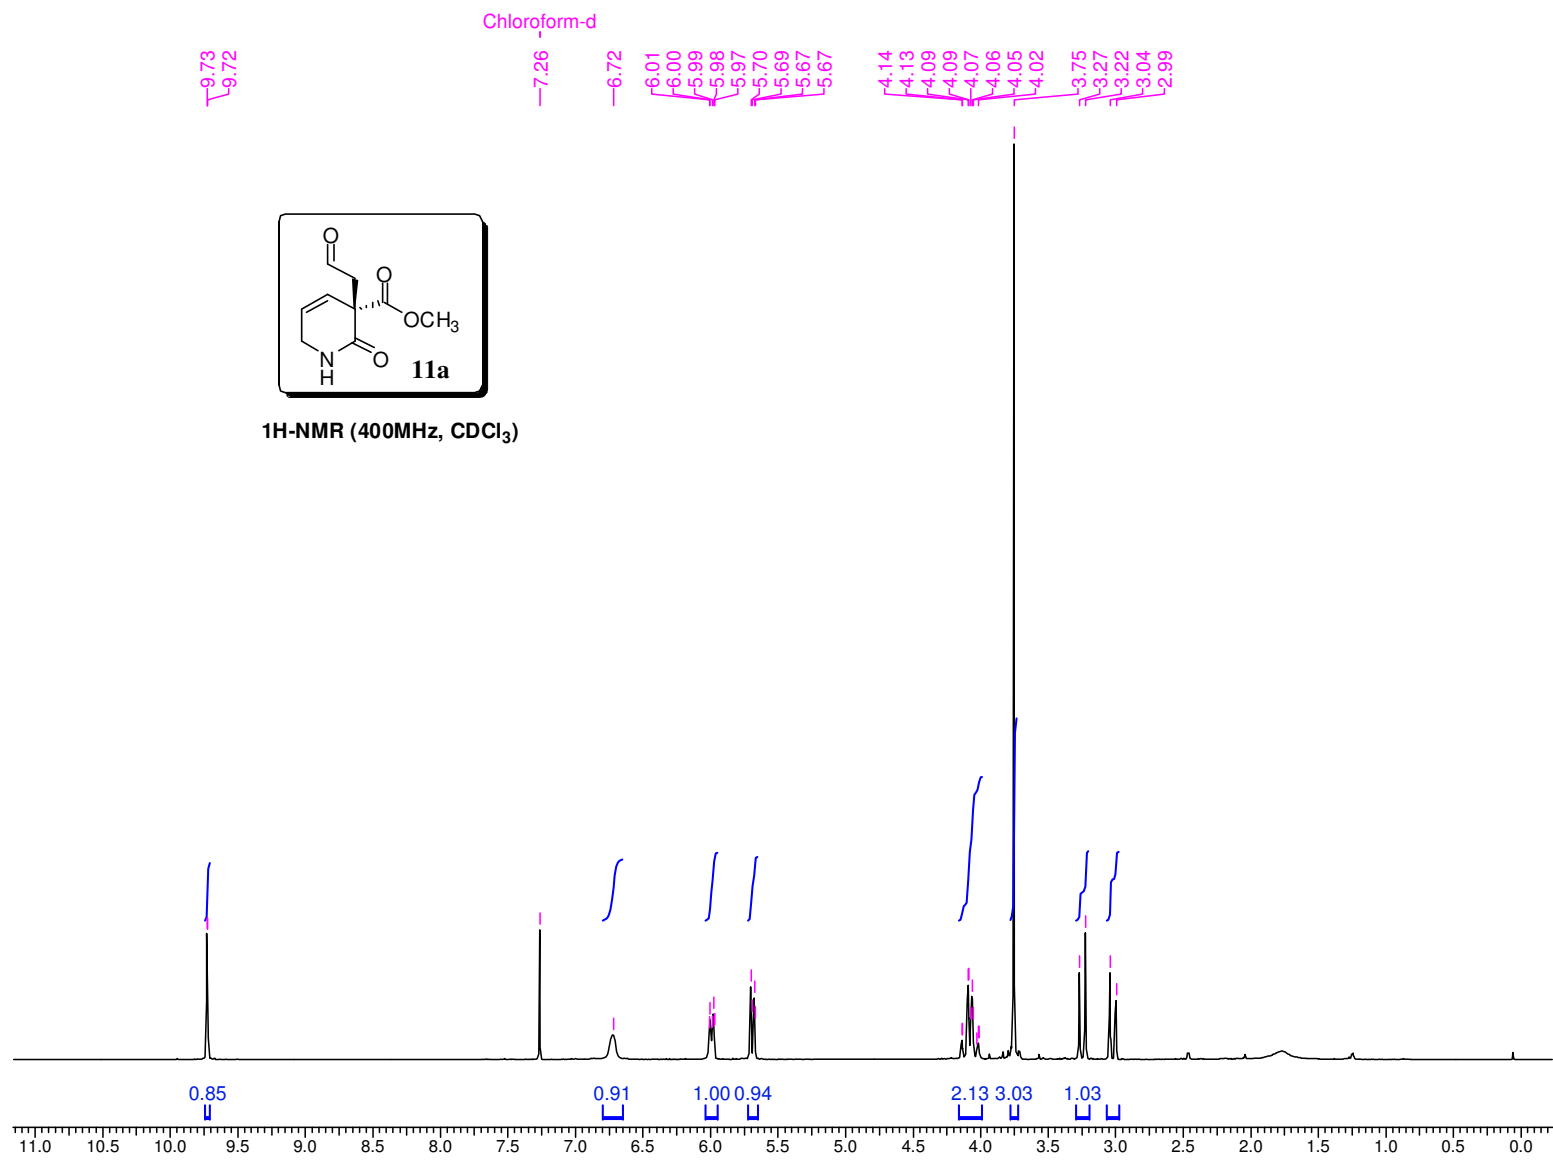

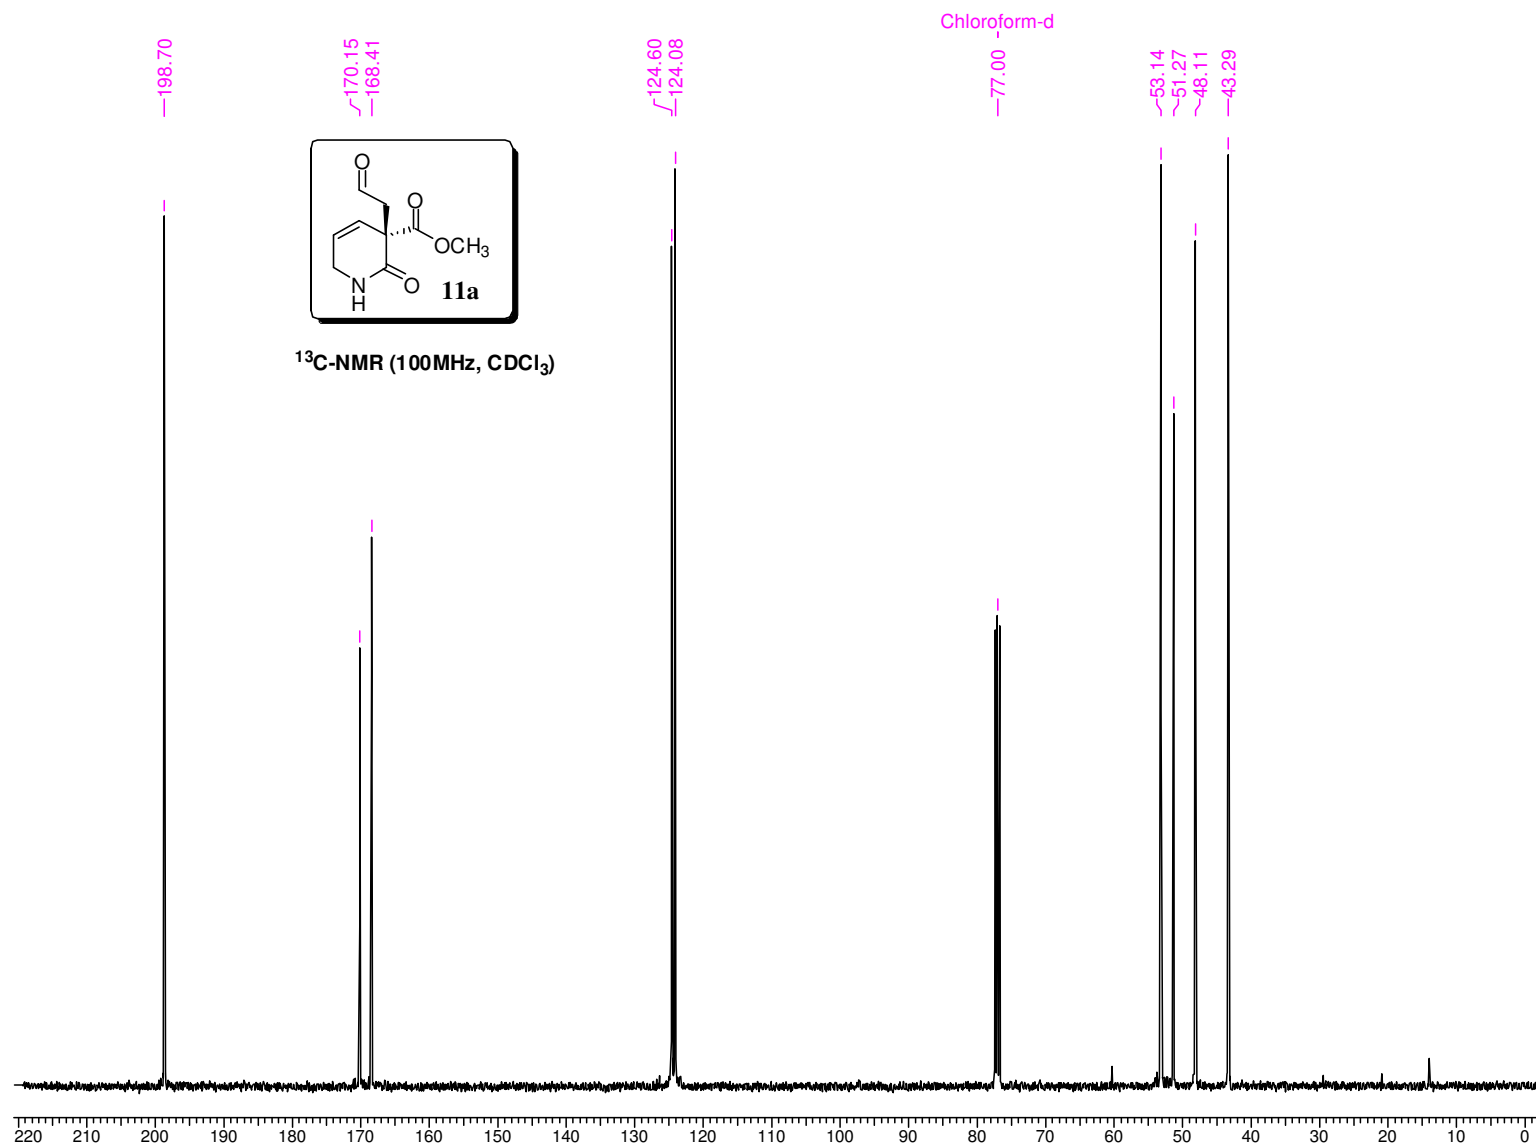

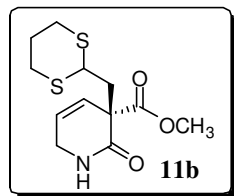

**$^1\text{H-NMR}$  (400MHz,  $\text{CDCl}_3$ )**

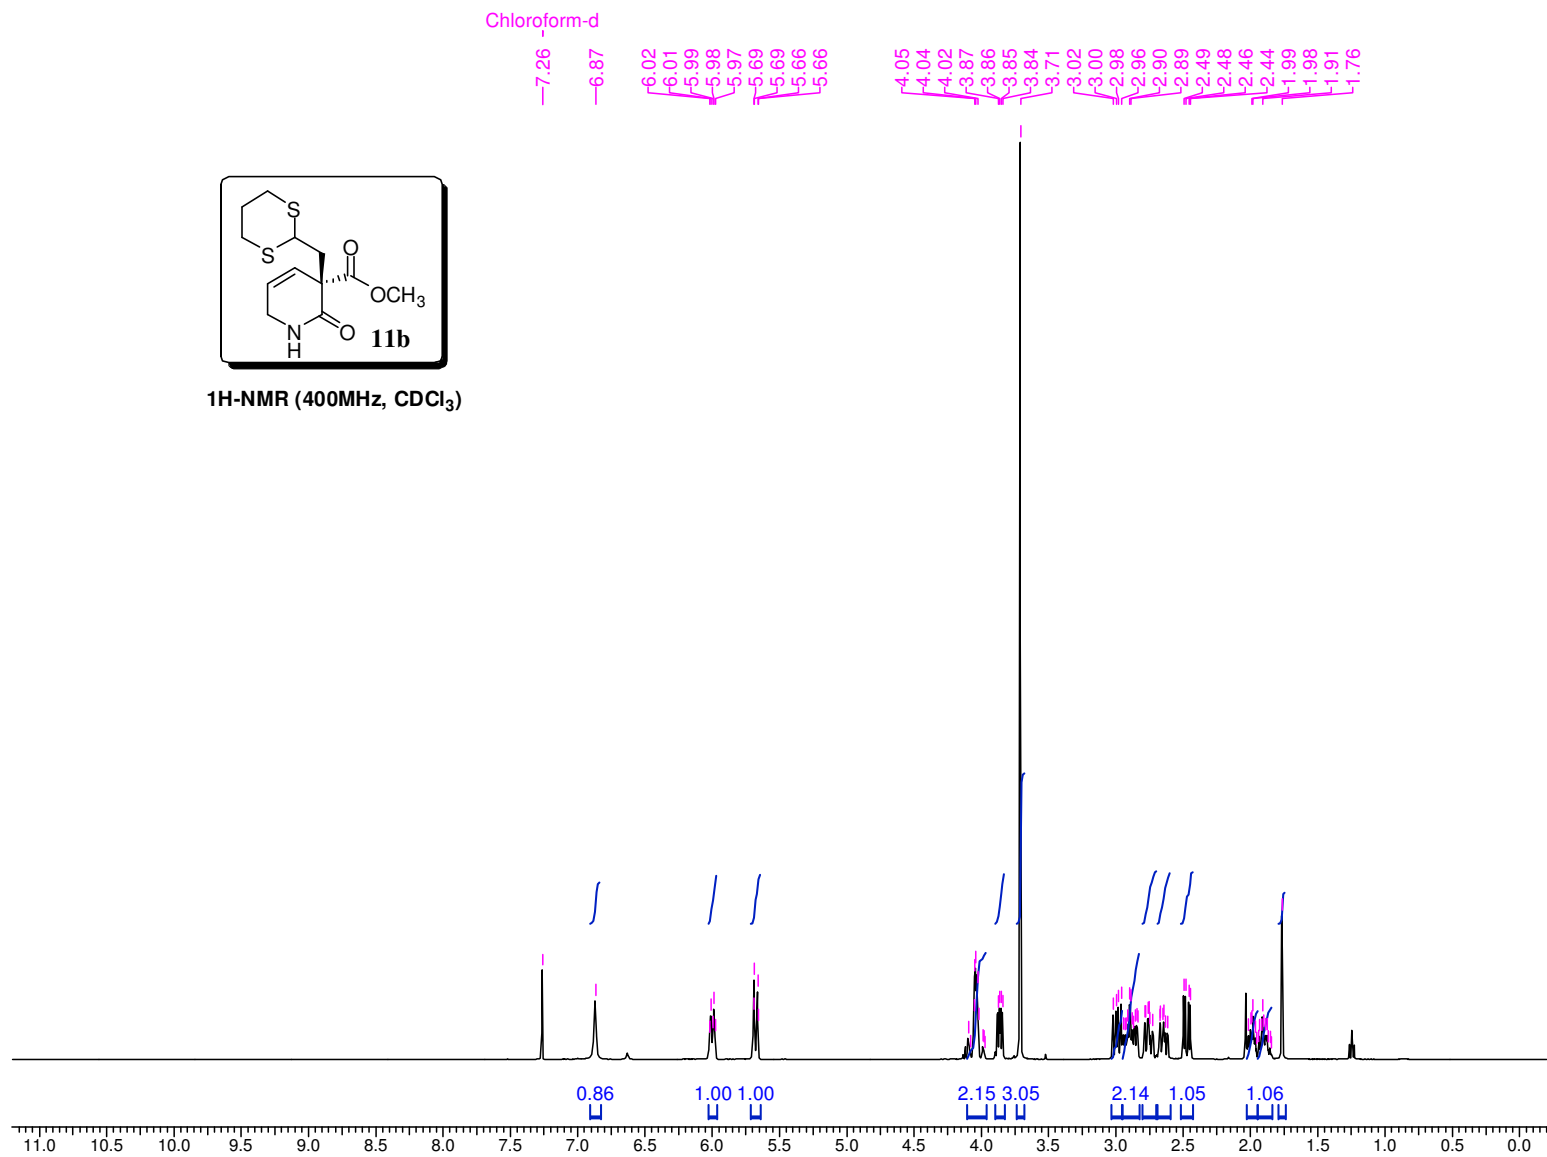

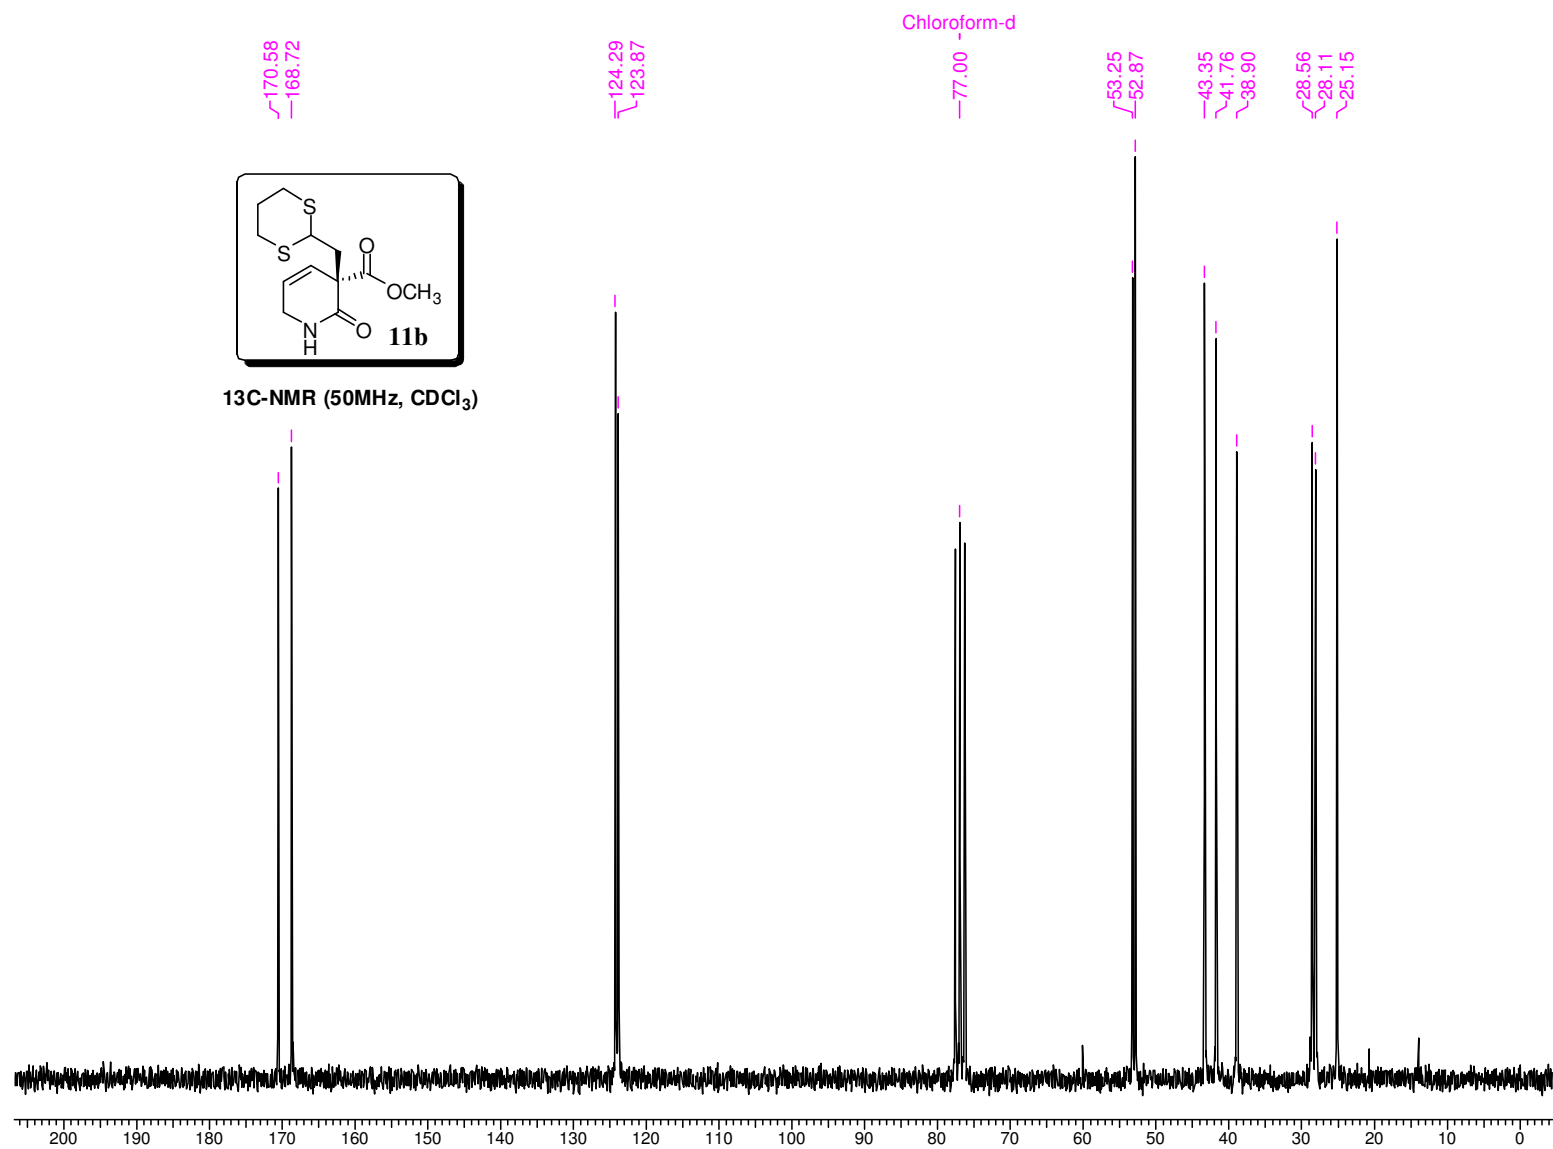

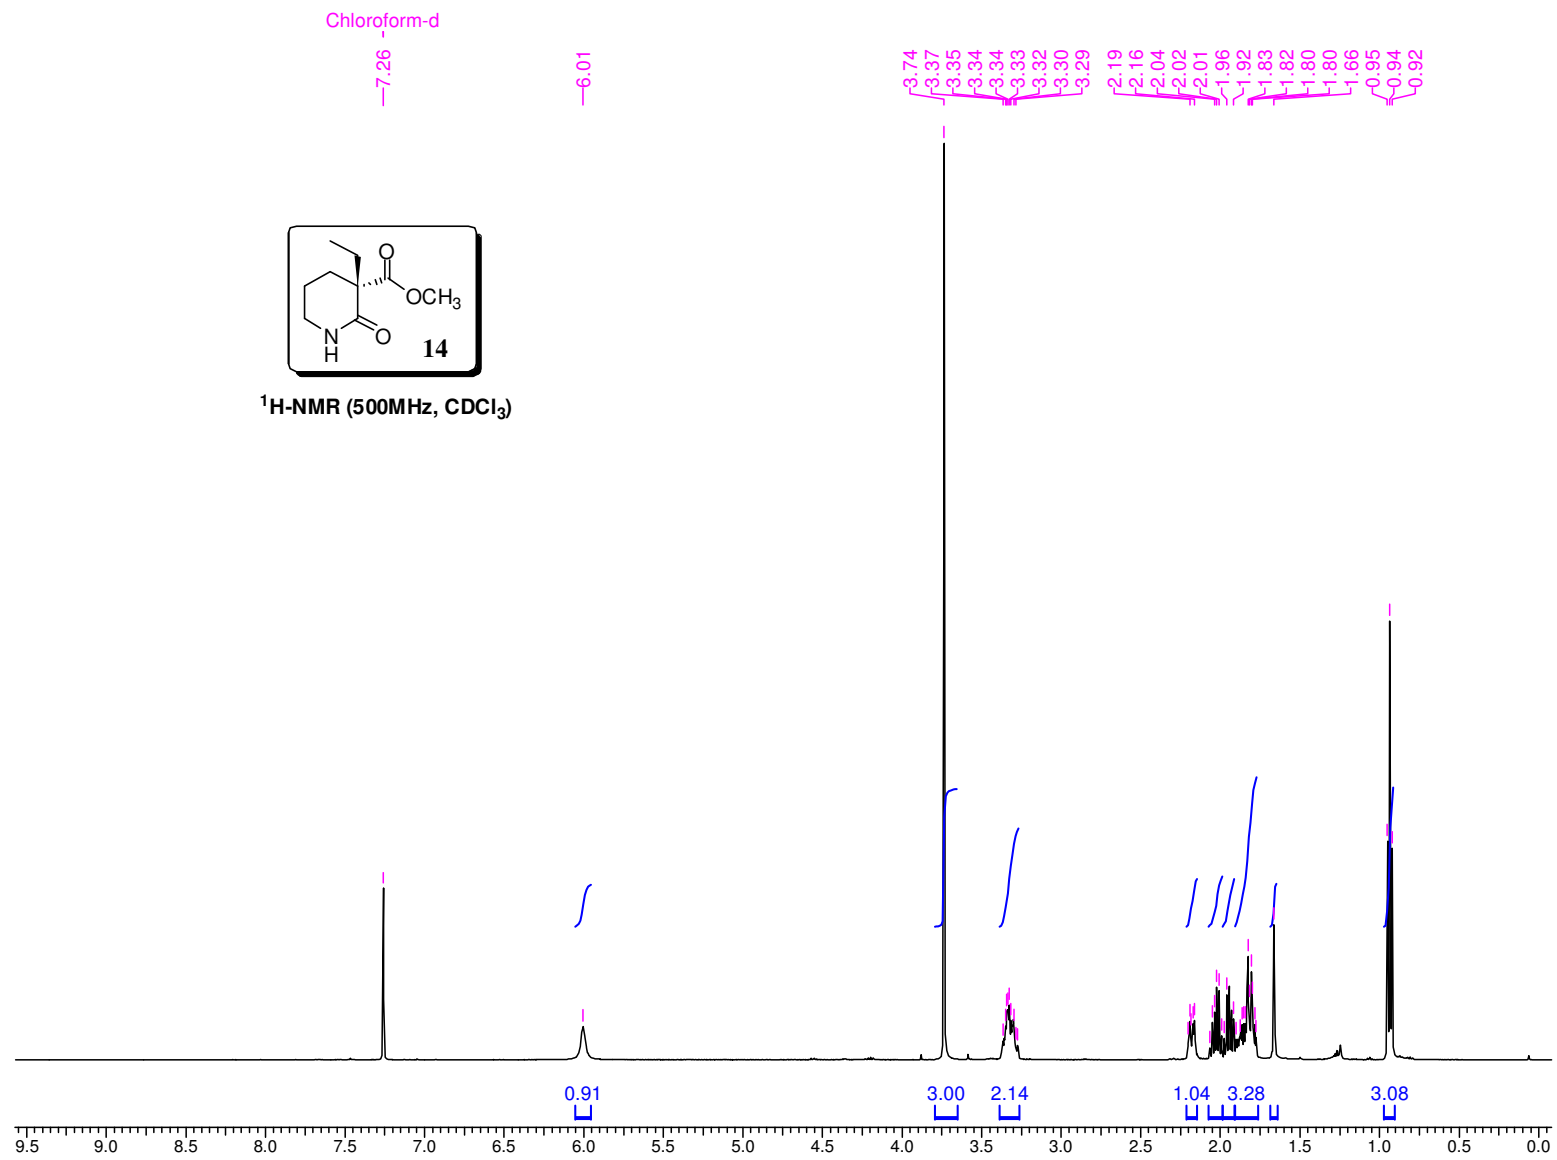

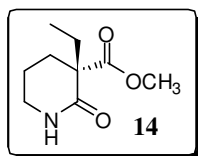

$^{13}\text{C}$ -NMR (50MHz,  $\text{CDCl}_3$ )

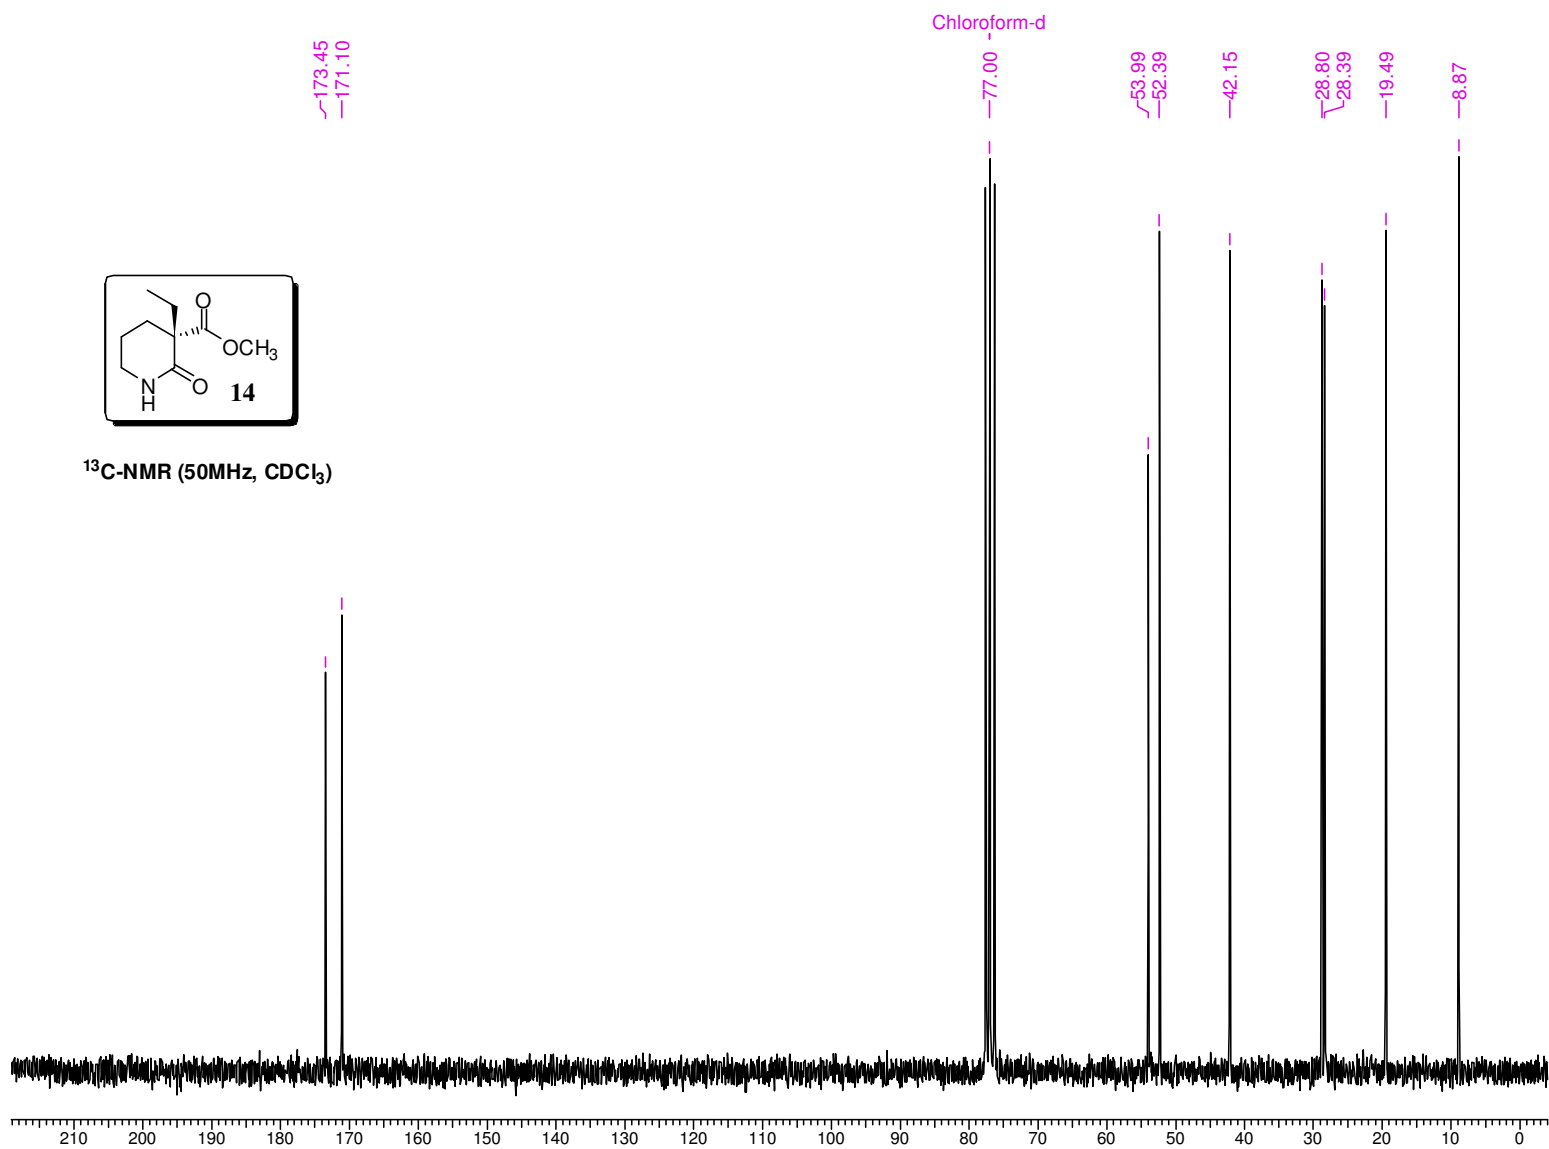



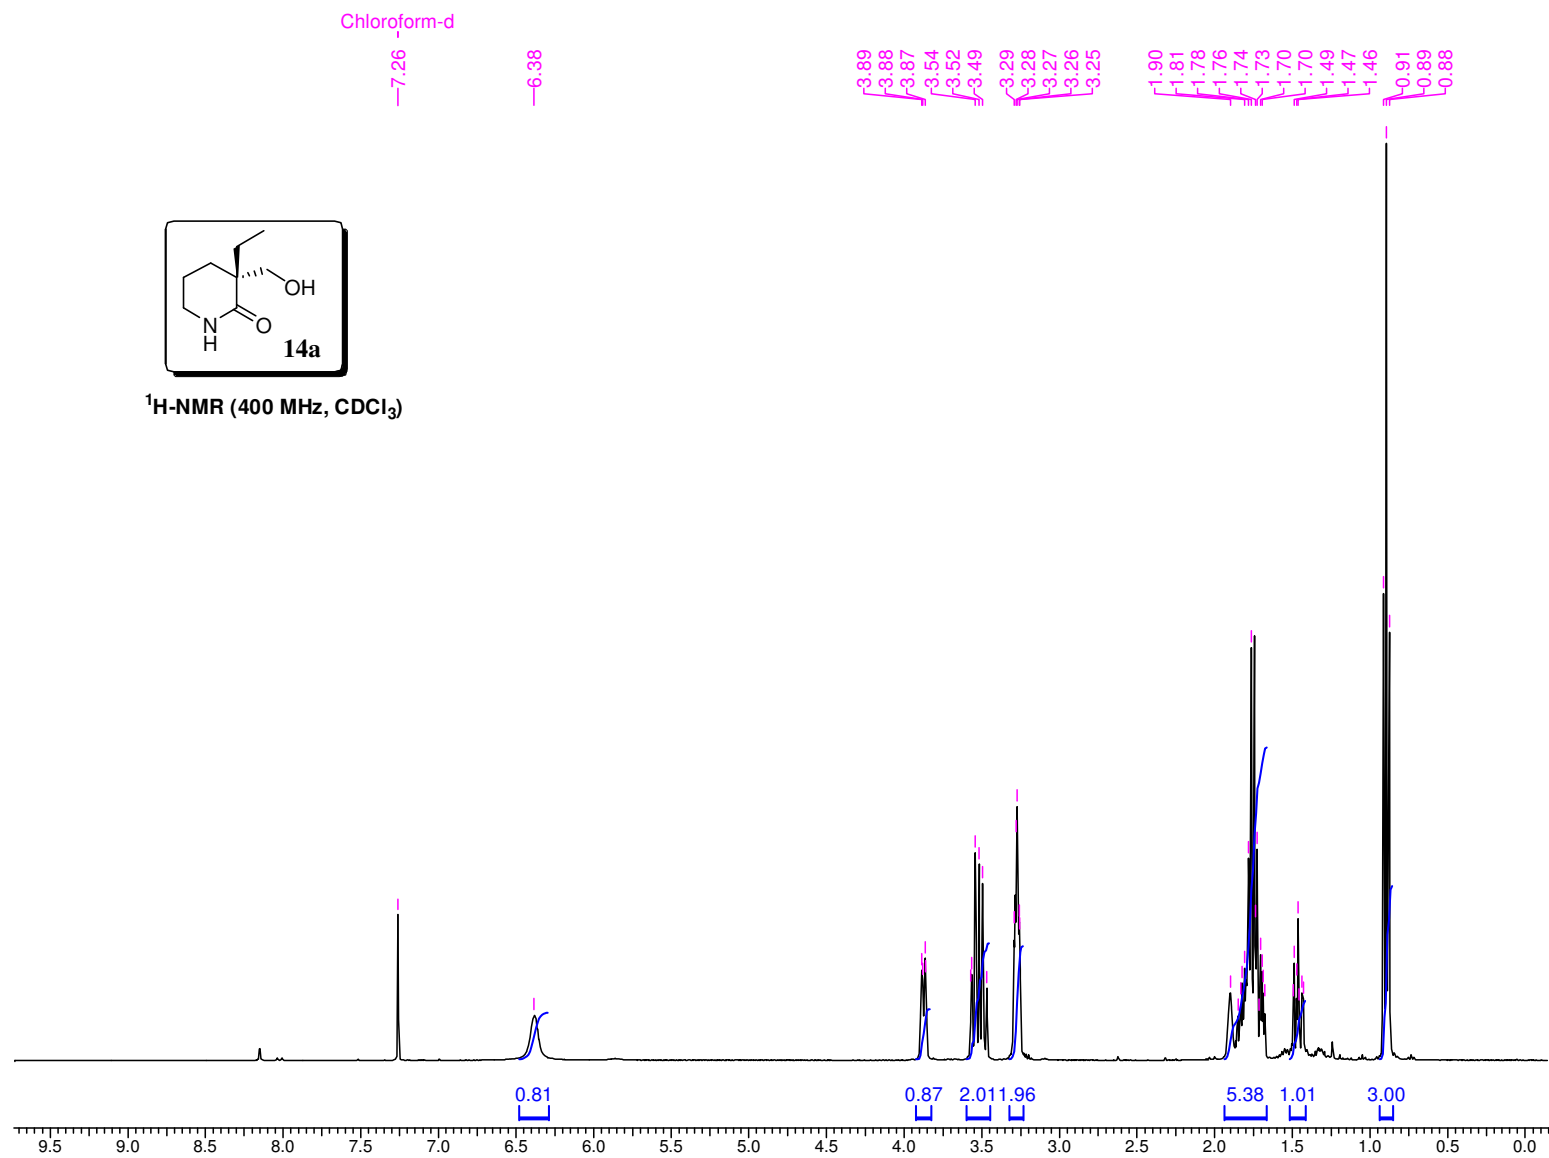

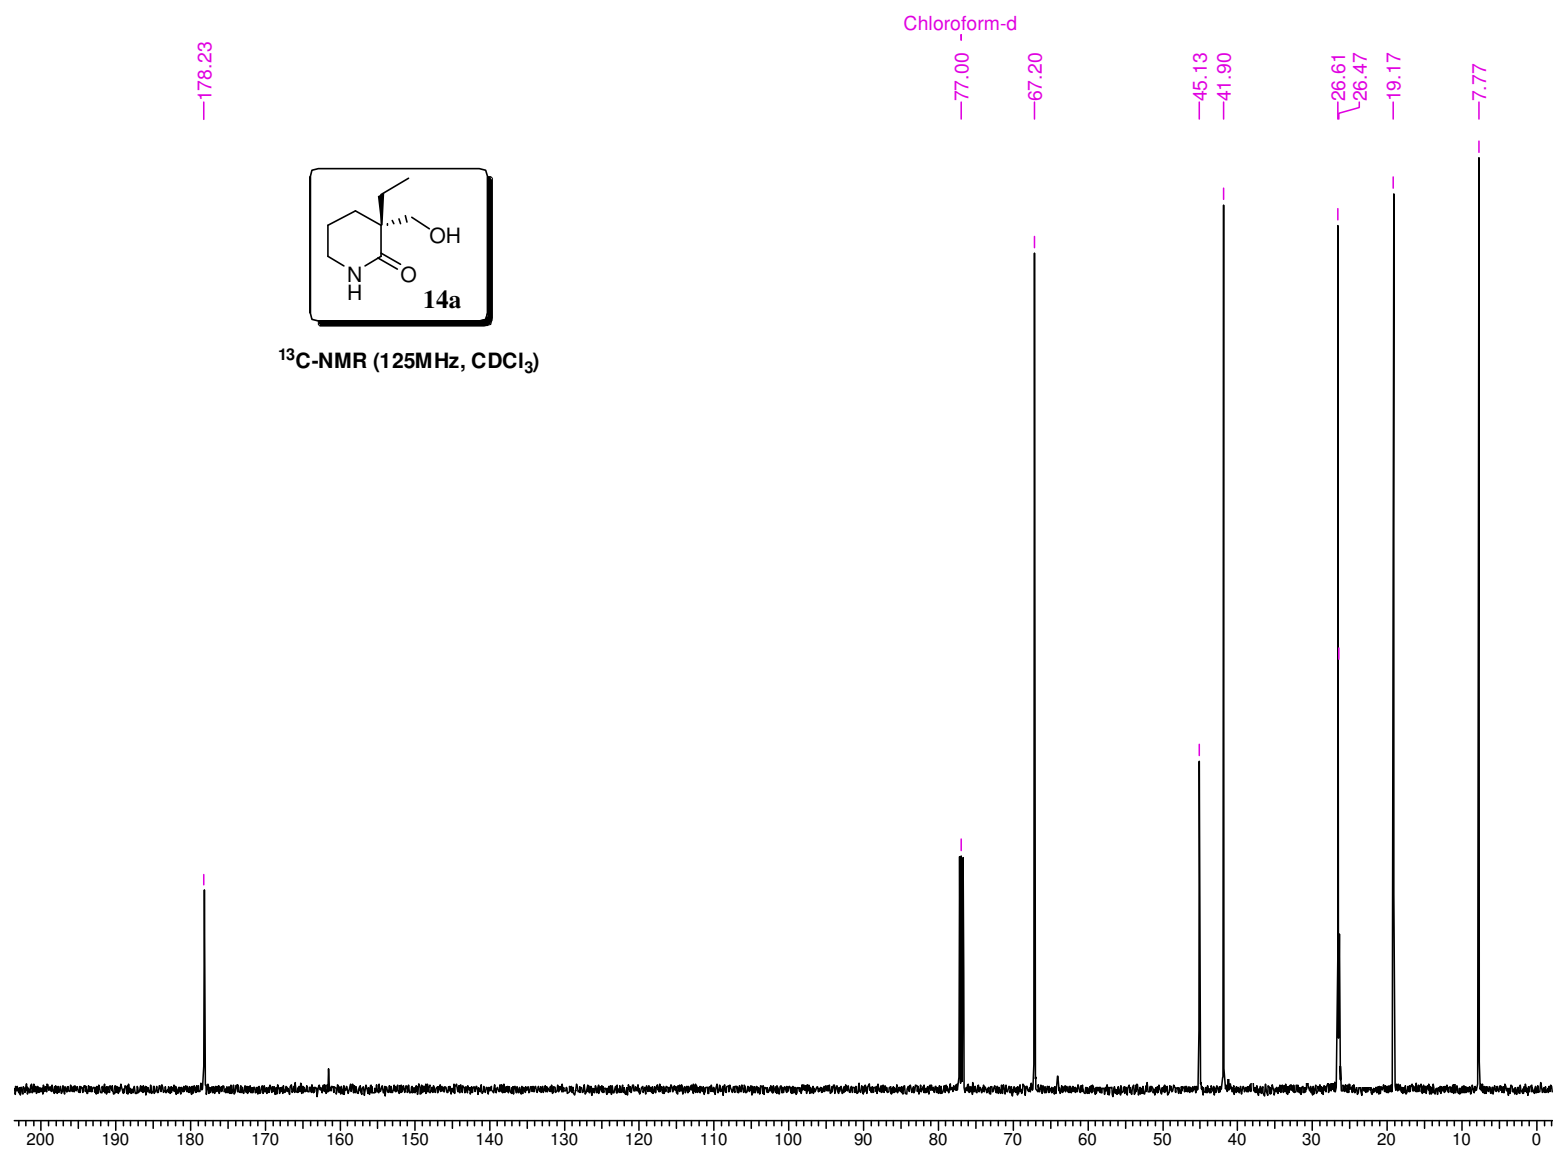

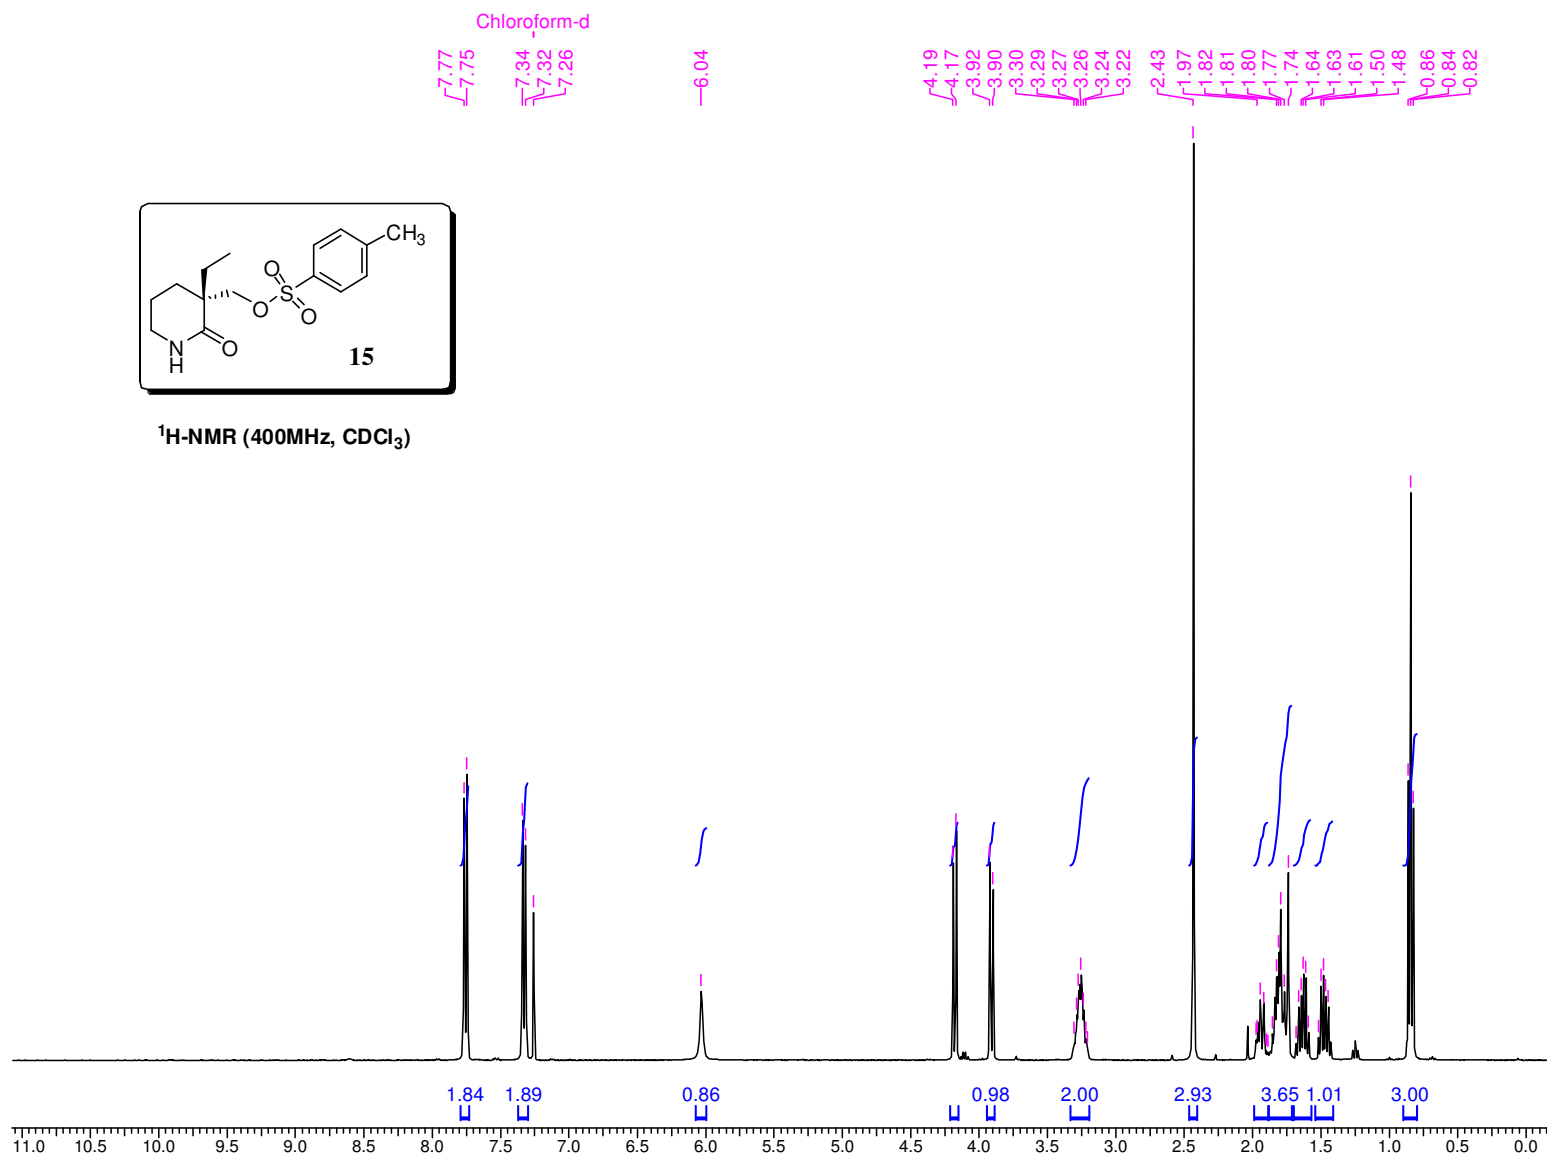

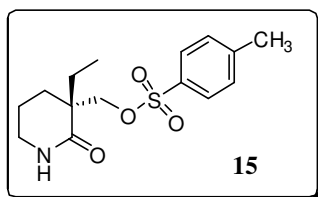

$^{13}\text{C-NMR}$  (100MHz,  $\text{CDCl}_3$ )

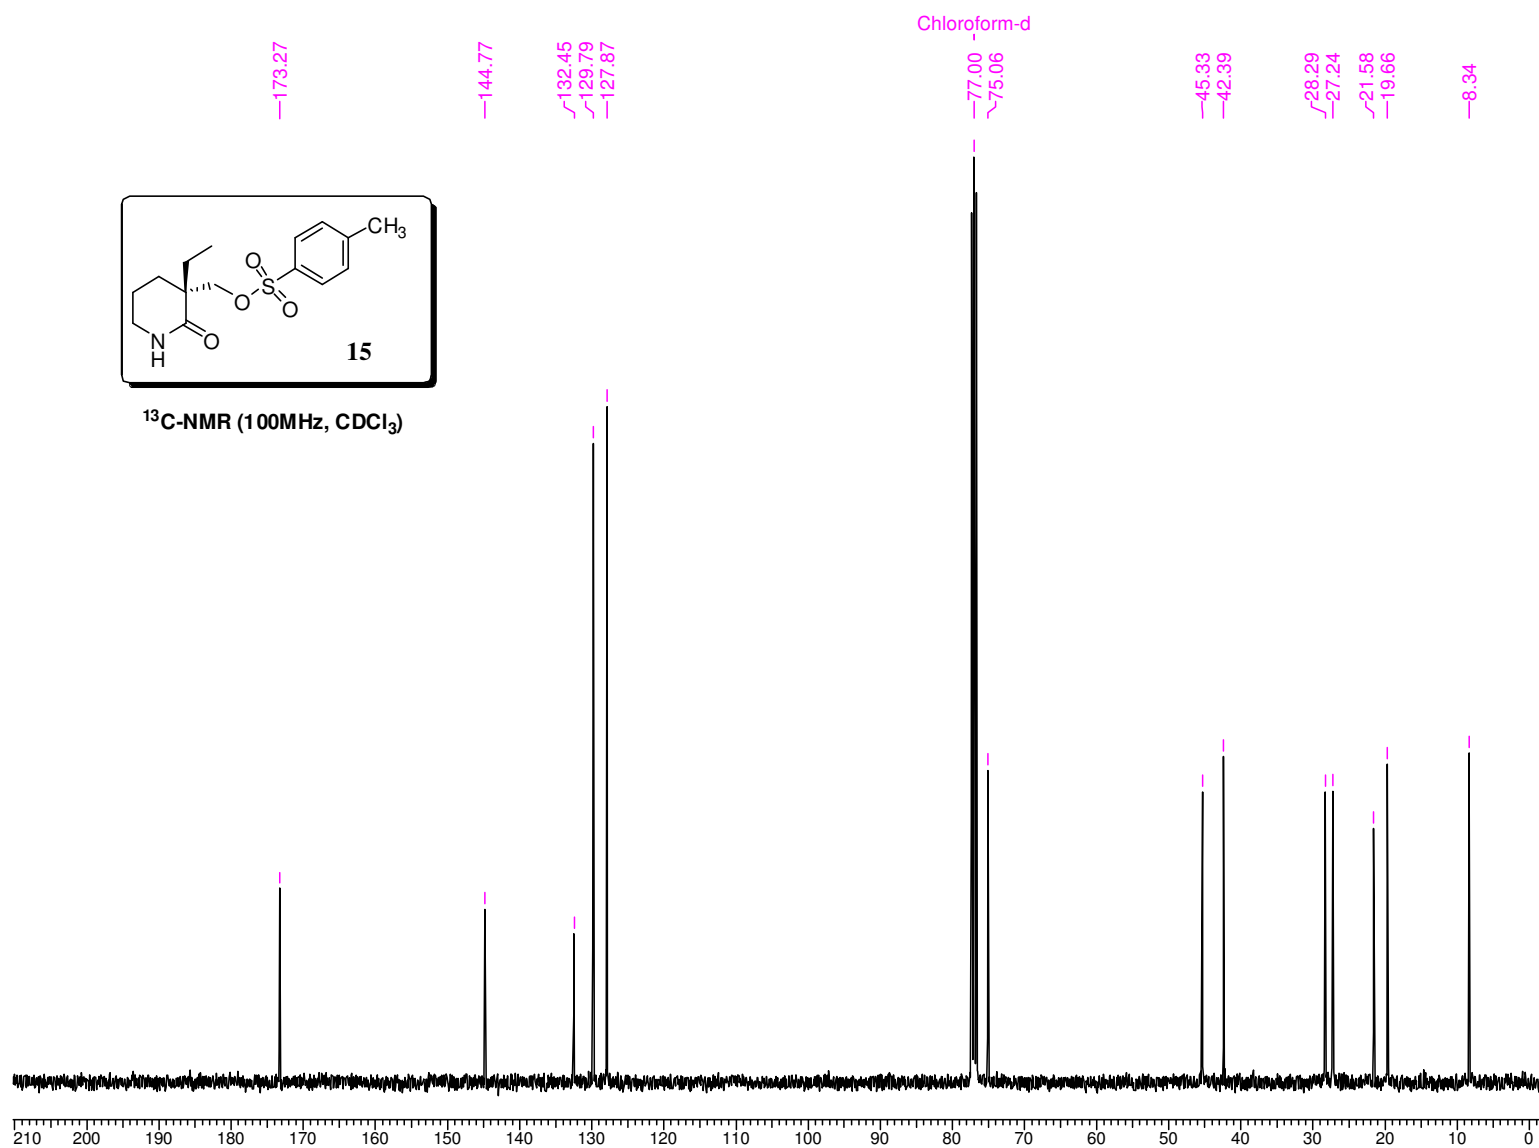

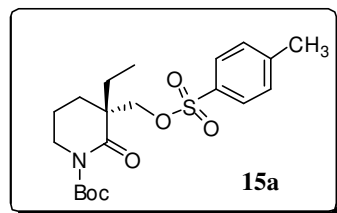

<sup>1</sup>H-NMR (200MHz, CDCl<sub>3</sub>)

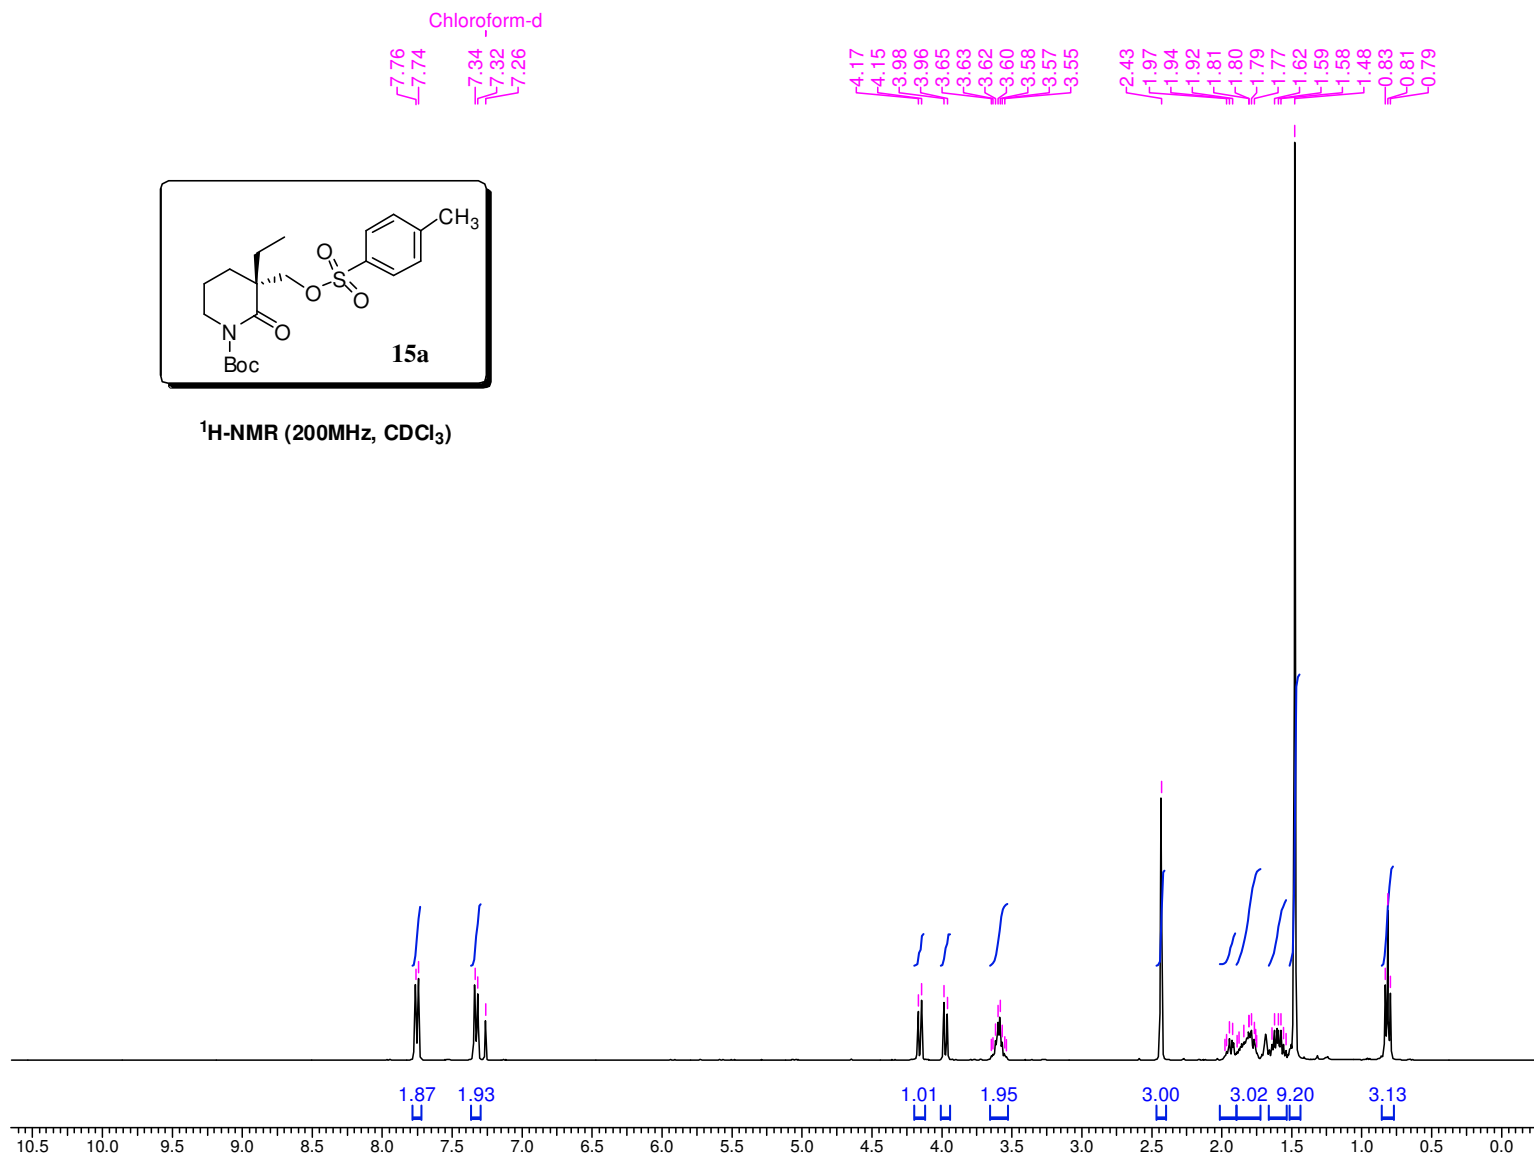

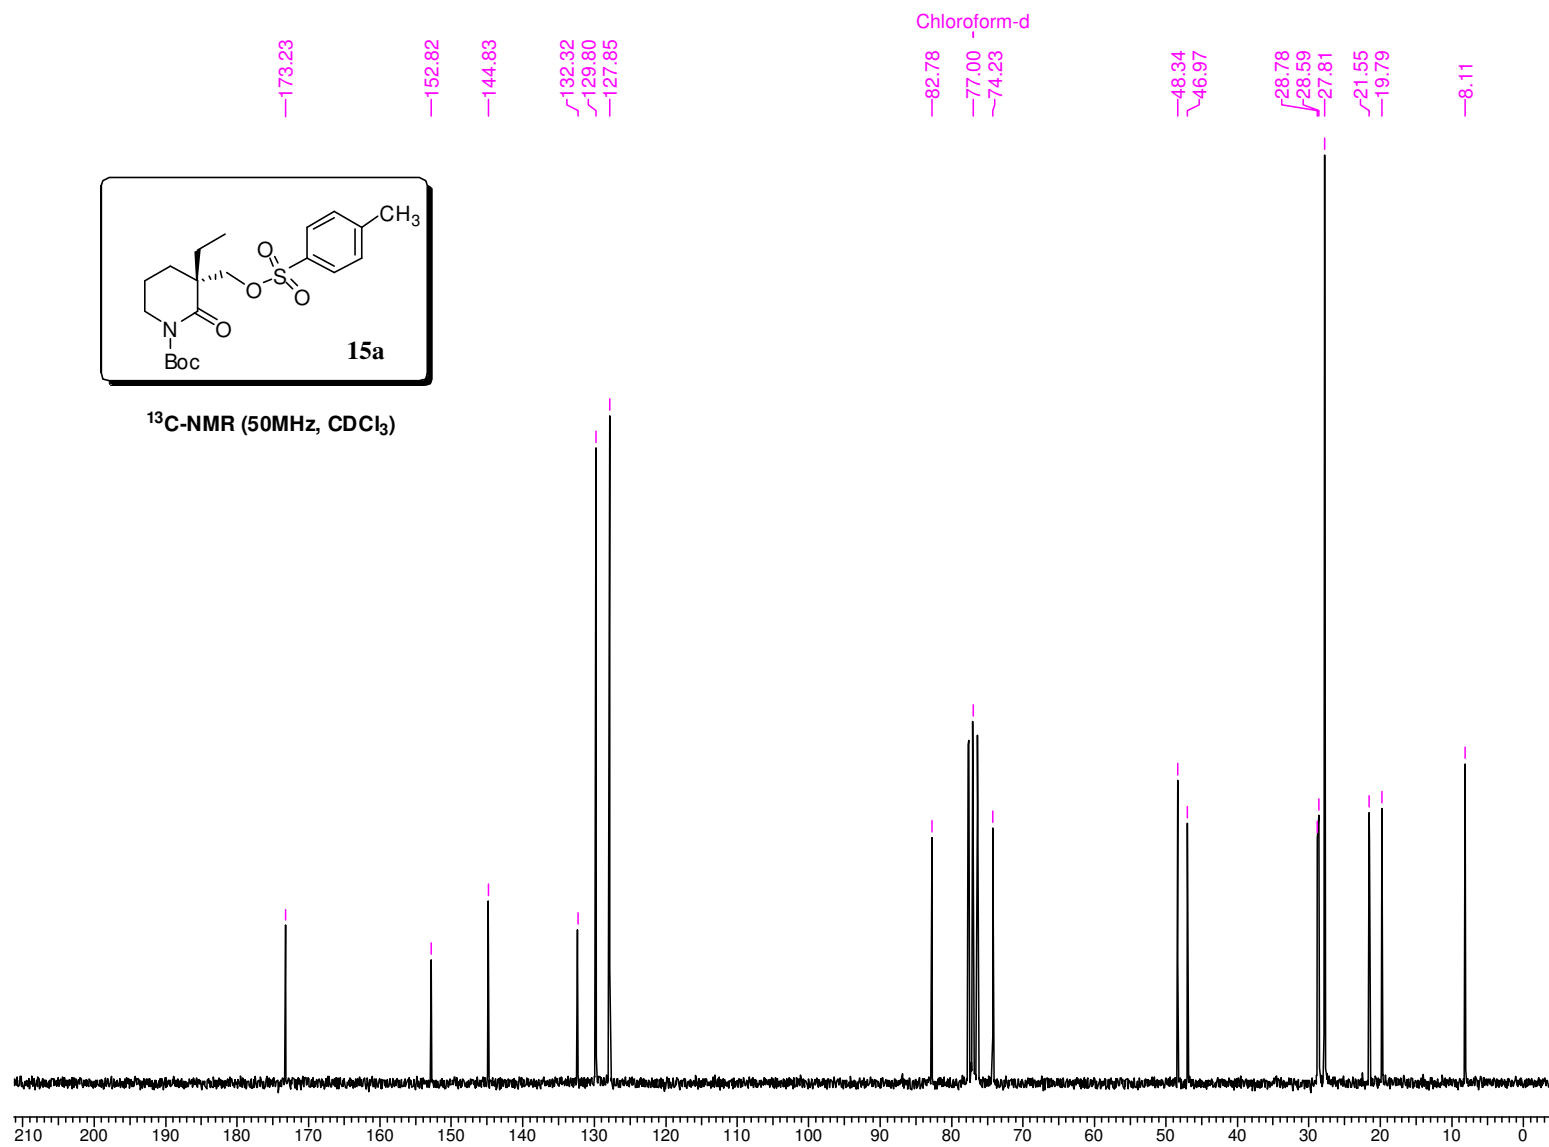

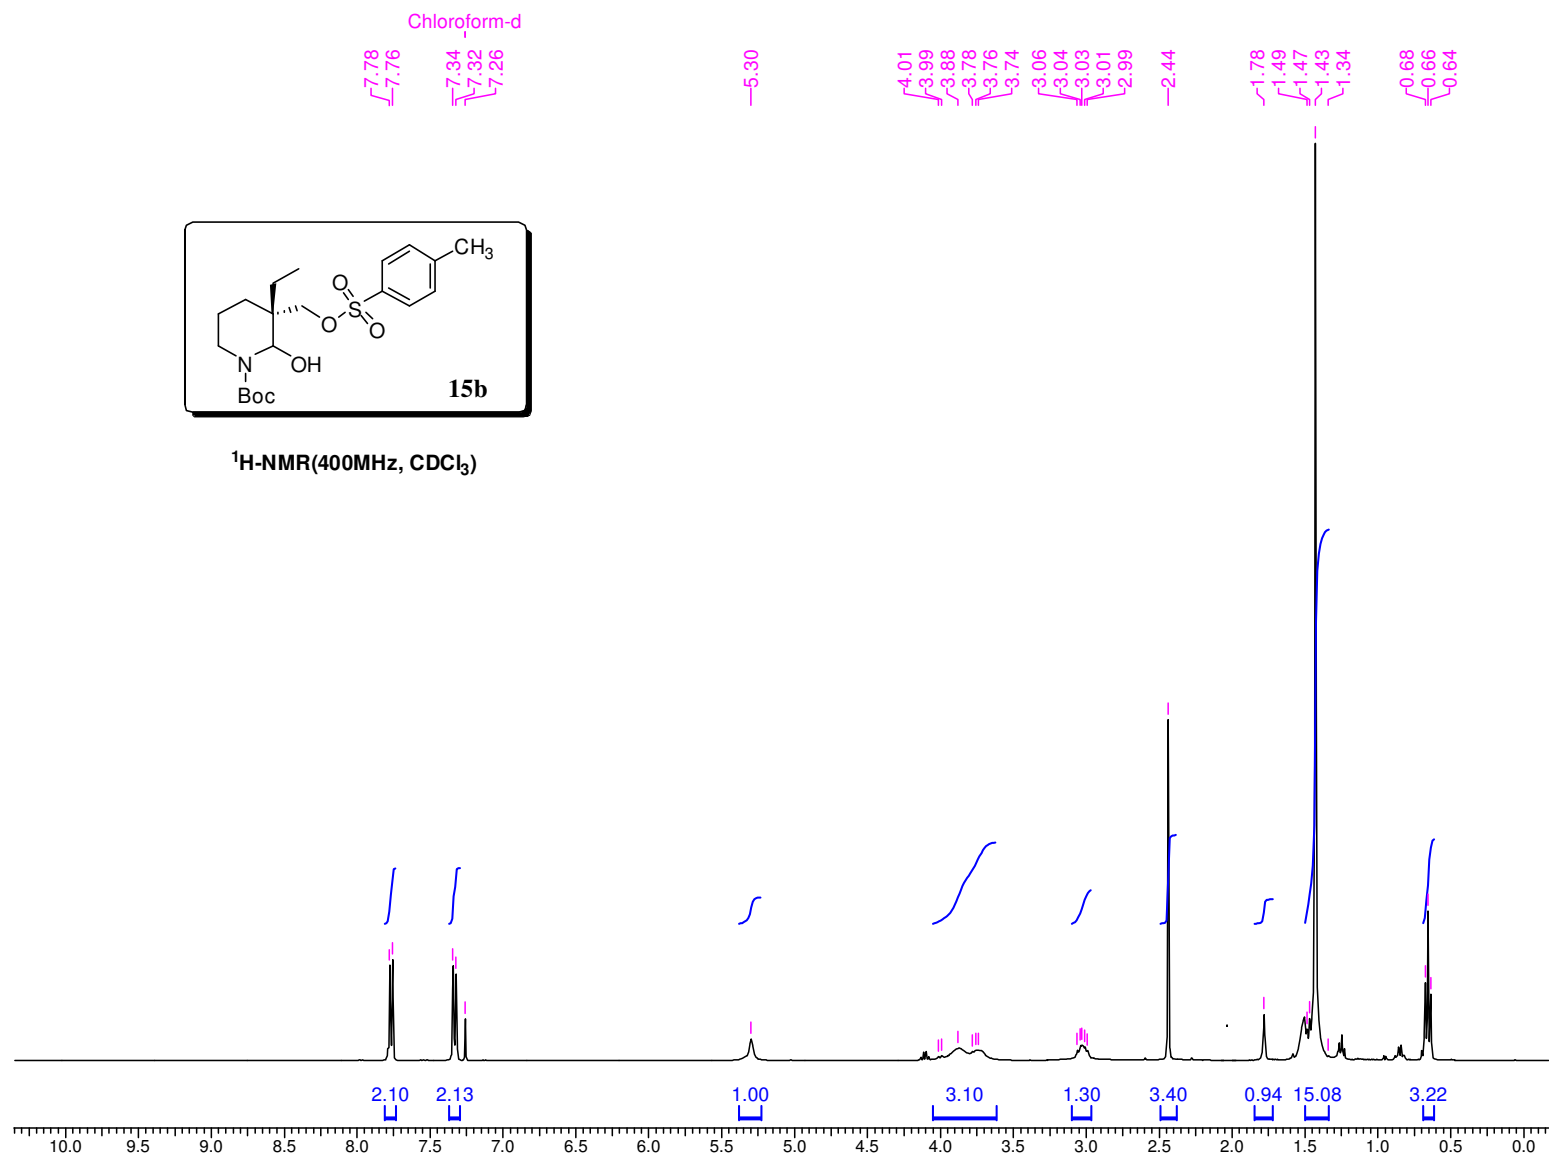

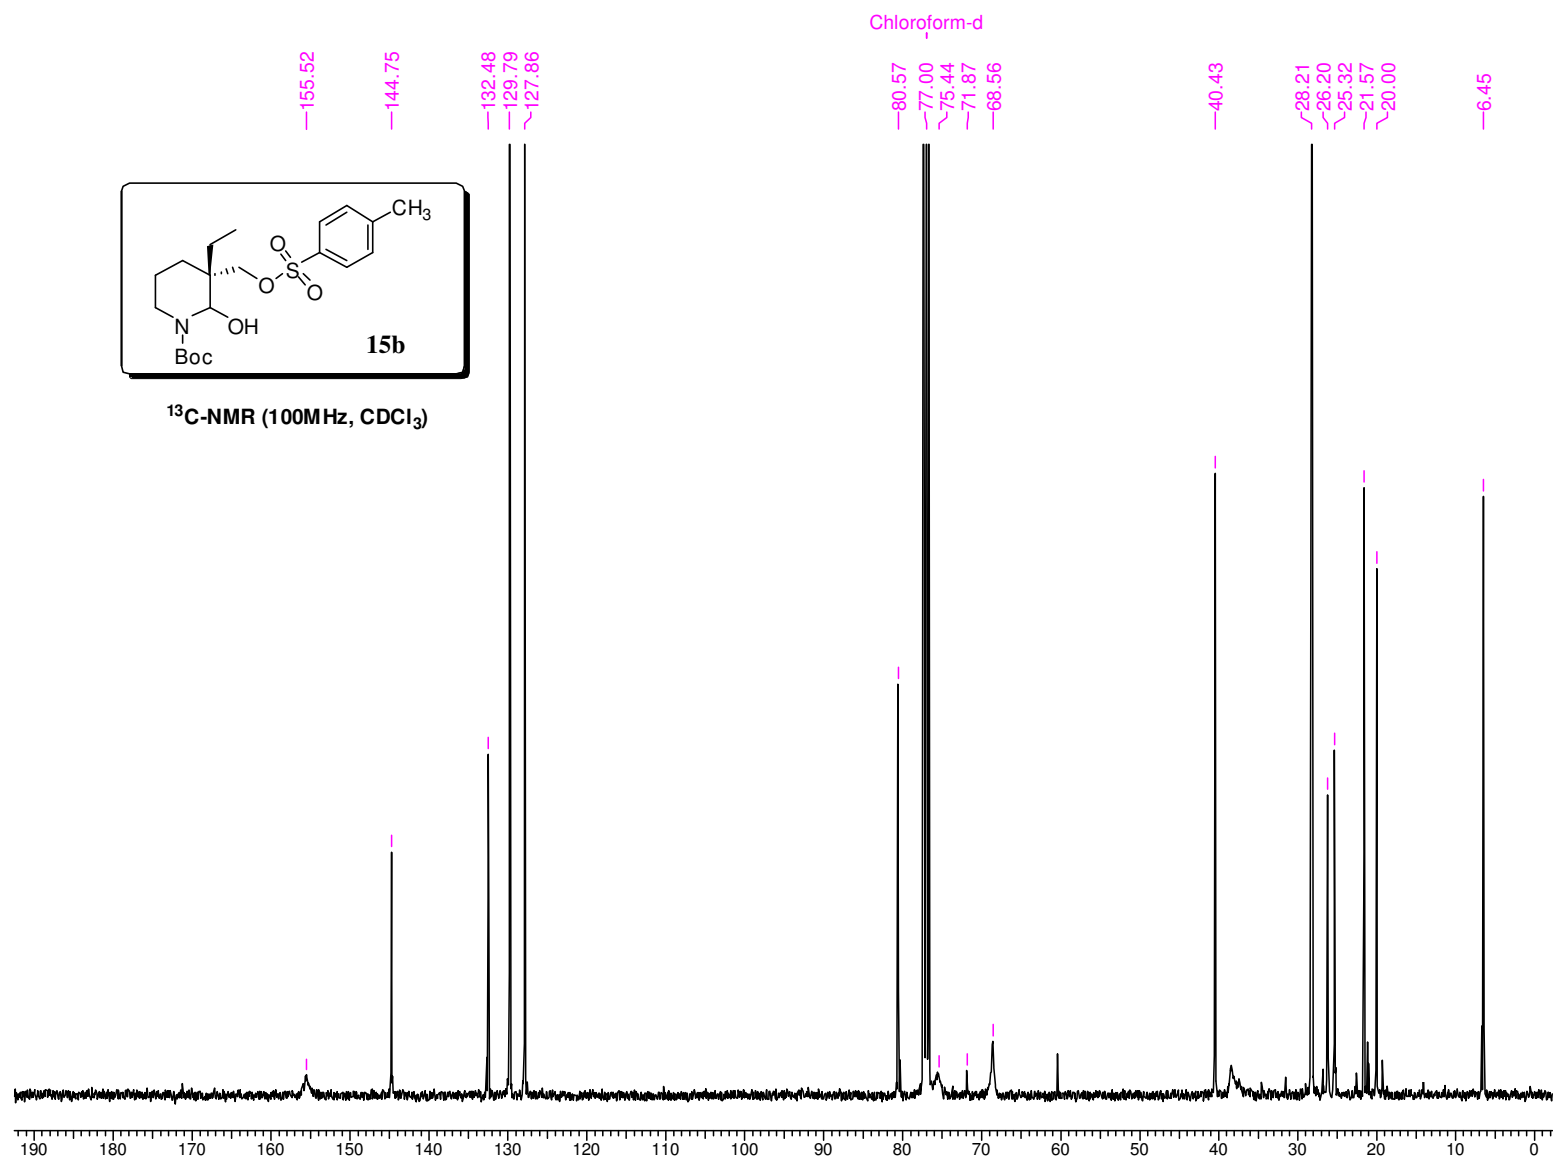



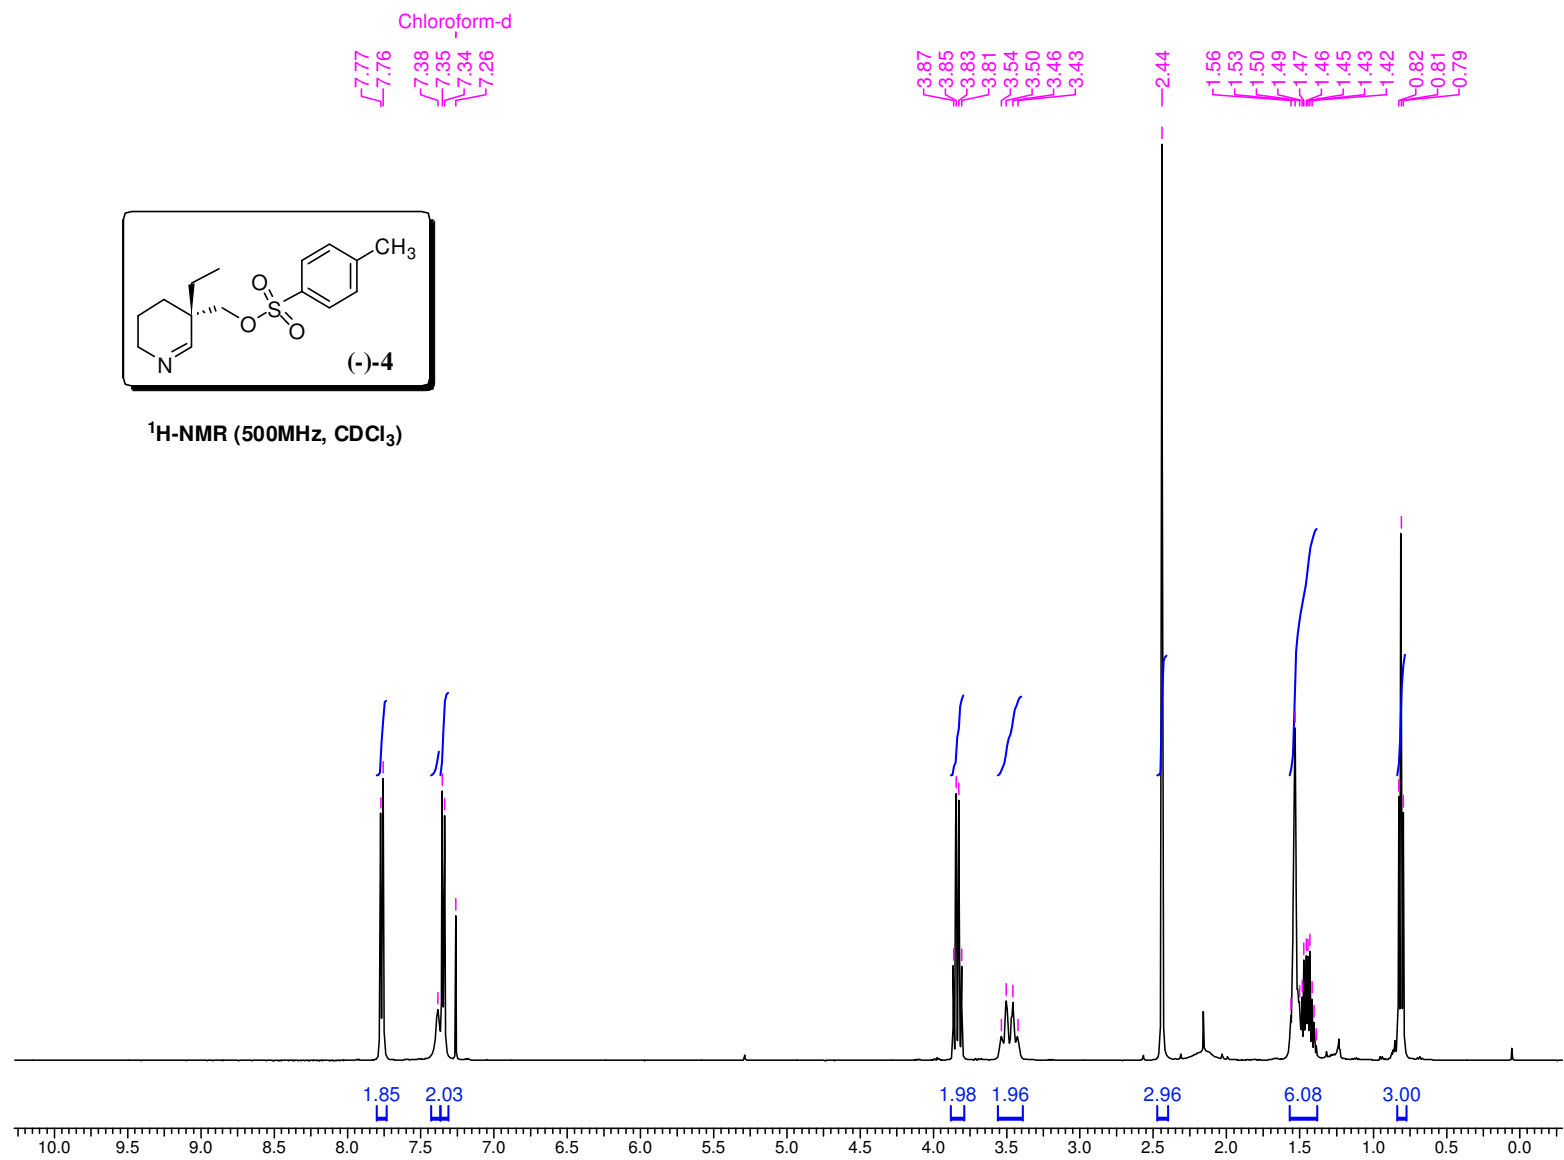

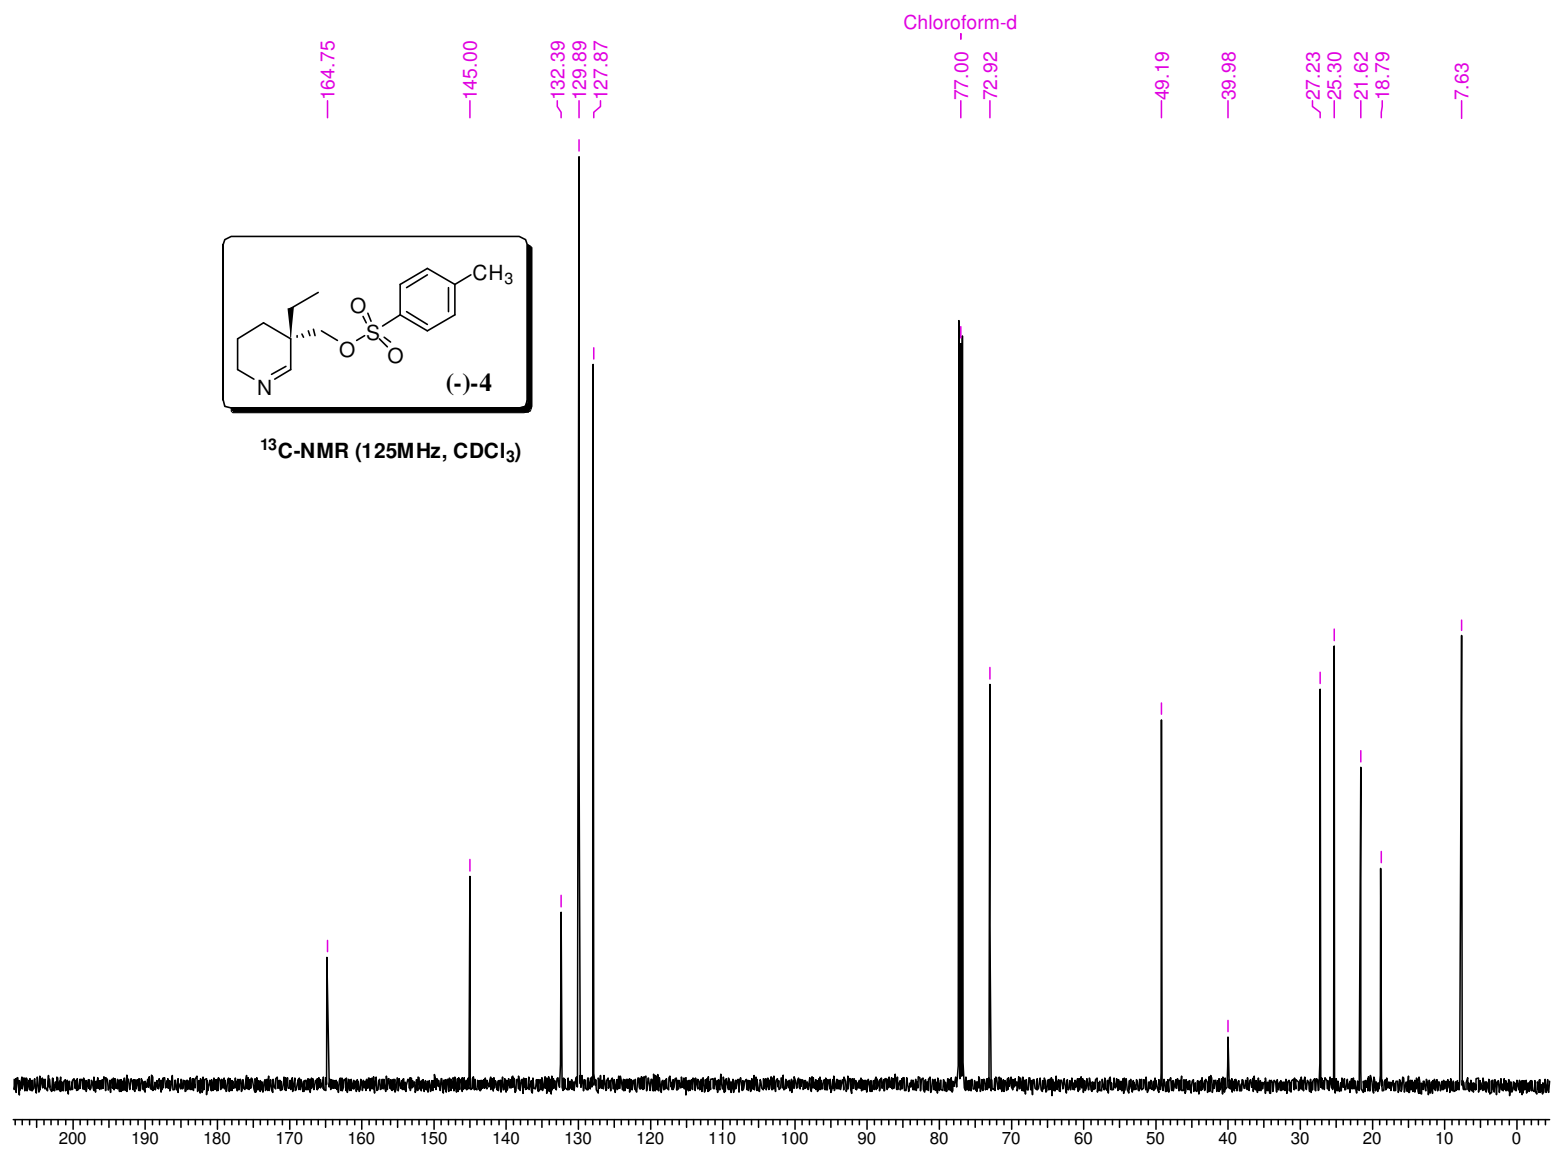

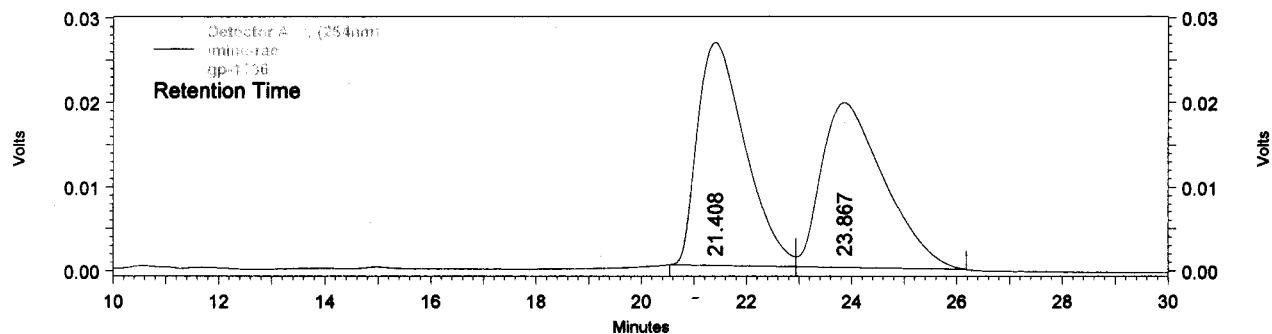

**Detector A - 1 (254nm)**

| Pk #   | Retention Time | Area    | Area %  |
|--------|----------------|---------|---------|
| 1      | 21.408         | 1674827 | 50.688  |
| 2      | 23.867         | 1629348 | 49.312  |
| Totals |                | 3304175 | 100.000 |

Column : Chiralcel OJ-H- (4.6x250mm)  
 Mobile Phase : IPA:Pet ether (15:85)  
 Wavelength : 254nm  
 Flow Rate : 0.7ml/min 33kgf  
 Sample Con : 2.3mg/0.5ml Inj vol-10ul

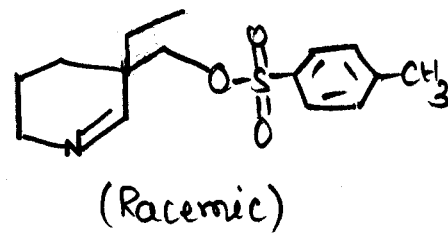

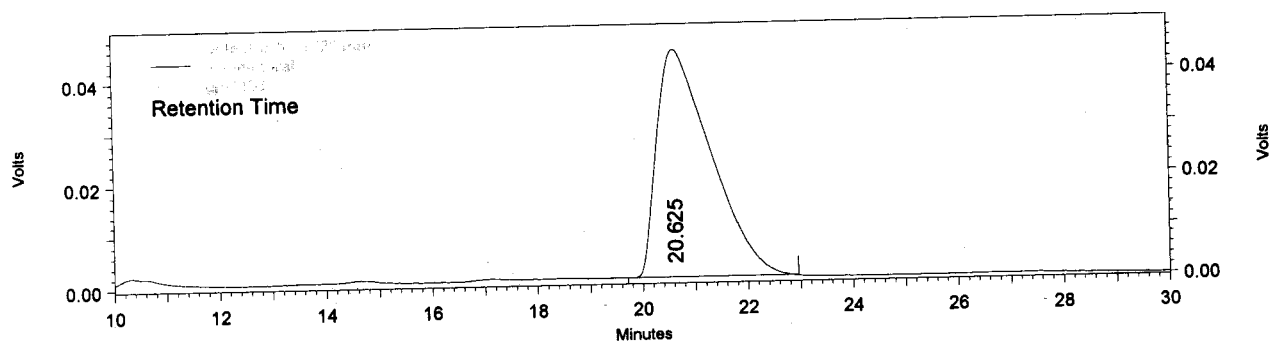

| Detector A - 1 (254nm) |                |         |         |
|------------------------|----------------|---------|---------|
| Pk #                   | Retention Time | Area    | Area %  |
| 1                      | 20.625         | 3155145 | 100.000 |
| Totals                 |                | 3155145 | 100.000 |

Column : Chiralcel OJ-H- (4.6x250mm)  
 Mobile Phase : IPA:Pet ether (15:85)  
 Wavelength : 254nm  
 Flow Rate : 0.7ml/min 33kgf  
 Sample Con : 2.3mg/0.5ml Inj vol-10ul

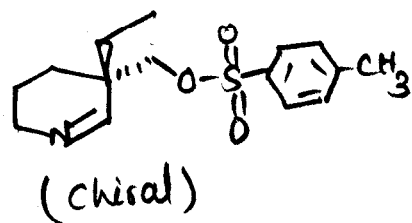

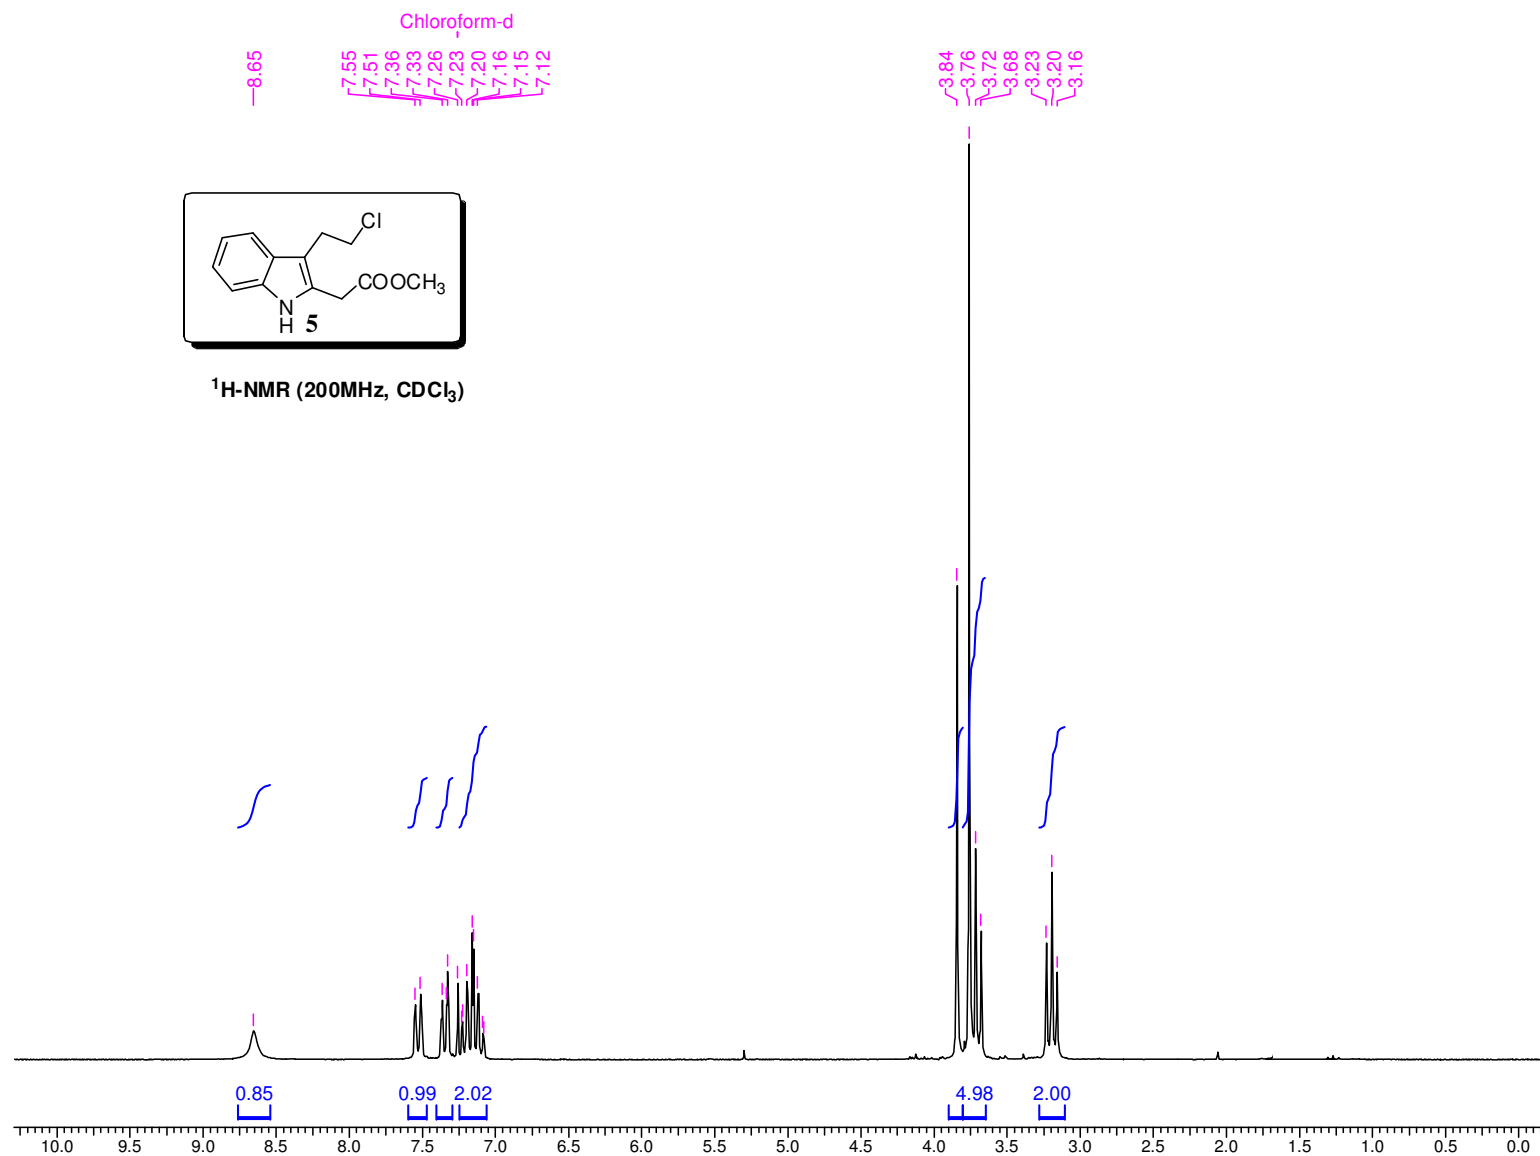

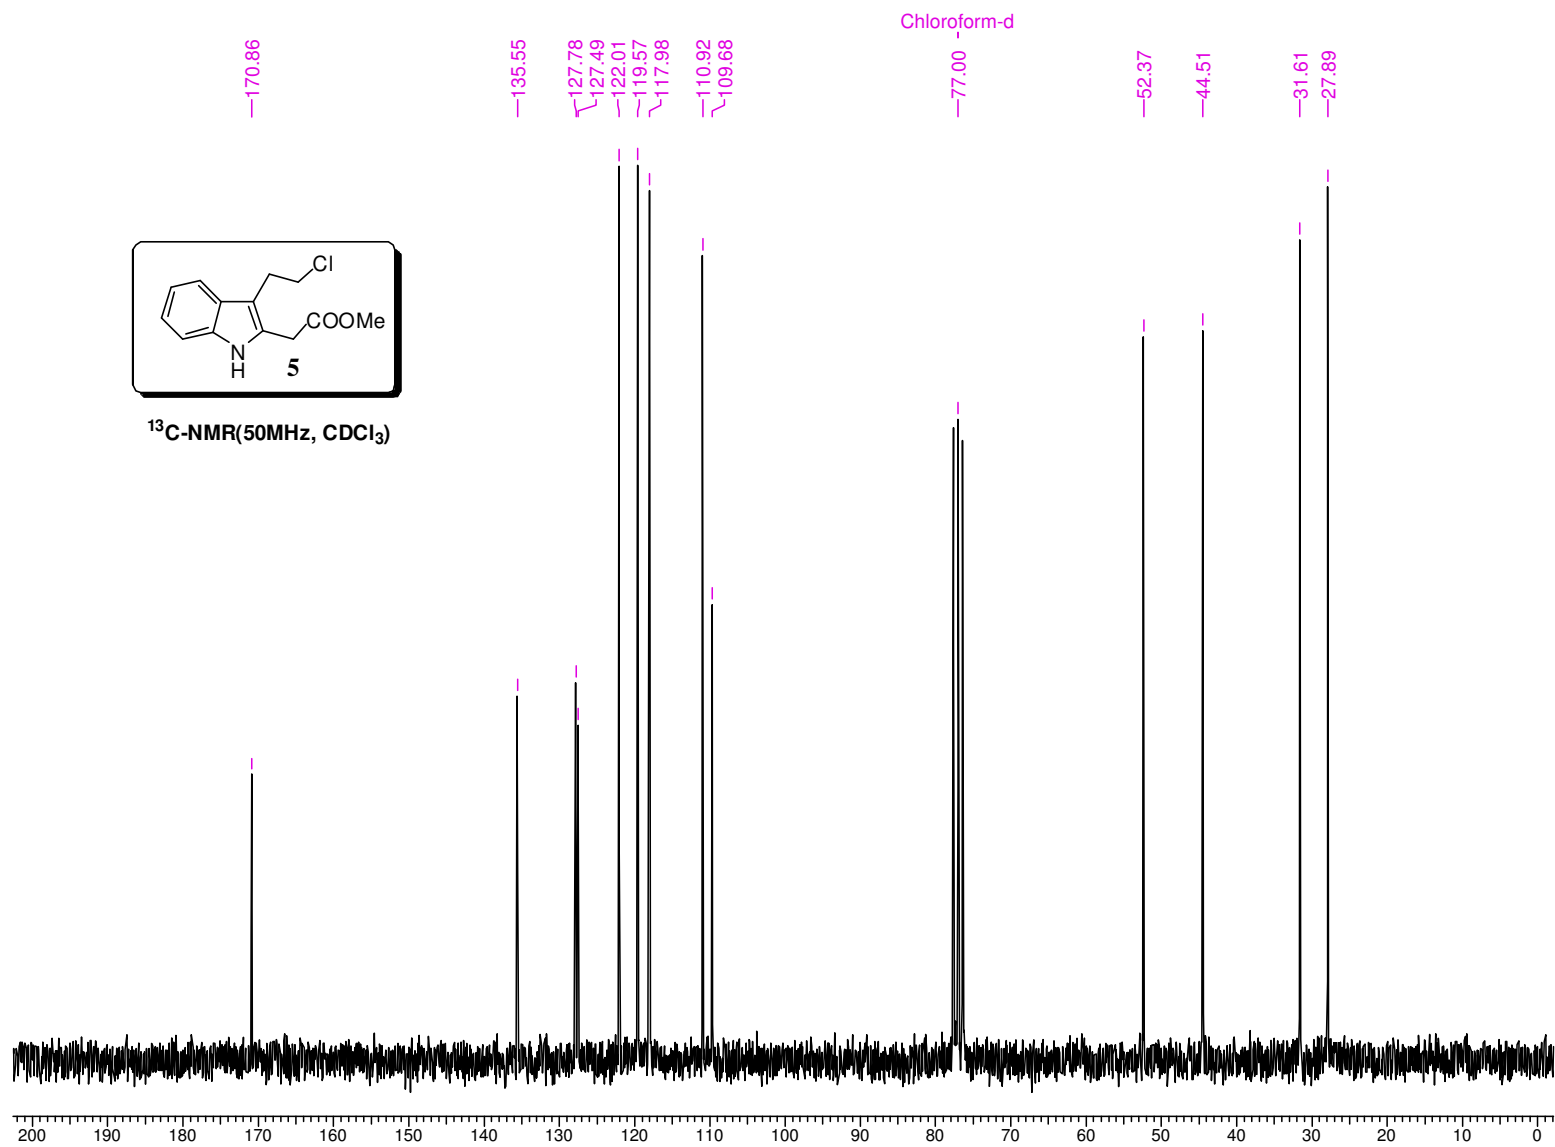

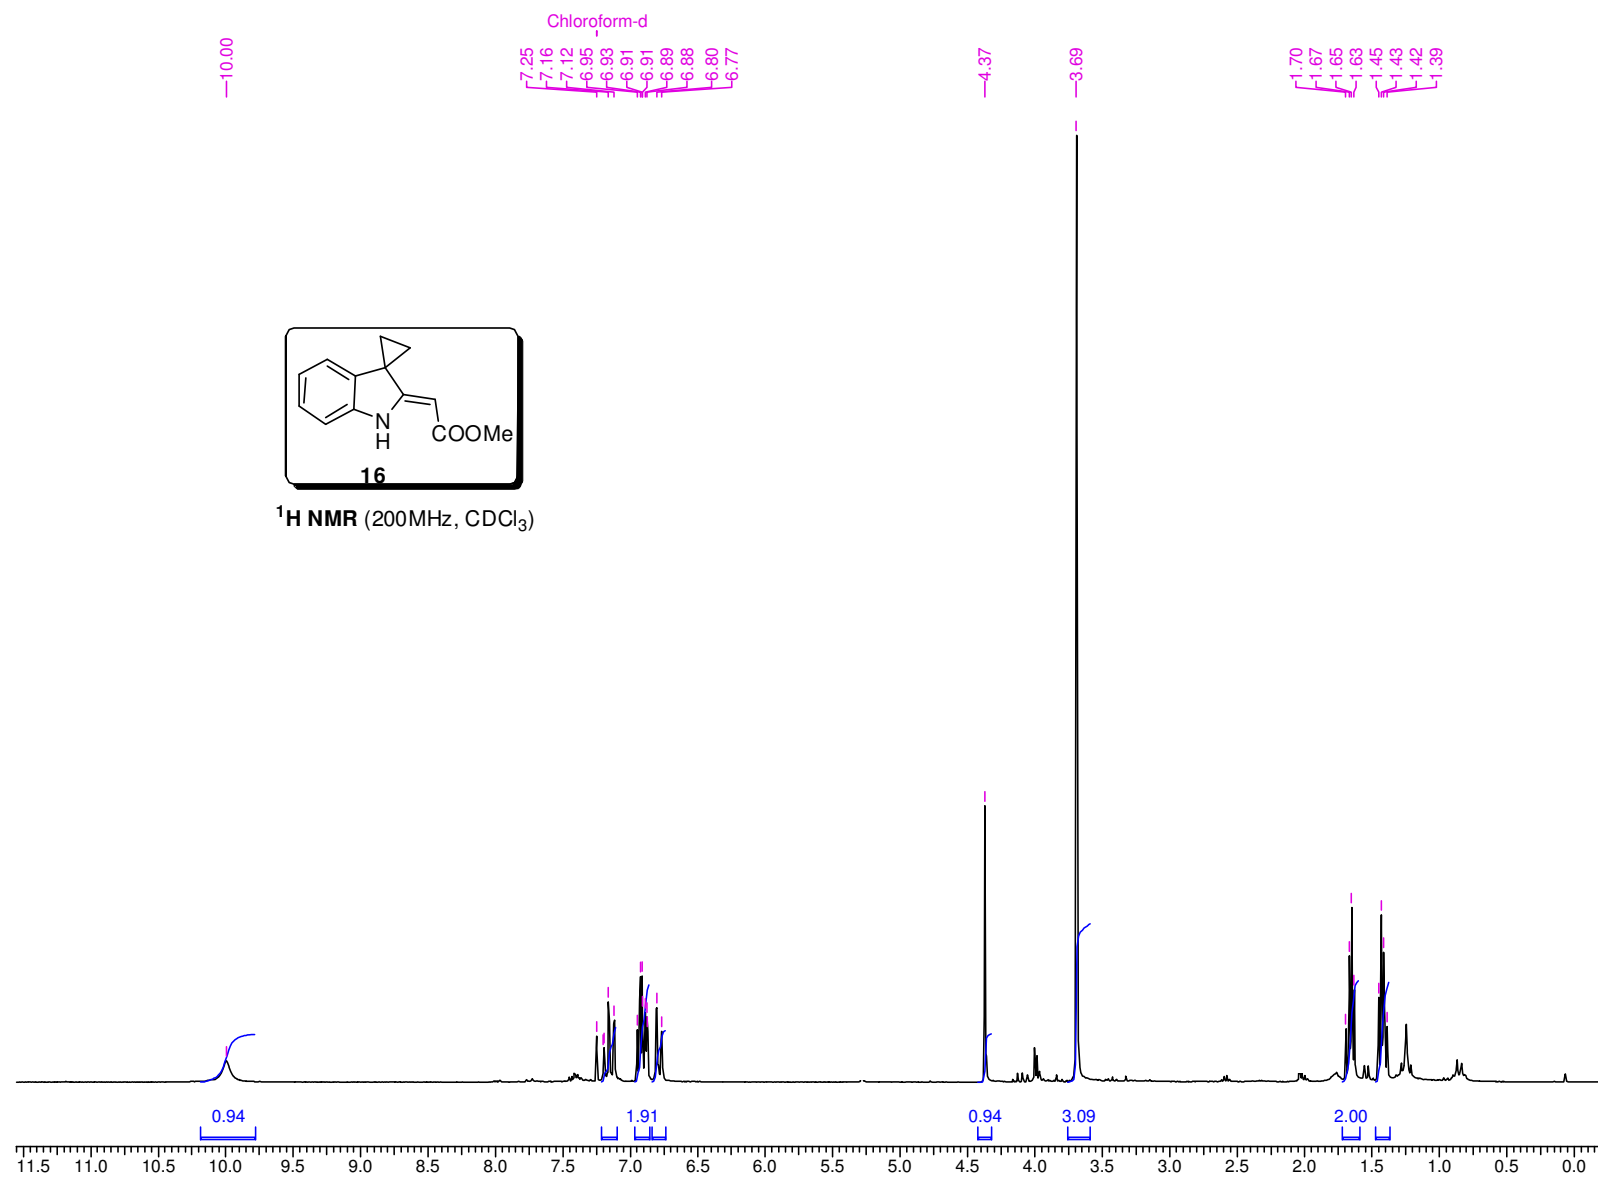

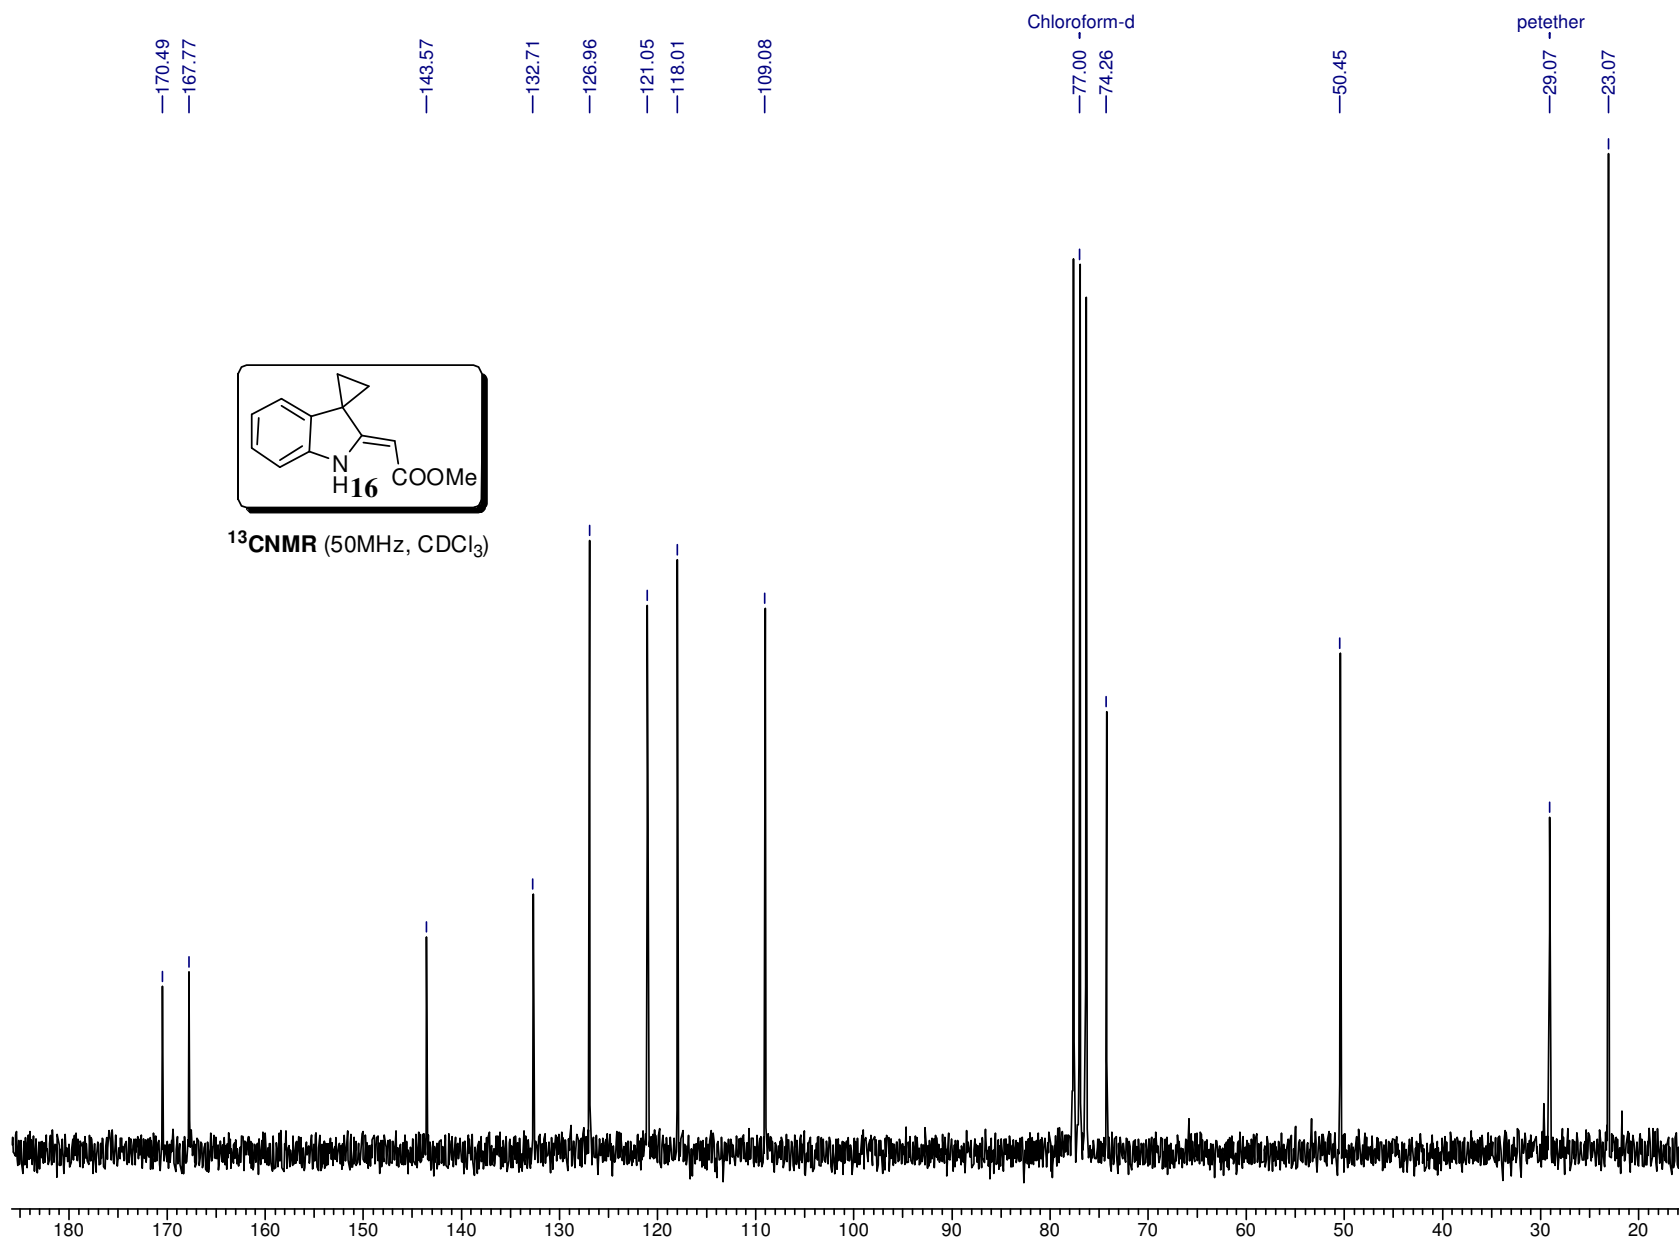



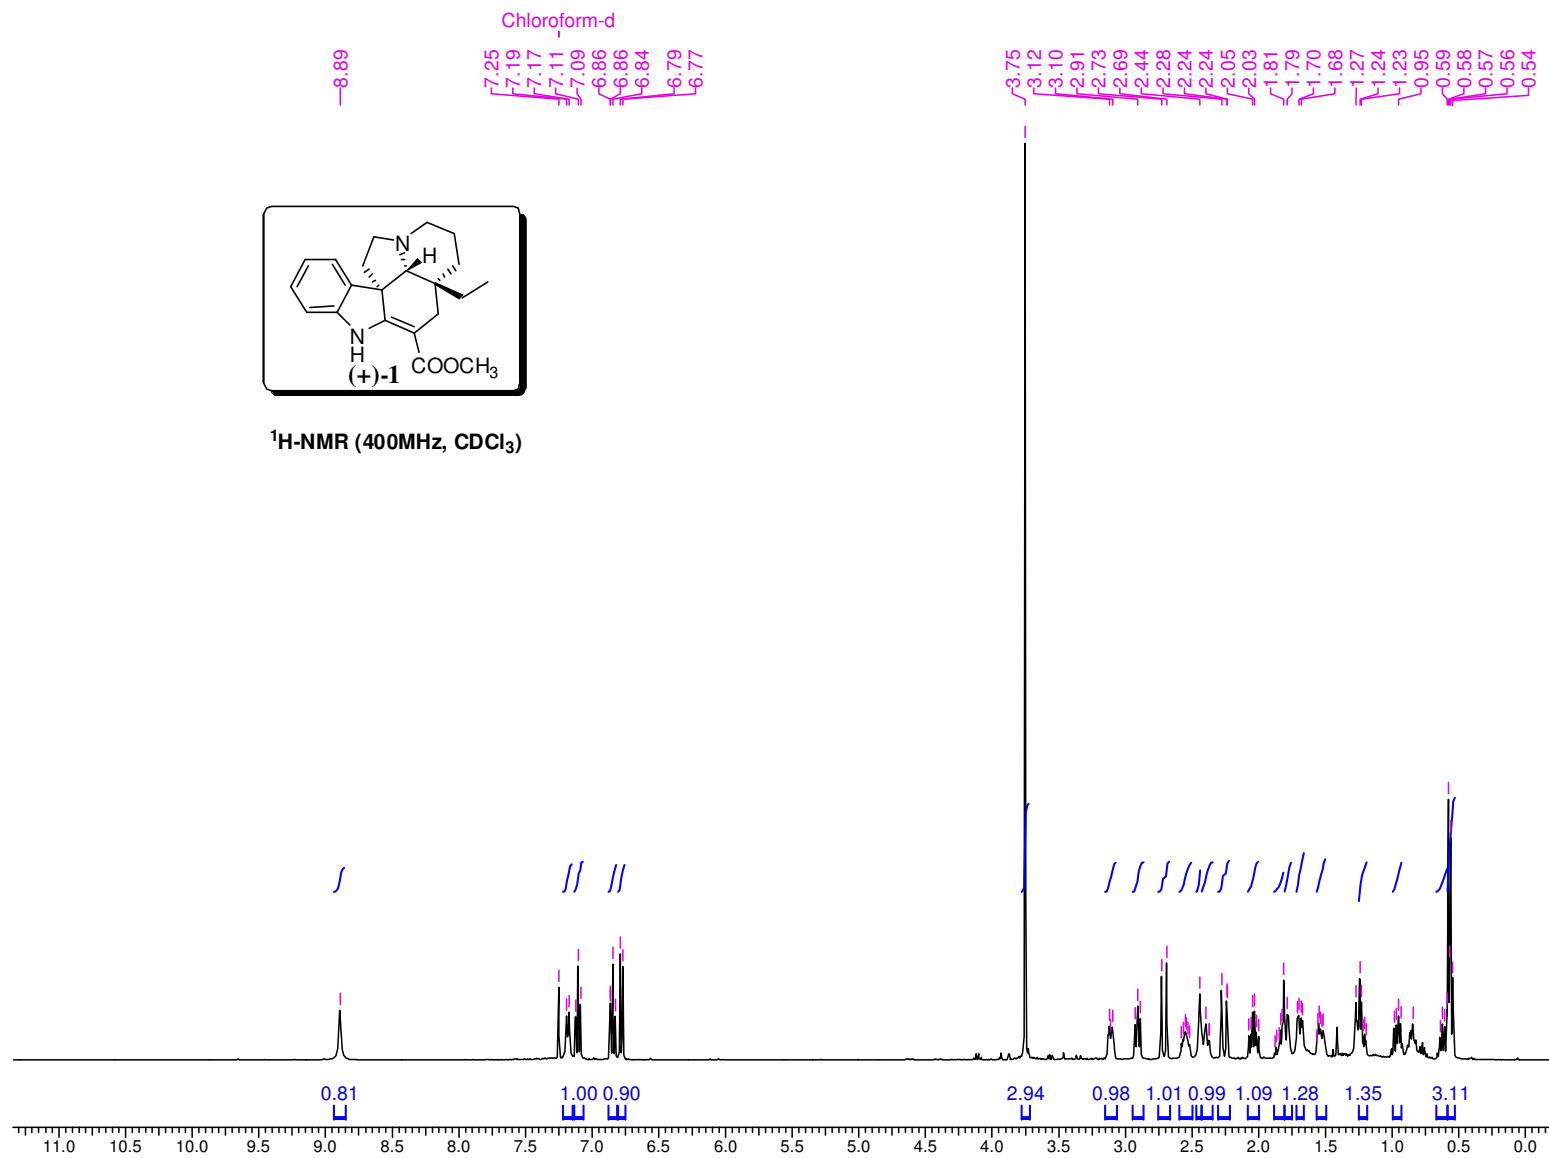

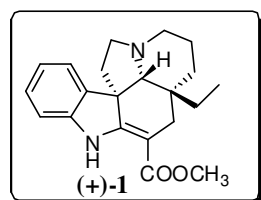

$^{13}\text{C}$ -NMR (100MHz,  $\text{CDCl}_3$ )

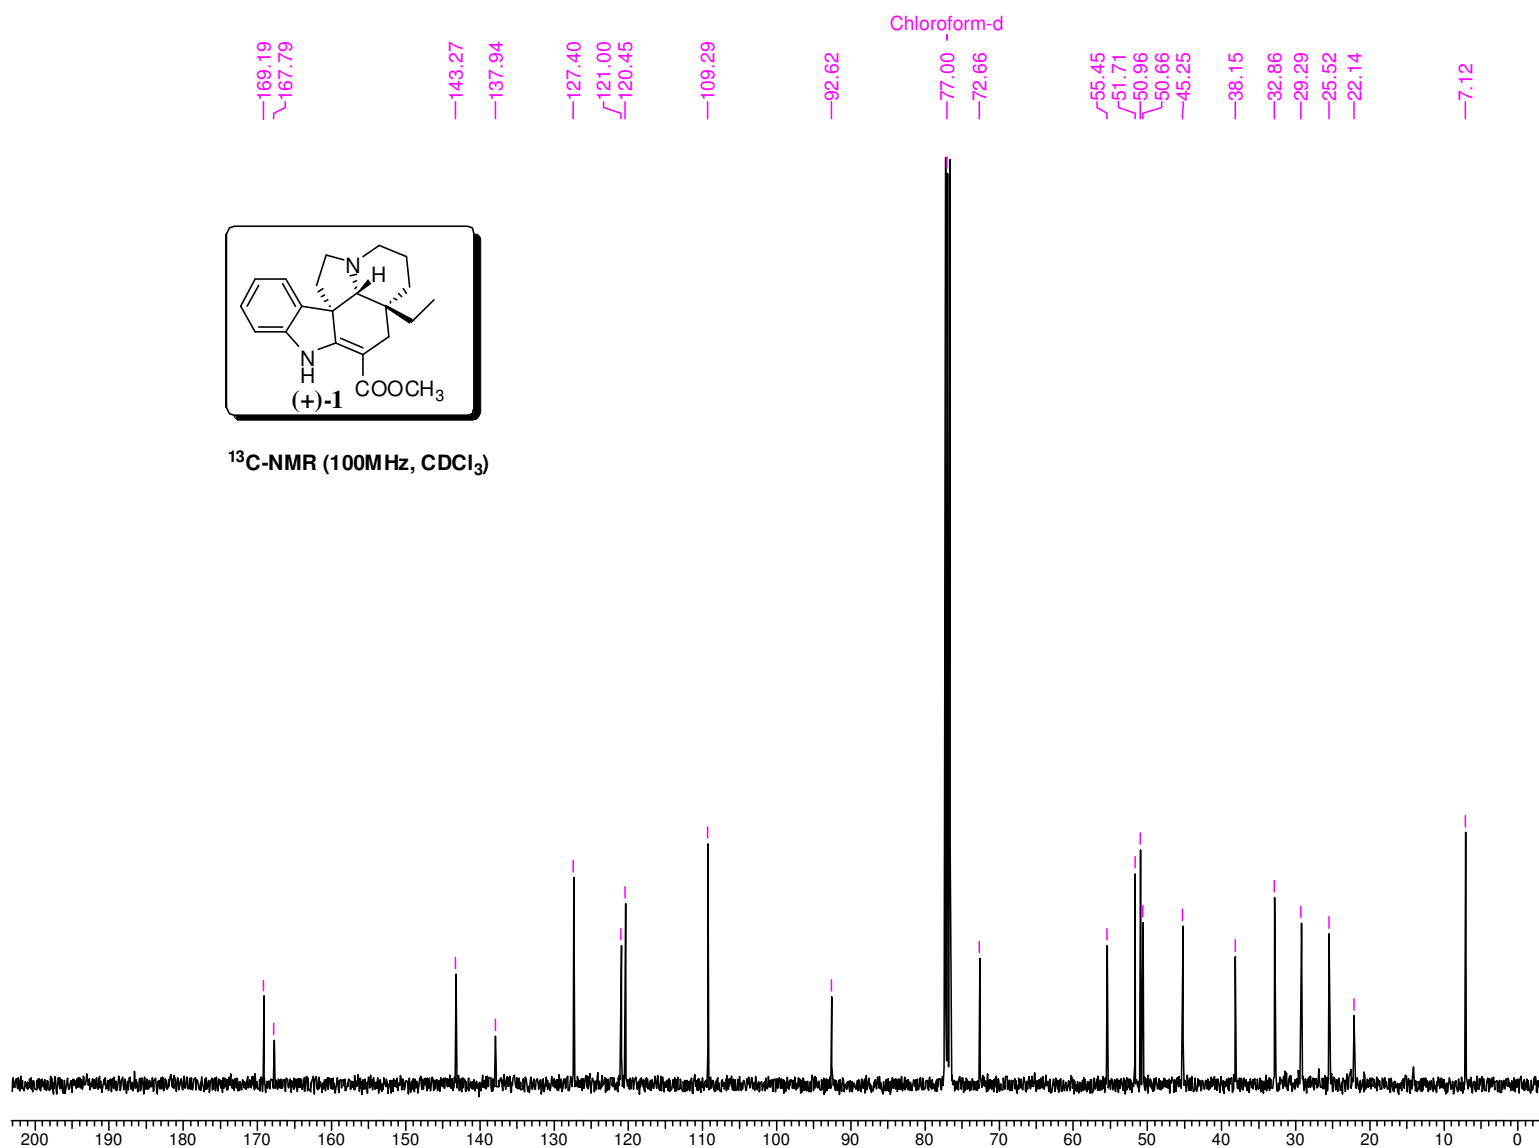

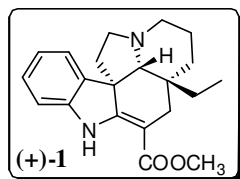

DEPT (100MHz, CDCl<sub>3</sub>)

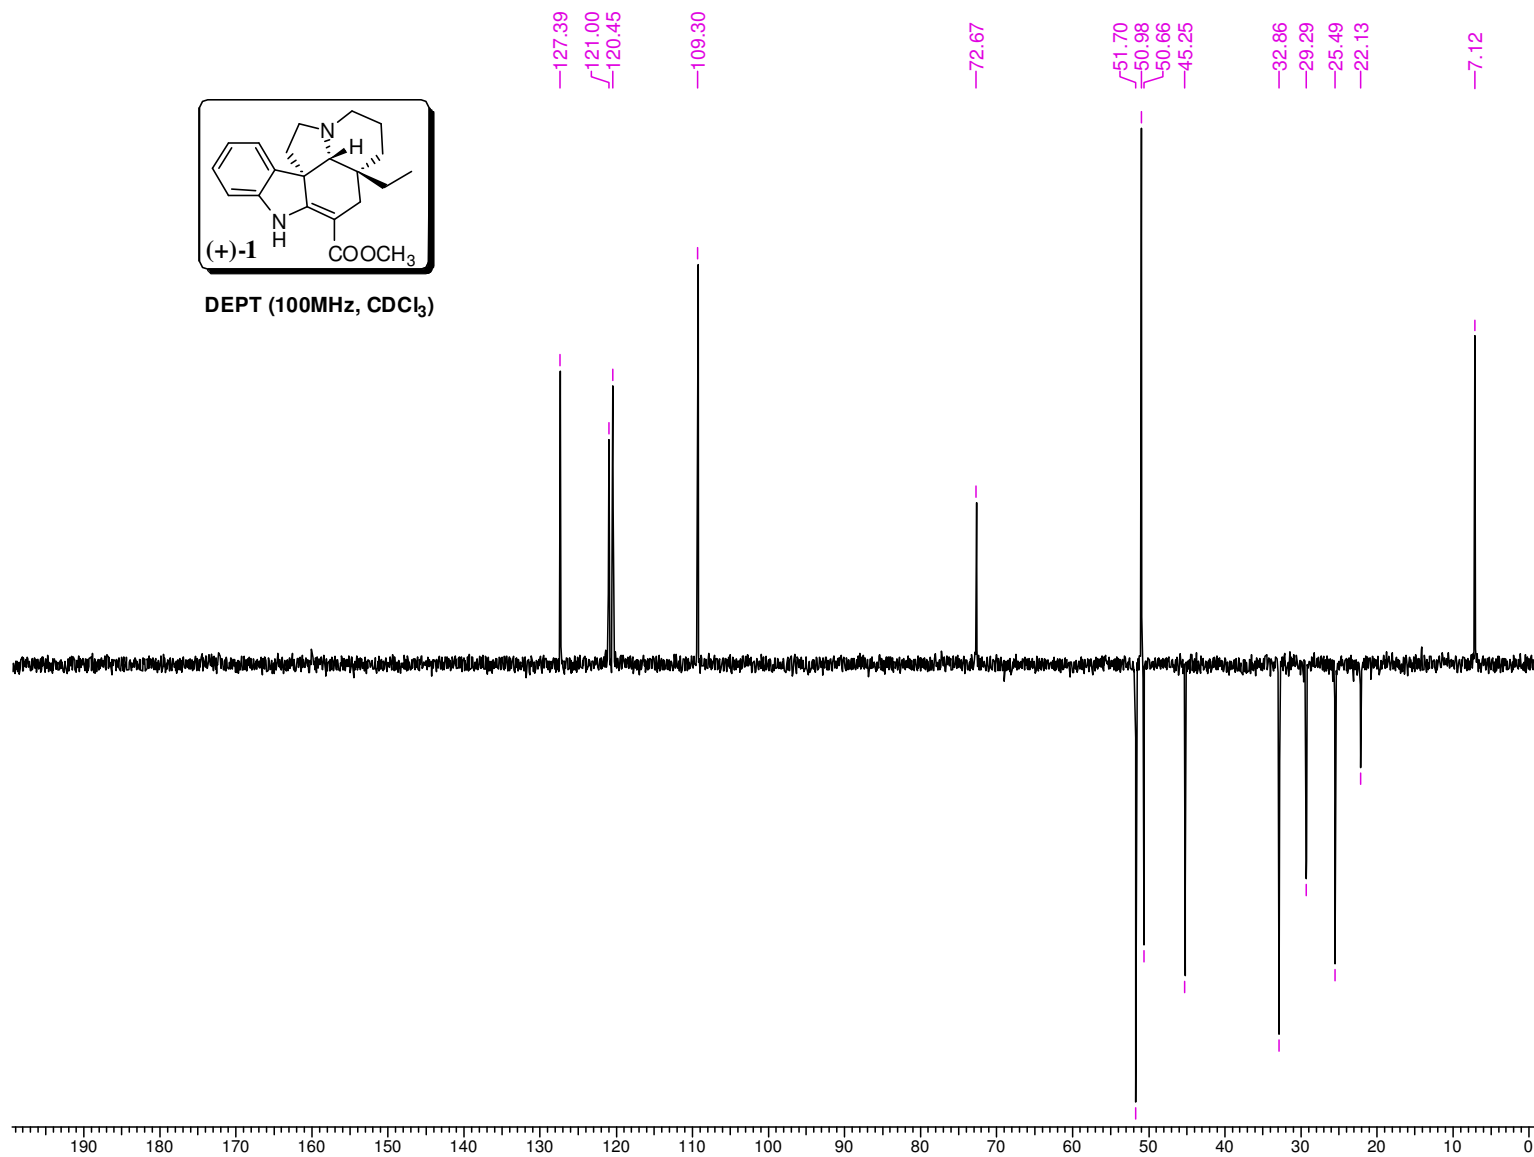

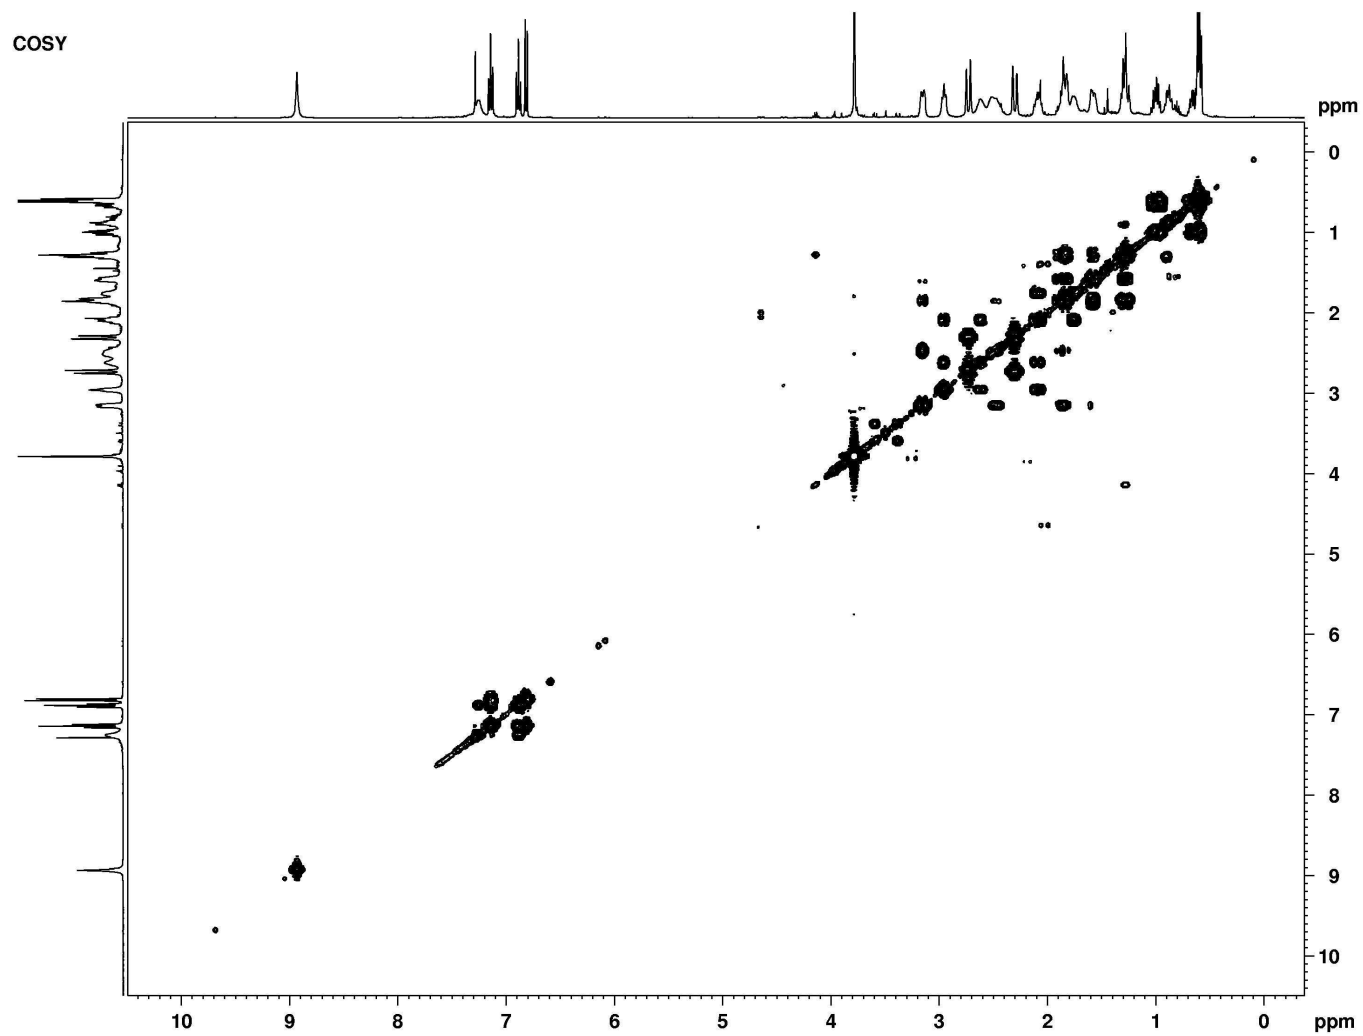

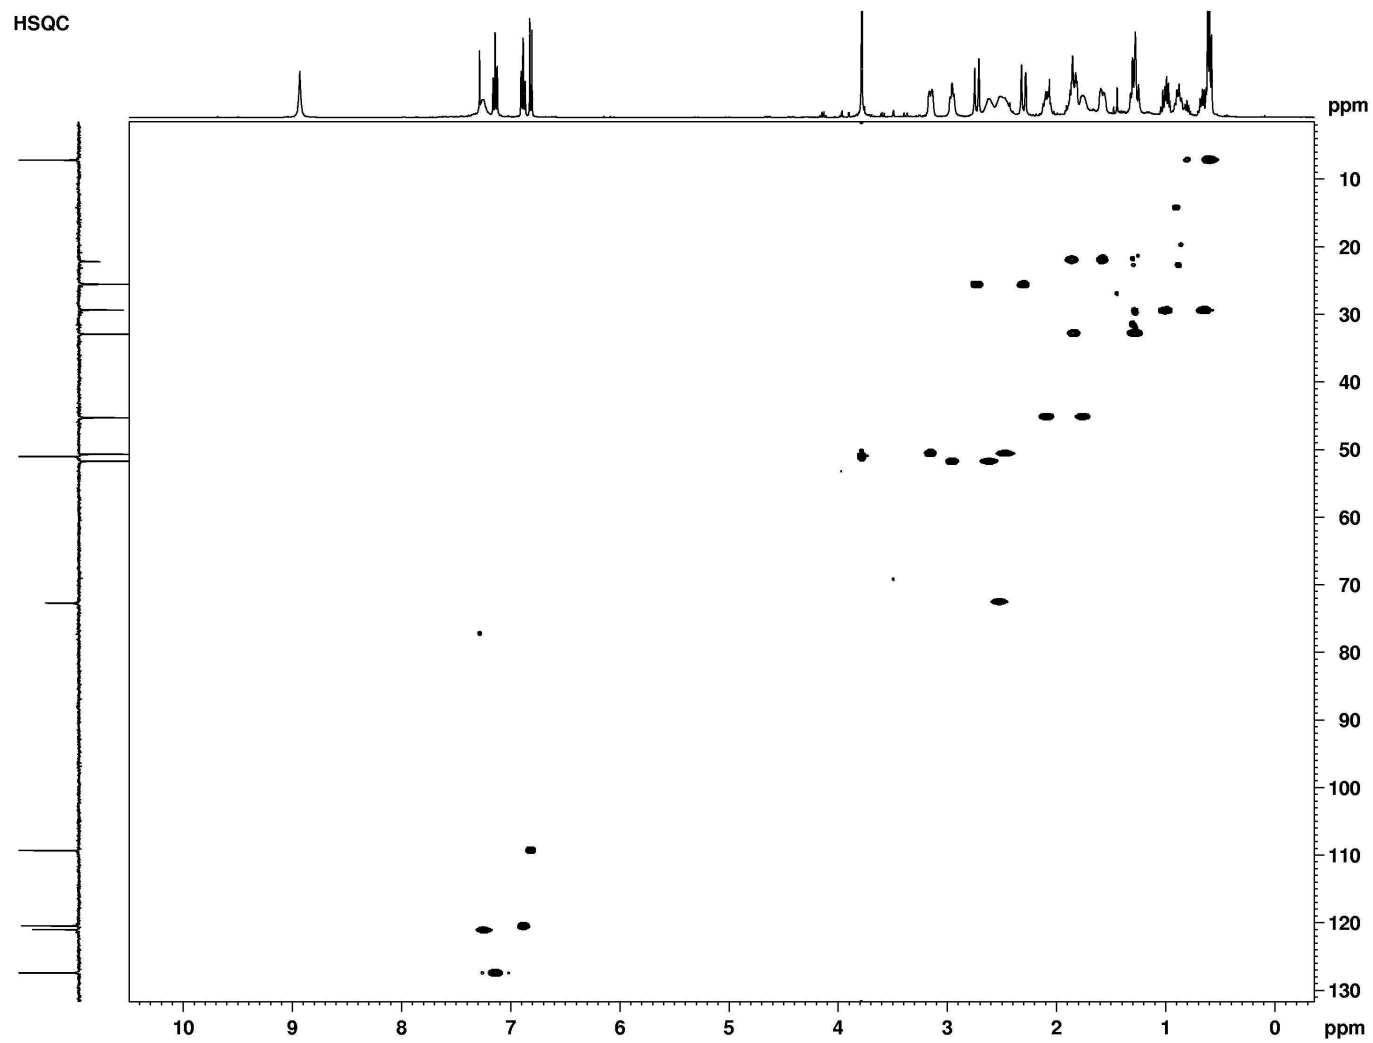

NOESY

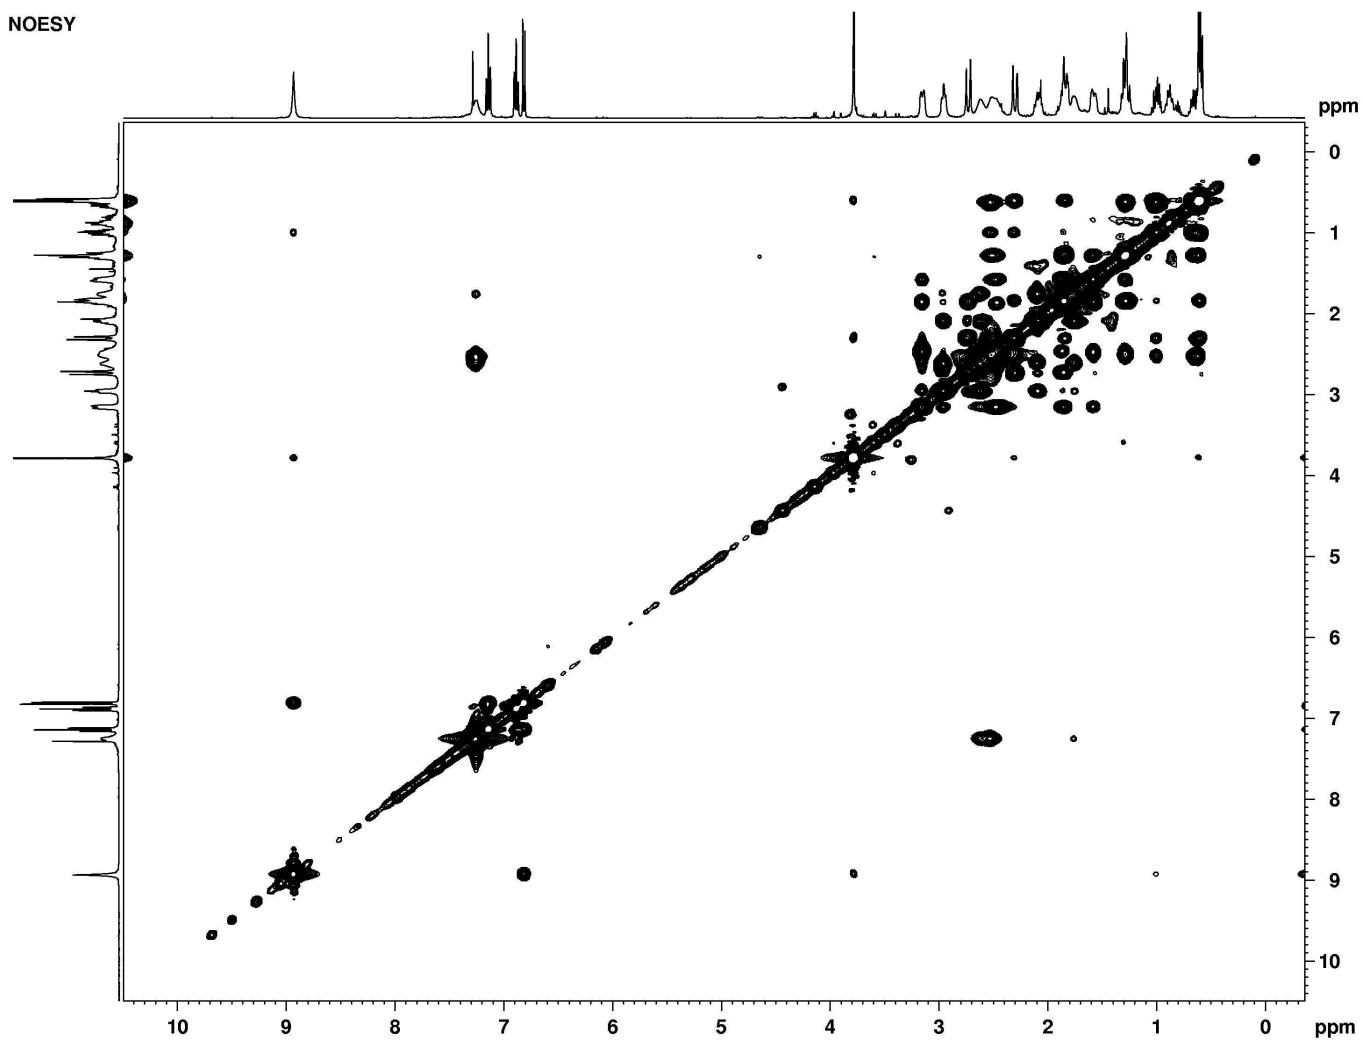

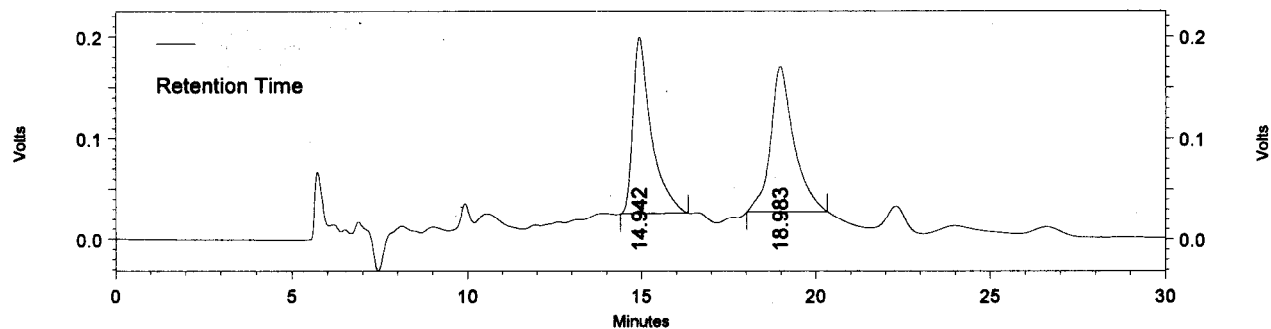

Detector A - 1 (220nm)

| Peak # | Retention Time | Area     | Area %  |
|--------|----------------|----------|---------|
| 1      | 14.942         | 6337602  | 48.540  |
| 2      | 18.983         | 6718724  | 51.460  |
| Totals |                | 13056326 | 100.000 |

Column : Chiralcel OD-H (250x4.6mm)  
 Mobile Phase : Ethanol:Petether:TFA (15:85:0.1)  
 Wavelength : 220nm  
 Flow Rate : 0.5ml/min (26kgf)  
 Sample Con : 1mg/0.5ml Inj vol-5ul

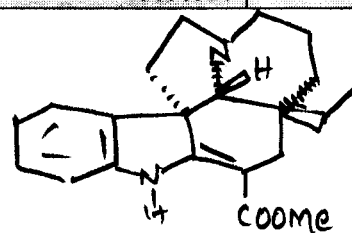

(±)- Vincadifformine

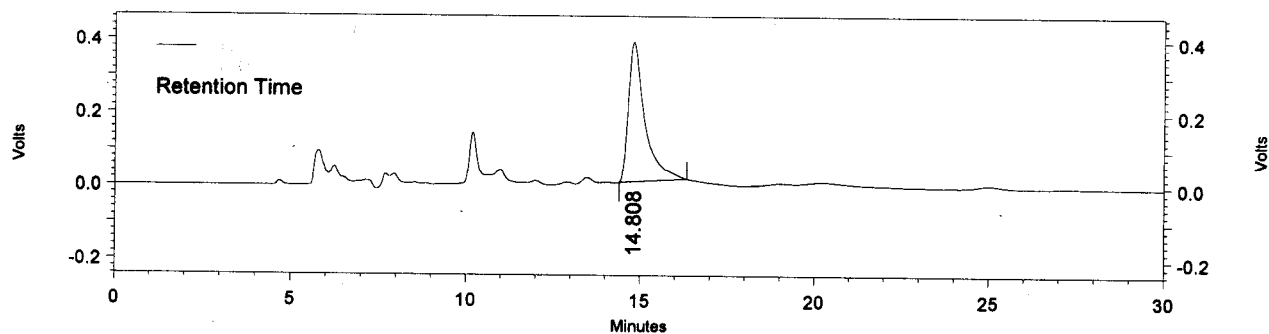

Detector A - 1 (220nm)

| Peak # | Retention Time | Area     | Area %  |
|--------|----------------|----------|---------|
| 1      | 14.808         | 12586161 | 100.000 |
| Totals |                | 12586161 | 100.000 |

Column : Chiralcel OD-H (250x4.6mm)  
 Mobile Phase : Ethanol:Petether:TFA (15:85:0.1)  
 Wavelength : 220nm  
 Flow Rate : 0.5ml/min (26kgf)  
 Sample Con : 1mg/0.5ml Inj vol-5ul

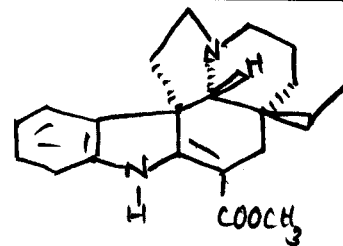

(+)-Vincadifformine.
